# Supplementary material for: Patients with Cholangiocarcinoma Present Specific RNA Profiles in Serum and Urine Extracellular Vesicles Mirroring the Tumor Expression: Novel Liquid Biopsy Biomarkers for Disease Diagnosis
Source: MDPI journal article supplement (doi:10.3390/cells9030721), 2020-03-14
Supplement: s1 [file s1]

Article

# Patients with cholangiocarcinoma present specific RNA profiles in serum and urine extracellular vesicles mirroring the tumor expression: novel liquid biopsy biomarkers for disease diagnosis

Ainhoa Lapitz<sup>1</sup>, Ander Arbelaiz<sup>1</sup>, Colm J. O'Rourke<sup>2</sup>, Jose L. Lavin<sup>3</sup>, Adelaida La Casta<sup>1</sup>, Cesar Ibarra<sup>4</sup>, Juan P. Jimeno<sup>5</sup>, Alvaro Santos-Laso<sup>1</sup>, Laura Izquierdo-Sanchez<sup>1,6</sup>, Marcin Krawczyk<sup>7,8</sup>, Maria J. Perugorria<sup>1,6</sup>, Raul Jimenez-Aguero<sup>1</sup>, Alberto Sanchez-Campos<sup>4</sup>, Ioana Riaño<sup>1</sup>, Esperanza Gonzalez<sup>9</sup>, Frank Lammert<sup>7</sup>, Marco Marzioni<sup>10</sup>, Rocio I.R. Macias<sup>11</sup>, Jose J.G. Marin<sup>11</sup>, Tom H. Karlsen<sup>12</sup>, Luis Bujanda<sup>1,6</sup>, Juan M. Falcon-Perez<sup>6,9,13</sup>, Jesper B. Andersen<sup>2</sup>, Ana M. Aransay<sup>3,6</sup>, Pedro M. Rodrigues<sup>1\*</sup> and Jesus M. Banales<sup>1,6,13\*</sup>

<sup>1</sup>Department of Liver and Gastrointestinal Diseases, Biodonostia Health Research Institute, Donostia University Hospital, University of the Basque Country (UPV/EHU), San Sebastian, Spain.

<sup>2</sup>Biotech Research & Innovation Centre (BRIC), Department of Health and Medical Sciences, Copenhagen, Denmark.

<sup>3</sup>CIC bioGUNE, Genome Analysis Platform, Derio, Spain.

<sup>4</sup>Hospital of Cruces, Bilbao, Spain.

<sup>5</sup>"Complejo Hospitalario de Navarra", Pamplona, Spain.

<sup>6</sup>Carlos III National Institute of Health, Center for the Study of Liver and Gastrointestinal Diseases (CIBERehd), Madrid, Spain.

<sup>7</sup>Department of Medicine II, Saarland University Medical Centre, Saarland University, Homburg, Germany.

<sup>8</sup>Laboratory of Metabolic Liver Diseases, Centre for Preclinical Research, Department of General, Transplant and Liver Surgery, Warsaw, Poland.

<sup>9</sup>Center for Cooperative Research in Biosciences (CIC bioGUNE), Basque Research and Technology Alliance (BRTA), Exosomes Laboratory, Derio, Spain.

<sup>10</sup>"Università Politecnica delle Marche", Department of Gastroenterology, Ancona, Italy.

<sup>11</sup>Experimental Hepatology and Drug Targeting (HEVEFARM), Biomedical Research Institute of Salamanca (IBSAL), Salamanca, Spain.

<sup>12</sup>Norwegian PSC Research Center, Division of Cancer Medicine, Surgery and Transplantation, Oslo, Spain.

<sup>13</sup>IKERBASQUE, Basque Foundation for Science, Bilbao, Spain.

\* Correspondence: [jesus.banales@biodonostia.org](mailto:jesus.banales@biodonostia.org) ; Tel.: +34 943006067 (J.M.B.)  
[pedro.rodrigues@biodonostia.org](mailto:pedro.rodrigues@biodonostia.org) ; Tel.: +34 943006125 (P.M.R.)

Supplementary information

A

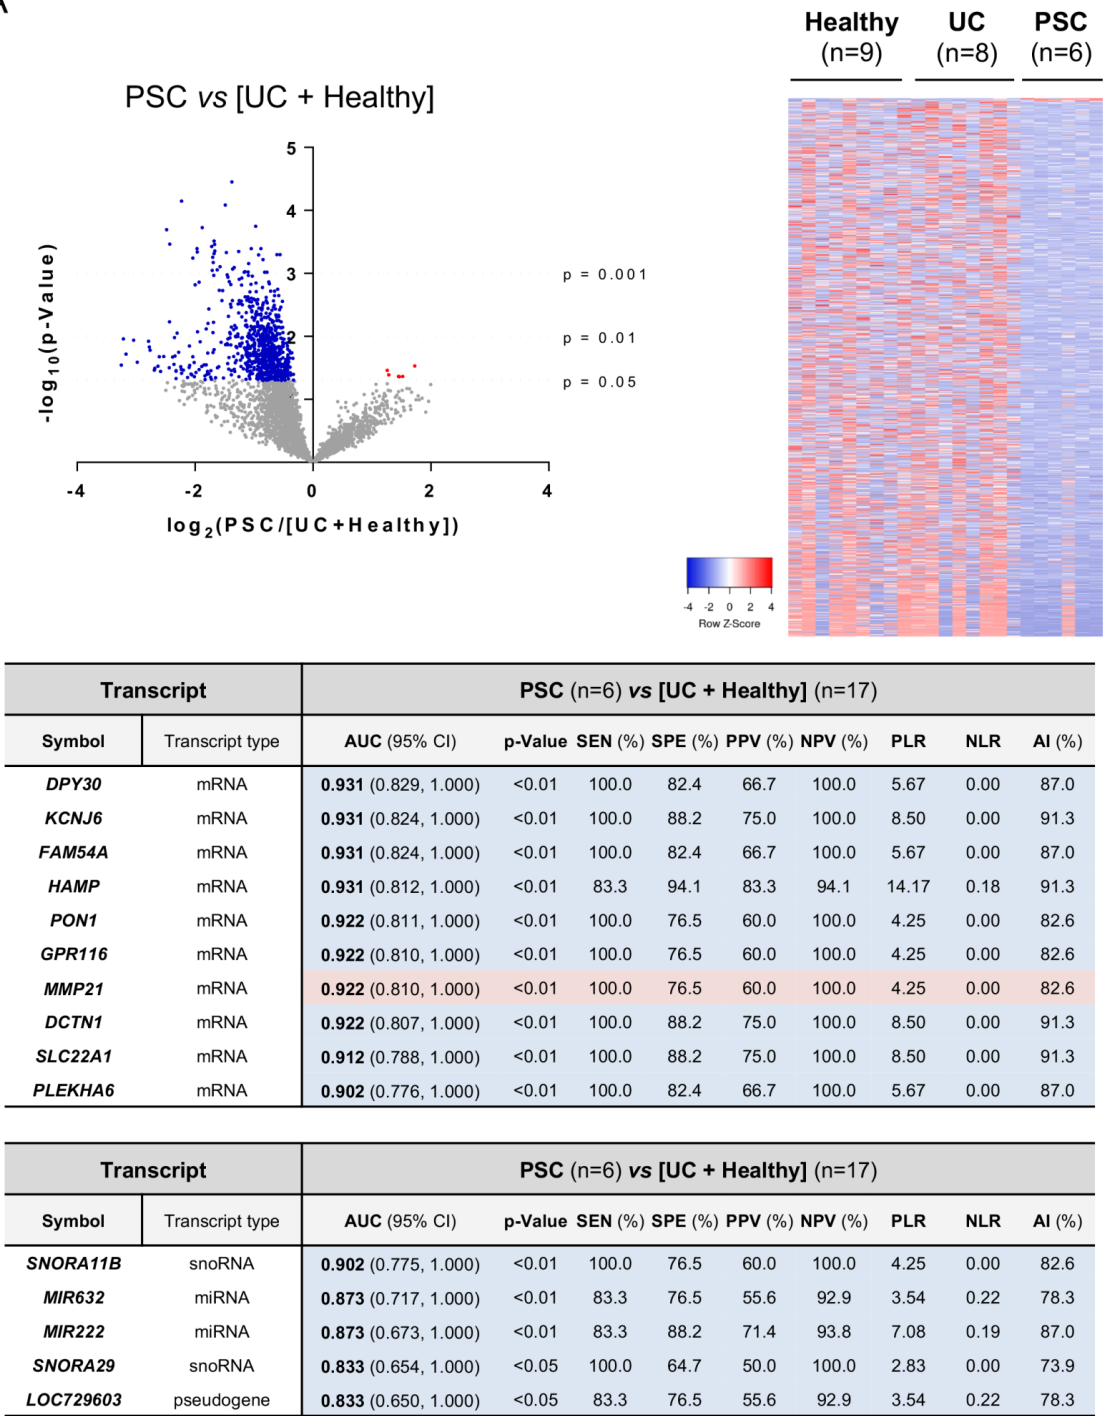

Supplementary Figure 1 – Differential transcriptomic profile and diagnostic efficacy of serum EV transcripts. A) Volcano plot [ $-\log_{10}(\text{p-value})$  and  $\log_2(\text{fold-change})$ ; up left], heatmap of the differentially expressed transcripts (up right) and diagrams with the diagnostic capacity with the highest AUC values of the 10 selected mRNAs and 5 selected non-coding RNAs in serum EVs from PSC vs [UC + Healthy individuals]. Abbreviations: AI, accuracy index; AUC, area under the receiver operating characteristic curve; CI, confidence interval; lncRNA, long non-coding RNA; miRNA, microRNA; NLR, negative likelihood ratio; NPV, negative predictive value; PLR, positive likelihood ratio; PPV, positive predictive value; SEN, sensitivity; snoRNA, small nucleolar RNA; SPE, specificity;

62

B

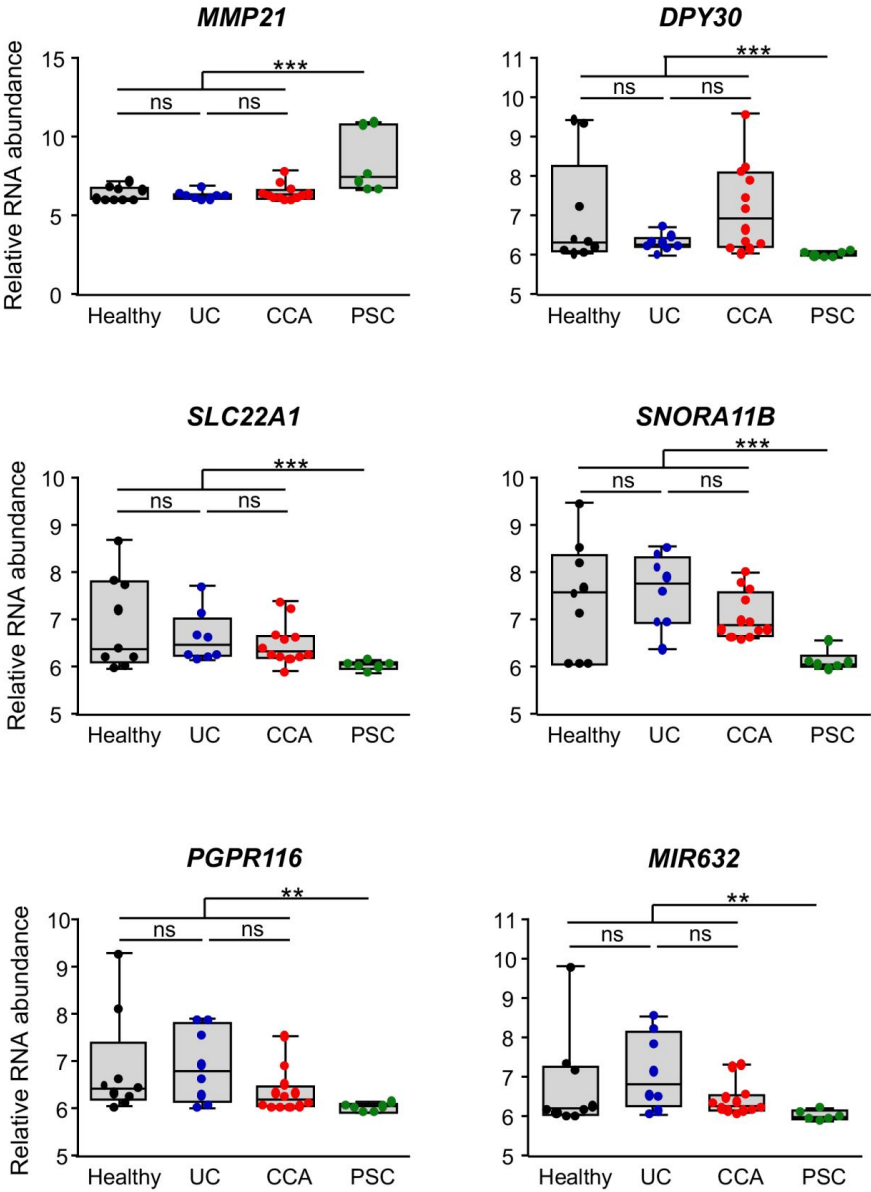

63

64

65

66

Supplementary Figure 1 (continued) – Differential transcriptomic profile and diagnostic efficacy of serum EV transcripts. B) Potential serum EV biomarkers for PSC.

A

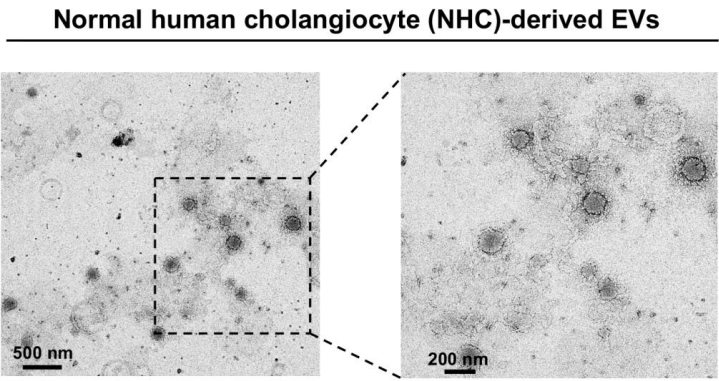

B

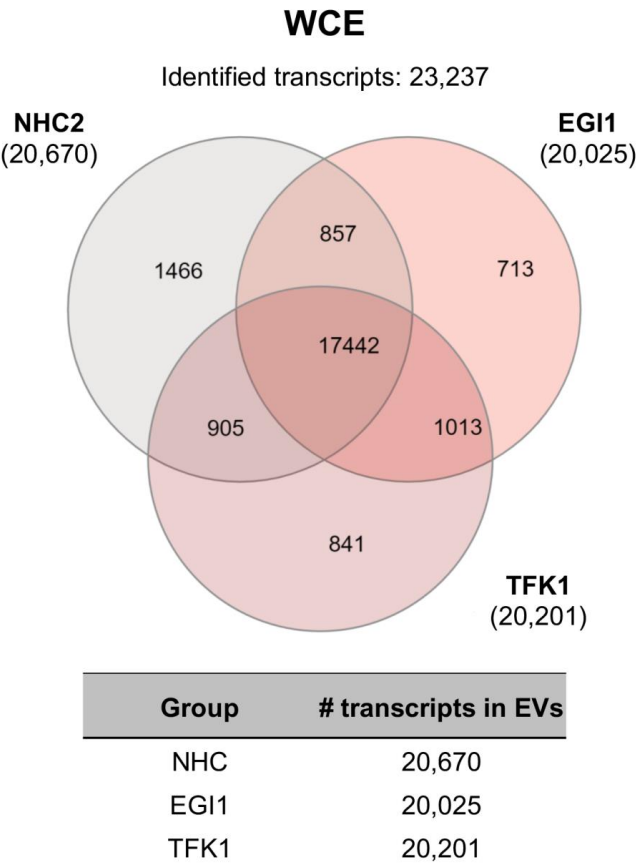

**Supplementary Figure 2 – Characterization of cholangiocyte-derived EVs transcriptome.** In order to validate the protocol for EVs isolation from cholangiocytes, we used normal human cholangiocytes (NHCs). **A)** TEM images of NHC-derived EVs showcasing the typical round shape (~150 nm) and morphology. **B)** Venn diagrams showing the number of transcripts altered for each comparison and the total transcripts identified in each group.

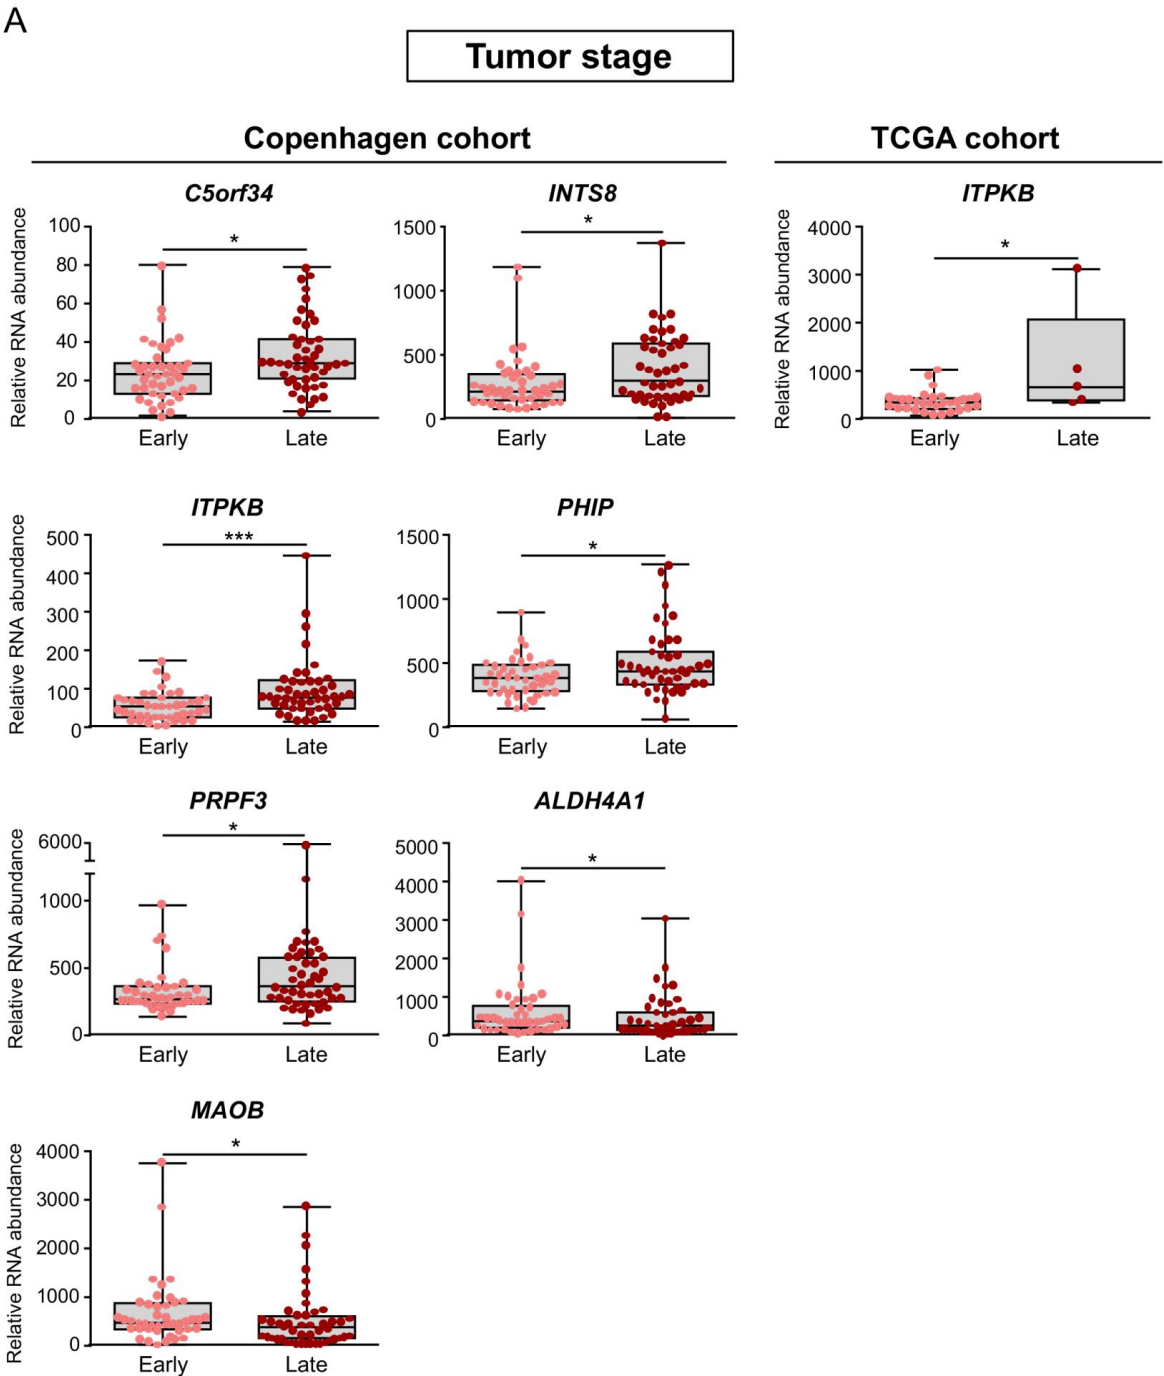

**Supplementary Figure 3 – Comparative analysis of the levels of candidate serum liquid biopsy transcripts with CCA disease severity in the Copenhagen and TCGA cohorts. A) Tumour stage.**  
Abbreviations: Early, T1/2 tumor stage; Late, T3/4 tumor stage.

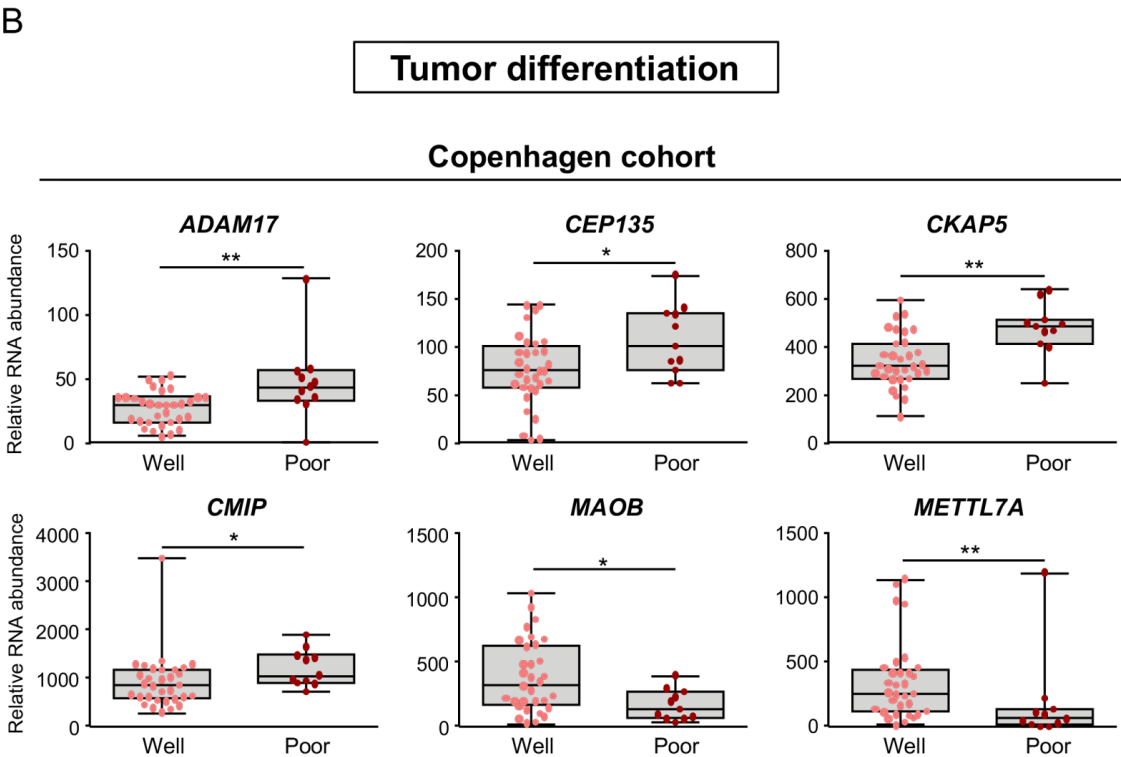

**Supplementary Figure 3 (continued) – Comparative analysis of the levels of candidate serum liquid biopsy transcripts with CCA disease severity in the Copenhagen and TCGA cohorts. B) Tumour differentiation.** Abbreviations: Well, well + well to moderate + moderate tumor differentiation; Poor, moderate to poor + poor differentiation.

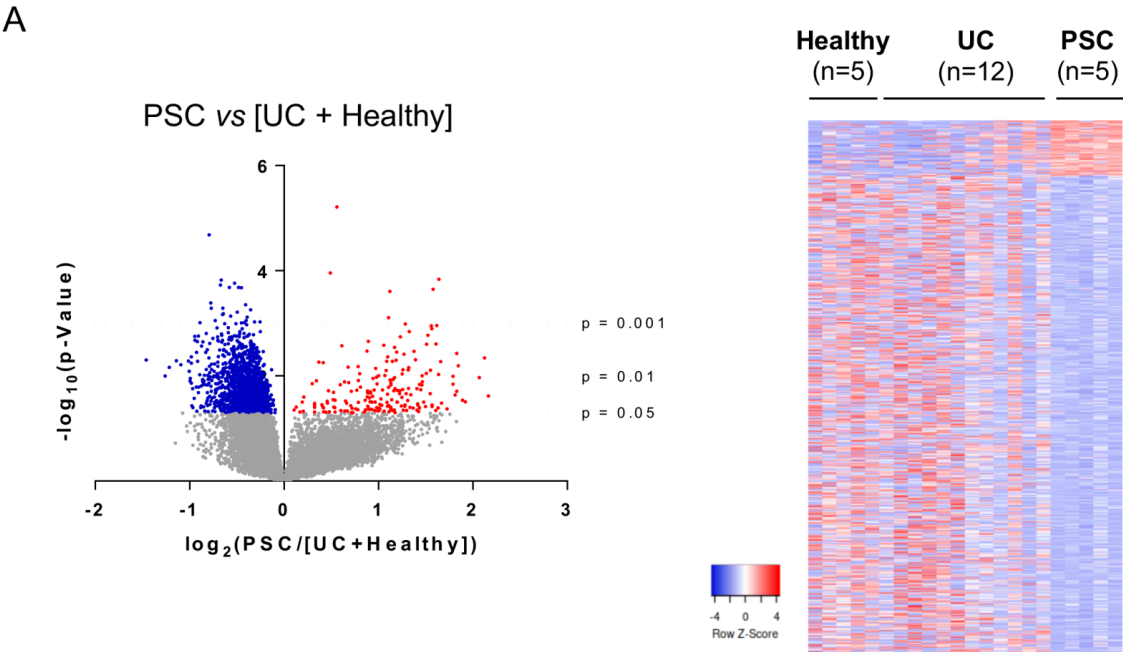

| Transcript |                 | PSC (n=5) vs [UC + Healthy] (n=17) |         |         |         |         |         |       |      |        |
|------------|-----------------|------------------------------------|---------|---------|---------|---------|---------|-------|------|--------|
| Symbol     | Transcript type | AUC (95% CI)                       | p-Value | SEN (%) | SPE (%) | PPV (%) | NPV (%) | PLR   | NLR  | AI (%) |
| ZSCAN2     | mRNA            | 1.000 (1.000, 1.000)               | <0.001  | 100.0   | 100.0   | 100.0   | 100.0   | >100  | 0.00 | 100.0  |
| LRRC8D     | mRNA            | 1.000 (1.000, 1.000)               | <0.001  | 100.0   | 100.0   | 100.0   | 100.0   | >100  | 0.00 | 100.0  |
| DDX54      | mRNA            | 1.000 (1.000, 1.000)               | <0.001  | 100.0   | 100.0   | 100.0   | 100.0   | >100  | 0.00 | 100.0  |
| DLGAP3     | mRNA            | 0.988 (0.952, 1.000)               | <0.001  | 100.0   | 94.1    | 83.3    | 100.0   | 17.00 | 0.00 | 95.5   |
| ELOVL6     | mRNA            | 0.988 (0.952, 1.000)               | <0.001  | 100.0   | 94.1    | 83.3    | 100.0   | 17.00 | 0.00 | 95.5   |
| KIAA0195   | mRNA            | 0.988 (0.952, 1.000)               | <0.001  | 100.0   | 94.1    | 83.3    | 100.0   | 17.00 | 0.00 | 95.5   |
| SEMA3F     | mRNA            | 0.976 (0.920, 1.000)               | <0.001  | 100.0   | 94.1    | 83.3    | 100.0   | 17.00 | 0.00 | 95.5   |
| BCL2L1     | mRNA            | 0.976 (0.918, 1.000)               | <0.001  | 100.0   | 88.2    | 71.4    | 100.0   | 8.50  | 0.00 | 90.9   |
| PDZRN4     | mRNA            | 0.965 (0.889, 1.000)               | <0.01   | 100.0   | 94.1    | 83.3    | 100.0   | 17.00 | 0.00 | 95.5   |
| FOXP1      | mRNA            | 0.965 (0.889, 1.000)               | <0.01   | 100.0   | 94.1    | 83.3    | 100.0   | 17.00 | 0.00 | 95.5   |

| Transcript |                 | PSC (n=5) vs [UC + Healthy] (n=17) |         |         |         |         |         |       |      |        |
|------------|-----------------|------------------------------------|---------|---------|---------|---------|---------|-------|------|--------|
| Symbol     | Transcript type | AUC (95% CI)                       | p-Value | SEN (%) | SPE (%) | PPV (%) | NPV (%) | PLR   | NLR  | AI (%) |
| SNORD85    | snoRNA          | 0.965 (0.886, 1.000)               | <0.01   | 100.0   | 82.4    | 62.5    | 100.0   | 5.67  | 0.00 | 86.4   |
| LOC286135  | lincRNA         | 0.941 (0.843, 1.000)               | <0.01   | 100.0   | 82.4    | 62.5    | 100.0   | 5.67  | 0.00 | 86.4   |
| MIR34B     | miRNA           | 0.906 (0.780, 1.000)               | <0.01   | 100.0   | 82.4    | 62.5    | 100.0   | 5.67  | 0.00 | 86.4   |
| LOH12CR2   | lincRNA         | 0.906 (0.779, 1.000)               | <0.01   | 100.0   | 82.4    | 62.5    | 100.0   | 5.67  | 0.00 | 86.4   |
| MIR183     | miRNA           | 0.906 (0.762, 1.000)               | <0.01   | 80.0    | 94.1    | 80.0    | 94.1    | 13.60 | 0.21 | 90.9   |

Supplementary Figure 4 – Differential transcriptomic profile and diagnostic efficacy of urine EV transcripts. A) Volcano plot [ $-\log_{10}(\text{p-value})$  and  $\log_2(\text{fold-change})$ ; up left], heatmap of the differentially expressed transcripts (up right) and diagrams with the diagnostic capacity with the highest AUC values of the 10 selected mRNAs and 5 selected non-coding RNAs in serum EVs from PSC vs [UC + Healthy individuals]. Abbreviations: AI, accuracy index; AUC, area under the receiver operating characteristic curve; CI, confidence interval; lincRNA, long non-coding RNA; miRNA, microRNA; NLR, negative likelihood ratio; NPV, negative predictive value; PLR, positive likelihood ratio; PPV, positive predictive value; SEN, sensitivity; snoRNA, small nucleolar RNA; SPE, specificity;



B

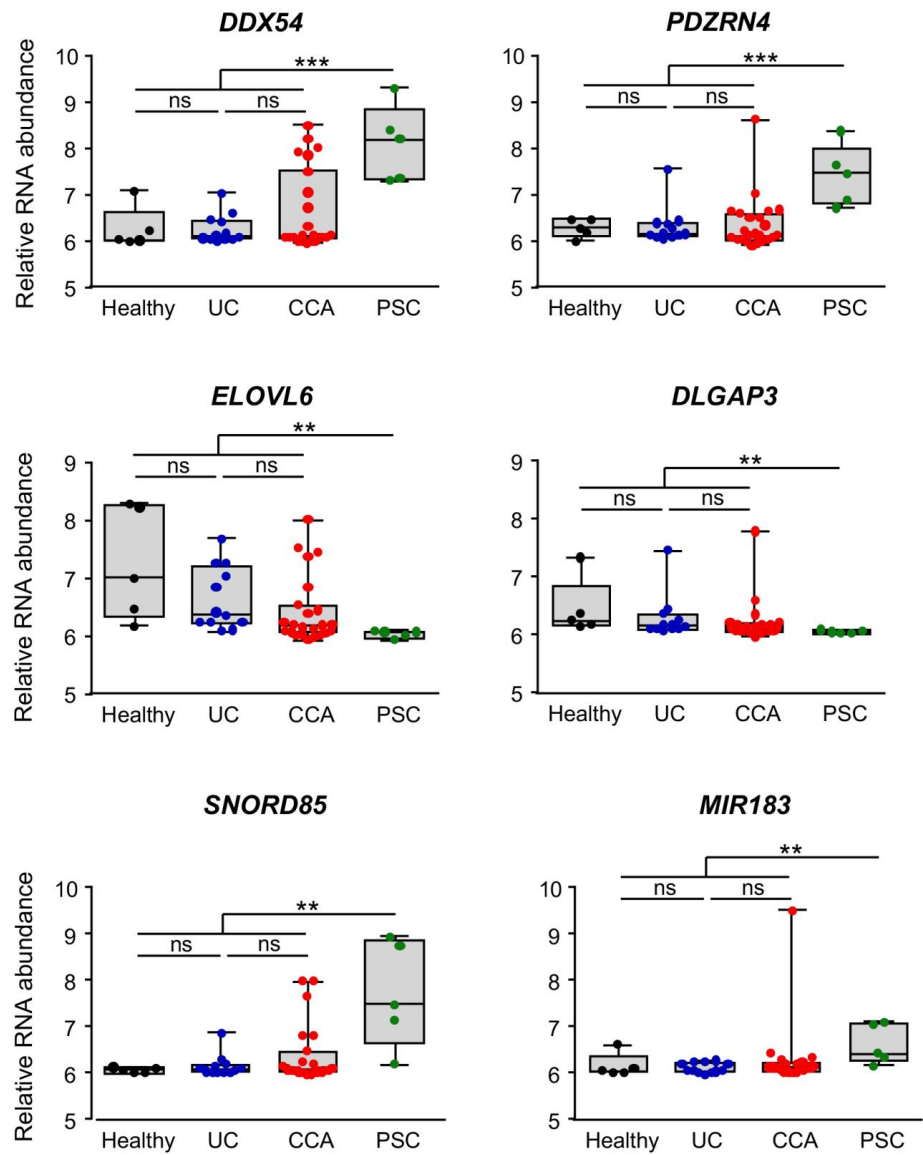

Supplementary Figure 4 (continued) – Differential transcriptomic profile and diagnostic efficacy of urine EV transcripts. B) Potential serum EV biomarkers for PSC.



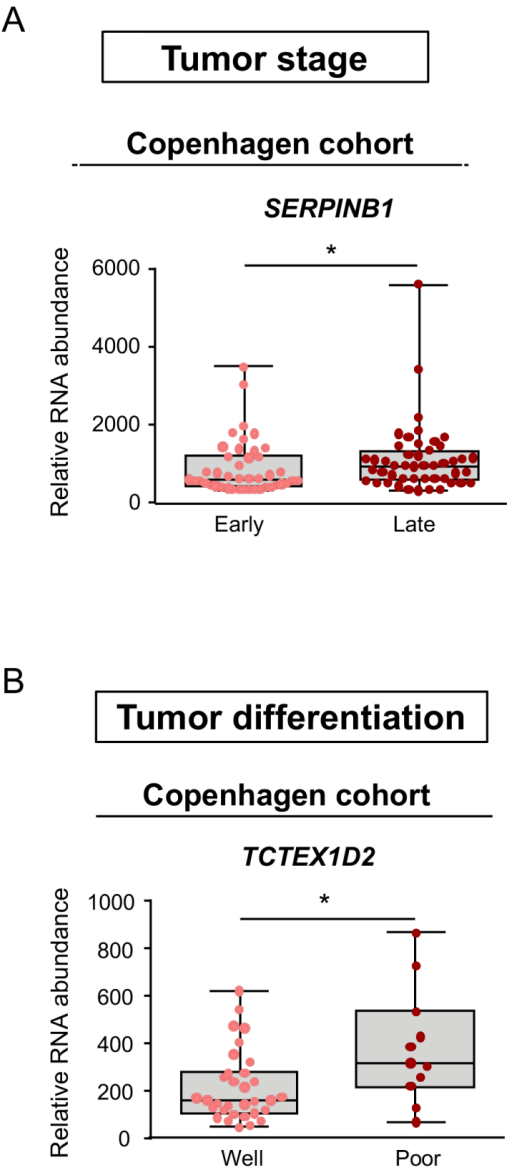

**Supplementary Figure 5 – Comparative analysis of the levels of candidate urine liquid biopsy transcripts with CCA disease severity in the Copenhagen and TCGA cohorts. A) Tumour stage; B) Tumour differentiation.** Abbreviations: Early, T1/2 tumor stage; Late, T3/4 tumor stage; Well, well + well to moderate + moderate tumor differentiation; Poor, moderate to poor + poor differentiation.

117      **Supplementary Table 1: Clinical information from study individuals**

|                                       |             | Serum               |                   |                    |                         | Urine               |                   |                    |                         |
|---------------------------------------|-------------|---------------------|-------------------|--------------------|-------------------------|---------------------|-------------------|--------------------|-------------------------|
|                                       |             | Healthy             | UC                | PSC                | CCA                     | Healthy             | UC                | PSC                | CCA                     |
| Patients (n)                          |             | 9                   | 8                 | 6                  | 12                      | 5                   | 12                | 5                  | 23                      |
| Age, mean [range] (years)             |             | 41.4<br>[26-72]     | 54.3<br>[33-82]   | 45.5<br>[16-75]    | 67.4<br>[59-79]         | 66.2<br>[53-72]     | 58.8<br>[42-82]   | 49.6<br>[26-75]    | 67.8<br>[50-82]         |
| Gender, M / F (n/n)                   |             | 4 / 5               | 5 / 3             | 6                  | 9 / 3                   | 3 / 2               | 6 / 6             | 4 / 1              | 16 / 7                  |
| ALT, mean [range] (IU/L)              |             | NA                  | 16.50<br>[9-29]   | 44.33<br>[12-128]  | 56.67<br>[11-200]       | NA                  | 15.83<br>[9-30]   | 36.60<br>[18-62]   | 115.96<br>[11-672]      |
| AST, mean [range] (IU/L)              |             | NA                  | 16.25<br>[10-20]  | 36.83<br>[16-83]   | 46.09<br>[19-104]       | NA                  | 17.67<br>[10-28]  | 35.80<br>[20-56]   | 85.00<br>[19-379]       |
| GGT, mean [range] (IU/L)              |             | NA                  | 24.88<br>[13-38]  | 122.33<br>[17-361] | 750.33<br>[87-3011]     | NA                  | 22.25<br>[14-38]  | 119.40<br>[35-241] | 781.87<br>[87-3011]     |
| Bilirubin, mean [range]<br>(mg/dL)    |             | 0.85<br>[0.4-1.3]   | 0.68<br>[0.3-1.1] | 1.10<br>[0.5-2.4]  | 2.65<br>[0.3-16.7]      | 0.68<br>[0.4-1.3]   | 0.63<br>[0.3-1.1] | 1.00<br>[0.3-2.4]  | 6.00<br>[0.3-31.3]      |
| ALP, mean [range]<br>(mg/dL)          |             | 57.50<br>[52-63]    | 60.38<br>[42-95]  | 237.50<br>[54-634] | 320.33<br>[68-699]      | 70.00<br>[52-95]    | 67.67<br>[42-95]  | 301.8<br>[54-634]  | 406.91<br>[68-1956]     |
| CA19-9, mean [range]<br>(U/mL)        |             | 12.95<br>[5.6-38.5] | NA                | 16.33<br>[5-35]    | 5346.10<br>[51.5-22039] | 13.18<br>[4.9-38.5] | NA                | 13.33<br>[0-35]    | 5967.60<br>[51.5-23244] |
| CCA<br>type                           | iCCA        | -                   | -                 | -                  | 4                       | -                   | -                 | -                  | 5                       |
|                                       | pCCA        | -                   | -                 | -                  | 6                       | -                   | -                 | -                  | 9                       |
|                                       | dCCA        | -                   | -                 | -                  | 2                       | -                   | -                 | -                  | 9                       |
| Tumor<br>stage                        | I           | -                   | -                 | -                  | 1                       | -                   | -                 | -                  | 1                       |
|                                       | II          | -                   | -                 | -                  | 3                       | -                   | -                 | -                  | 7                       |
|                                       | III         | -                   | -                 | -                  | 4                       | -                   | -                 | -                  | 4                       |
|                                       | IV          | -                   | -                 | -                  | 3                       | -                   | -                 | -                  | 8                       |
|                                       | Unknown     | -                   | -                 | -                  | 1                       | -                   | -                 | -                  | 3                       |
| Tumor<br>different<br>iation<br>grade | Well        | -                   | -                 | -                  | 2                       | -                   | -                 | -                  | 6                       |
|                                       | Moderate    | -                   | -                 | -                  | 1                       | -                   | -                 | -                  | 4                       |
|                                       | Poor        | -                   | -                 | -                  | 0                       | -                   | -                 | -                  | 0                       |
|                                       | Unknown     | -                   | -                 | -                  | 9                       | -                   | -                 | -                  | 13                      |
| IBD                                   | No IBD      | 0                   | 0                 | 1                  | 12                      | 0                   | 0                 | 1                  | 23                      |
|                                       | UC          | 0                   | 8                 | 3                  | 0                       | 0                   | 12                | 2                  | 0                       |
|                                       | Crohn       | 0                   | 0                 | 1                  | 0                       | 0                   | 0                 | 2                  | 0                       |
|                                       | Unspecified | 0                   | 0                 | 1                  | 0                       | 0                   | 0                 | 0                  | 0                       |

118  
119  
120  
121  
122  
123  
124  
125  
126  
127  
128

Supplementary Table 2: Number of transcripts identified in each experimental group

|                       | Array transcripts | Serum         |        |       |        | Urine         |        |        |        |
|-----------------------|-------------------|---------------|--------|-------|--------|---------------|--------|--------|--------|
|                       |                   | Healthy       | UC     | PSC   | CCA    | Healthy       | UC     | PSC    | CCA    |
| mRNA                  | 27,580            | 9,516         | 10,526 | 3,949 | 23,029 | 10,949        | 22,801 | 21,145 | 24,817 |
| non-coding RNA        | 726               | 310           | 326    | 131   | 635    | 202           | 581    | 542    | 637    |
| microRNA              | 518               | 105           | 123    | 49    | 309    | 57            | 273    | 224    | 319    |
| small nucleolar RNA   | 263               | 119           | 95     | 43    | 199    | 70            | 175    | 162    | 201    |
| misc RNA              | 48                | 16            | 16     | 6     | 43     | 14            | 39     | 39     | 42     |
| guide RNA             | 23                | 11            | 13     | 5     | 19     | 5             | 20     | 16     | 20     |
| small nuclear RNA     | 16                | 15            | 14     | 12    | 15     | 14            | 15     | 15     | 15     |
| antisense RNA         | 10                | 4             | 4      | 2     | 7      | 4             | 8      | 8      | 7      |
| small cytoplasmic RNA | 5                 | 5             | 5      | 5     | 5      | 5             | 5      | 5      | 5      |
| RNase MRP RNA         | 1                 | 1             | 1      | 1     | 1      | 1             | 1      | 1      | 1      |
| ribosomal RNA         | 1                 | 1             | 1      | 1     | 1      | 1             | 1      | 1      | 1      |
| telomerase RNA        | 1                 | 1             | 0      | 0     | 1      | 1             | 1      | 1      | 1      |
|                       |                   | Total: 25,804 |        |       |        | Total: 27,319 |        |        |        |
