# Supplementary material for: Patients with Cholangiocarcinoma Present Specific RNA Profiles in Serum and Urine Extracellular Vesicles Mirroring the Tumor Expression: Novel Liquid Biopsy Biomarkers for Disease Diagnosis
Source: MDPI journal article supplement (doi:10.3390/cells9030721), 2020-03-14
Supplement: s1 [file s1]

Archive with 12 entries (12 files):
- Lapitz A_supplementary information_05032020.docx
- Lapitz A_supplementary information_05032020.pdf
- Suppl Fig 1A.tif
- Suppl Fig 1B.tif
- Suppl Fig 2A,B.tif
- Suppl Fig 3A.tif
- Suppl Fig 3B.tif
- Suppl Fig 4A.tif
- Suppl Fig 4B.tif
- Suppl Fig 5A,B.tif
- Suppl Table 1.tif
- Suppl Table 2.tif
