# Supplementary material for: Patients with Cholangiocarcinoma Present Specific RNA Profiles in Serum and Urine Extracellular Vesicles Mirroring the Tumor Expression: Novel Liquid Biopsy Biomarkers for Disease Diagnosis
Source: MDPI journal article supplement (doi:10.3390/cells9030721), 2020-03-14
Supplement: s1 [file s1 › Lapitz A_supplementary information_05032020.docx]

Article

Patients with cholangiocarcinoma present specific RNA profiles in serum and urine extracellular vesicles mirroring the tumor expression: novel liquid biopsy biomarkers for disease diagnosis

**Ainhoa Lapitz1, Ander Arbelaiz1, Colm J. O’Rourke2, Jose L. Lavin3, Adelaida La Casta1, Cesar Ibarra4, Juan P. Jimeno5, Alvaro Santos-Laso1, Laura Izquierdo-Sanchez1,6, Marcin Krawczyk7,8, Maria J. Perugorria1,6, Raul Jimenez-Aguero1, Alberto Sanchez-Campos4, Ioana Riaño1, Esperanza Gonzalez9, Frank Lammert7, Marco Marzioni10, Rocio I.R. Macias11, Jose J.G. Marin11, Tom H. Karlsen12, Luis Bujanda1,6, Juan M. Falcon-Perez6,9,13, Jesper B. Andersen2, Ana M. Aransay3,6, Pedro M. Rodrigues1* and Jesus M. Banales1,6,13***

1Department of Liver and Gastrointestinal Diseases, Biodonostia Health Research Institute, Donostia University Hospital, University of the Basque Country (UPV/EHU), San Sebastian, Spain.

2Biotech Research & Innovation Centre (BRIC), Department of Health and Medical Sciences, Copenhagen, Denmark.

3CIC bioGUNE, Genome Analysis Platform, Derio, Spain.

4Hospital of Cruces, Bilbao, Spain.

5“Complejo Hospitalario de Navarra”, Pamplona, Spain.

6Carlos III National Institute of Health, Center for the Study of Liver and Gastrointestinal Diseases (CIBERehd), Madrid, Spain.

7Department of Medicine II, Saarland University Medical Centre, Saarland University, Homburg, Germany.

8Laboratory of Metabolic Liver Diseases, Centre for Preclinical Research, Department of General, Transplant and Liver Surgery, Warsaw, Poland.

9Center for Cooperative Research in Biosciences (CIC bioGUNE), Basque Research and Technology Alliance (BRTA), Exosomes Laboratory, Derio, Spain.

10“Università Politecnica delle Marche”, Department of Gastroenterology, Ancona, Italy.

11Experimental Hepatology and Drug Targeting (HEVEFARM), Biomedical Research Institute of Salamanca (IBSAL), Salamanca, Spain.

12Norwegian PSC Research Center, Division of Cancer Medicine, Surgery and Transplantation, Oslo, Spain.

13IKERBASQUE, Basque Foundation for Science, Bilbao, Spain.

***** Correspondence: jesus.banales@biodonostia.org ; Tel.: +34 943006067 (J.M.B.)

pedro.rodrigues@biodonostia.org ; Tel.: +34 943006125 (P.M.R.)

**Supplementary information**

**
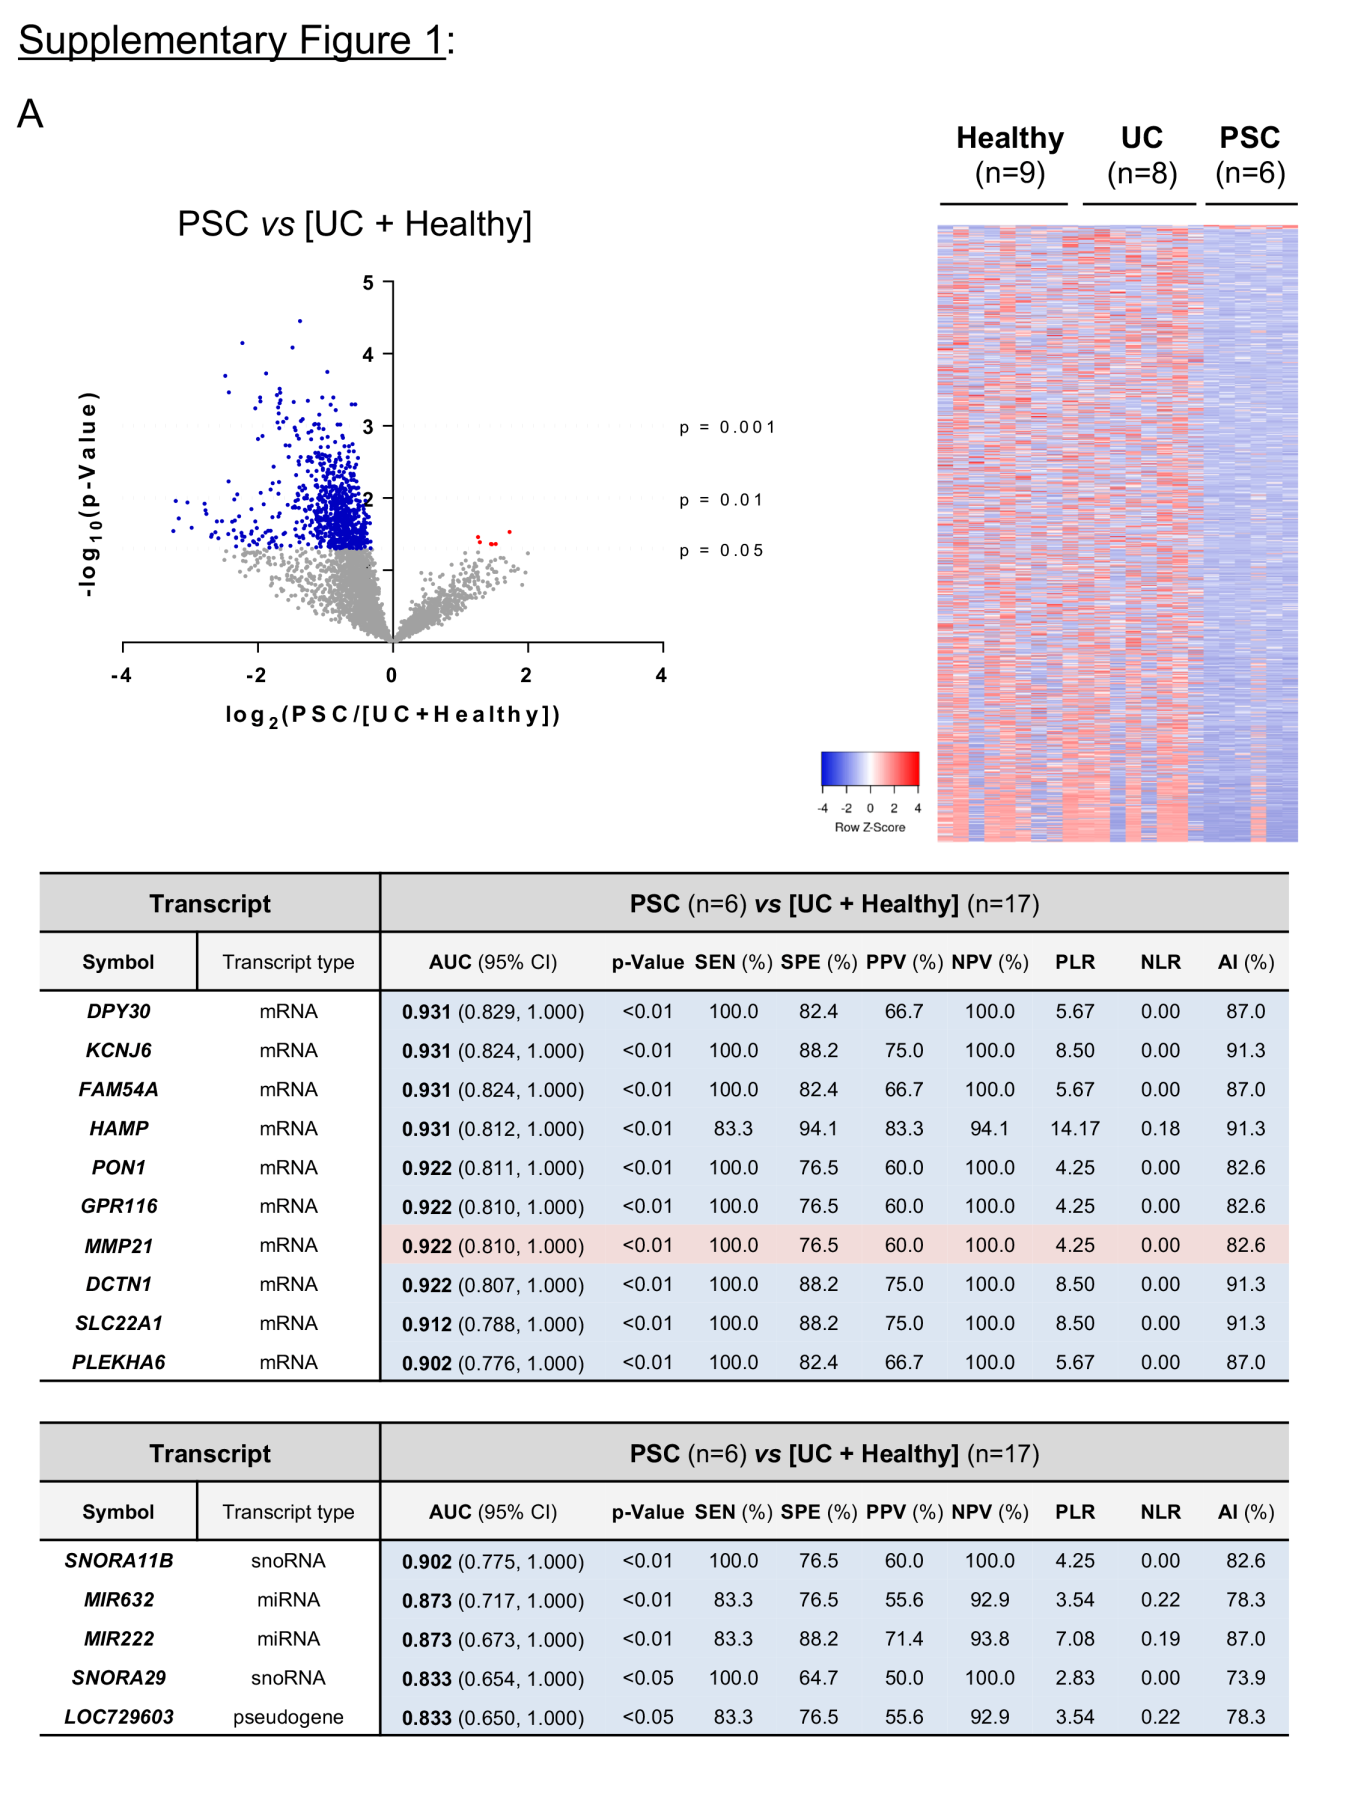
**

**Supplementary Figure 1 – Differential transcriptomic profile and diagnostic efficacy of serum EV transcripts. A)** Volcano plot [-log10(p-value) and log2(fold-change); up left], heatmap of the differentially expressed transcripts (up right) and diagrams with the diagnostic capacity with the highest AUC values of the 10 selected mRNAs and 5 selected non-coding RNAs in serum EVs from PSC *vs* [UC + Healthy individuals]. Abbreviations: AI, accuracy index; AUC, area under the receiver operating characteristic curve; CI, confidence interval; lncRNA, long non-coding RNA; miRNA, microRNA; NLR, negative likelihood ratio; NPV, negative predictive value; PLR, positive likelihood ratio; PPV, positive predictive value; SEN, sensitivity; snoRNA, small nucleolar RNA; SPE, specificity;

**
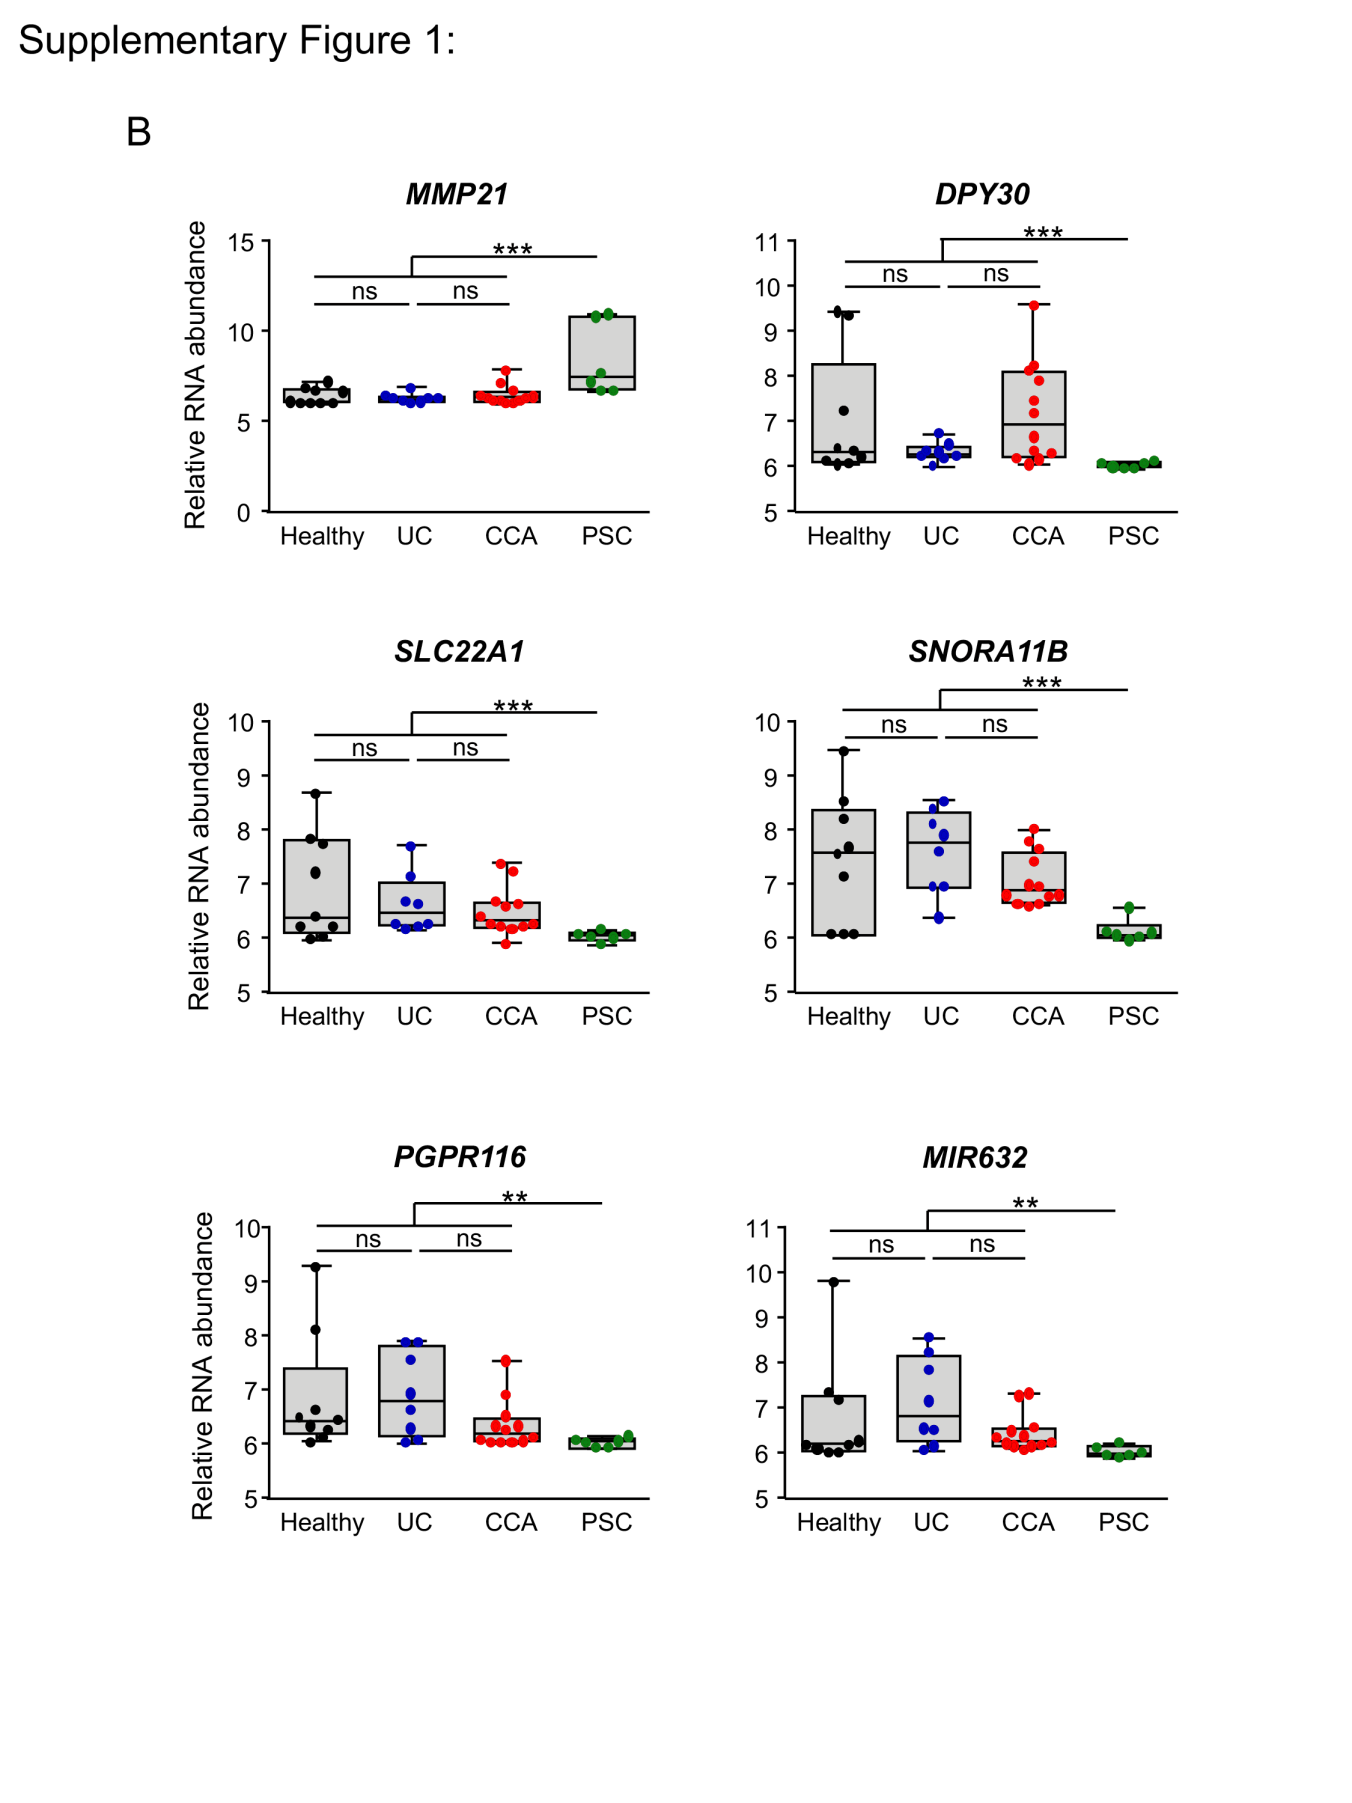
**

**Supplementary Figure 1 (continued) – Differential transcriptomic profile and diagnostic efficacy of serum EV transcripts. B)** Potential serum EV biomarkers for PSC.


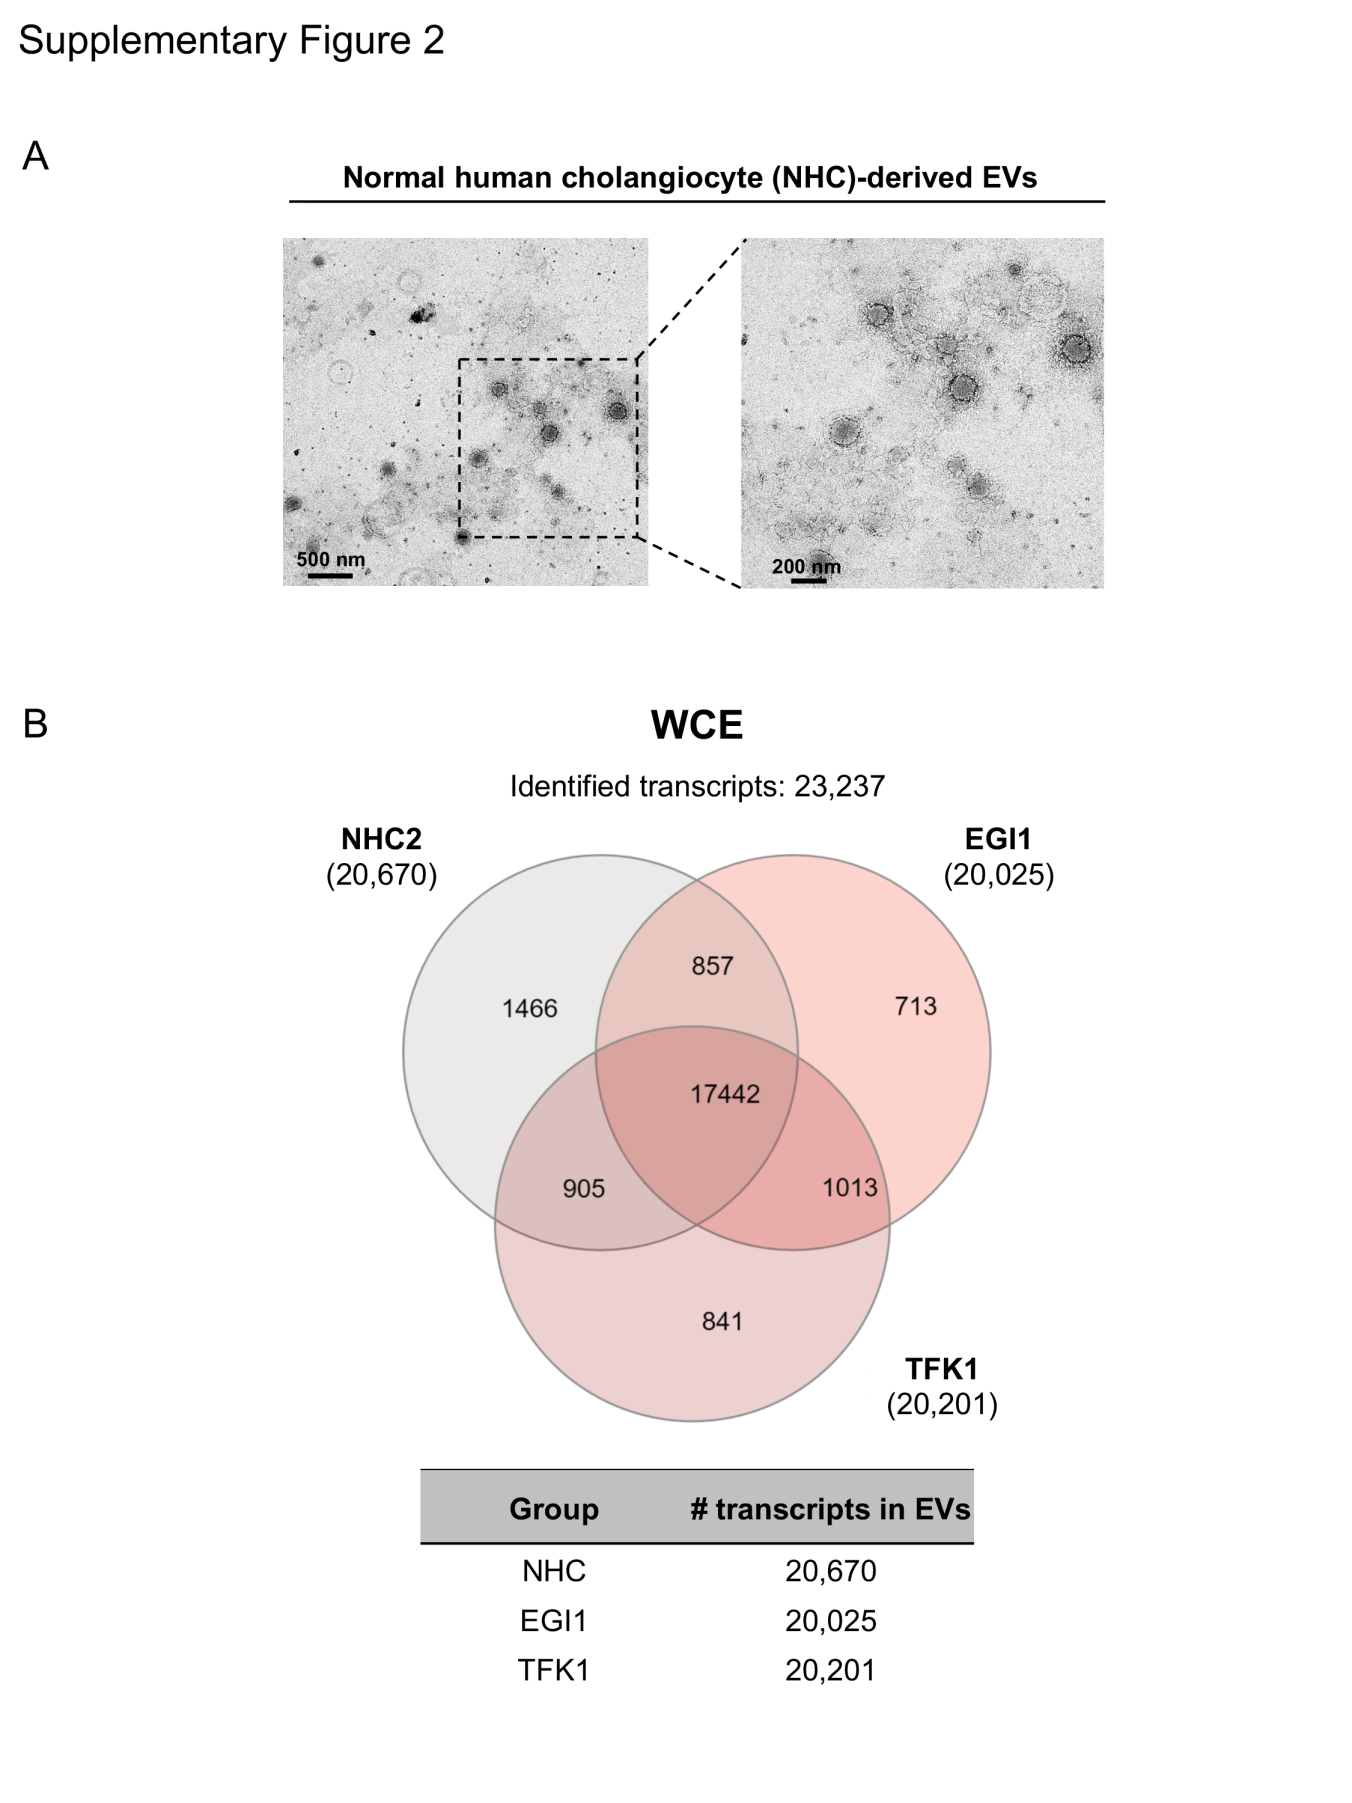


**Supplementary Figure 2** – **Characterization of cholangiocyte-derived EVs transcriptome**. In order to validate the protocol for EVs isolation from cholangiocytes, we used normal human cholangiocytes (NHCs). **A)** TEM images of NHC-derived EVs showcasing the typical round shape (~150 nm) and morphology. **B)** Venn diagrams showing the number of transcripts altered for each comparison and the total transcripts identified in each group.


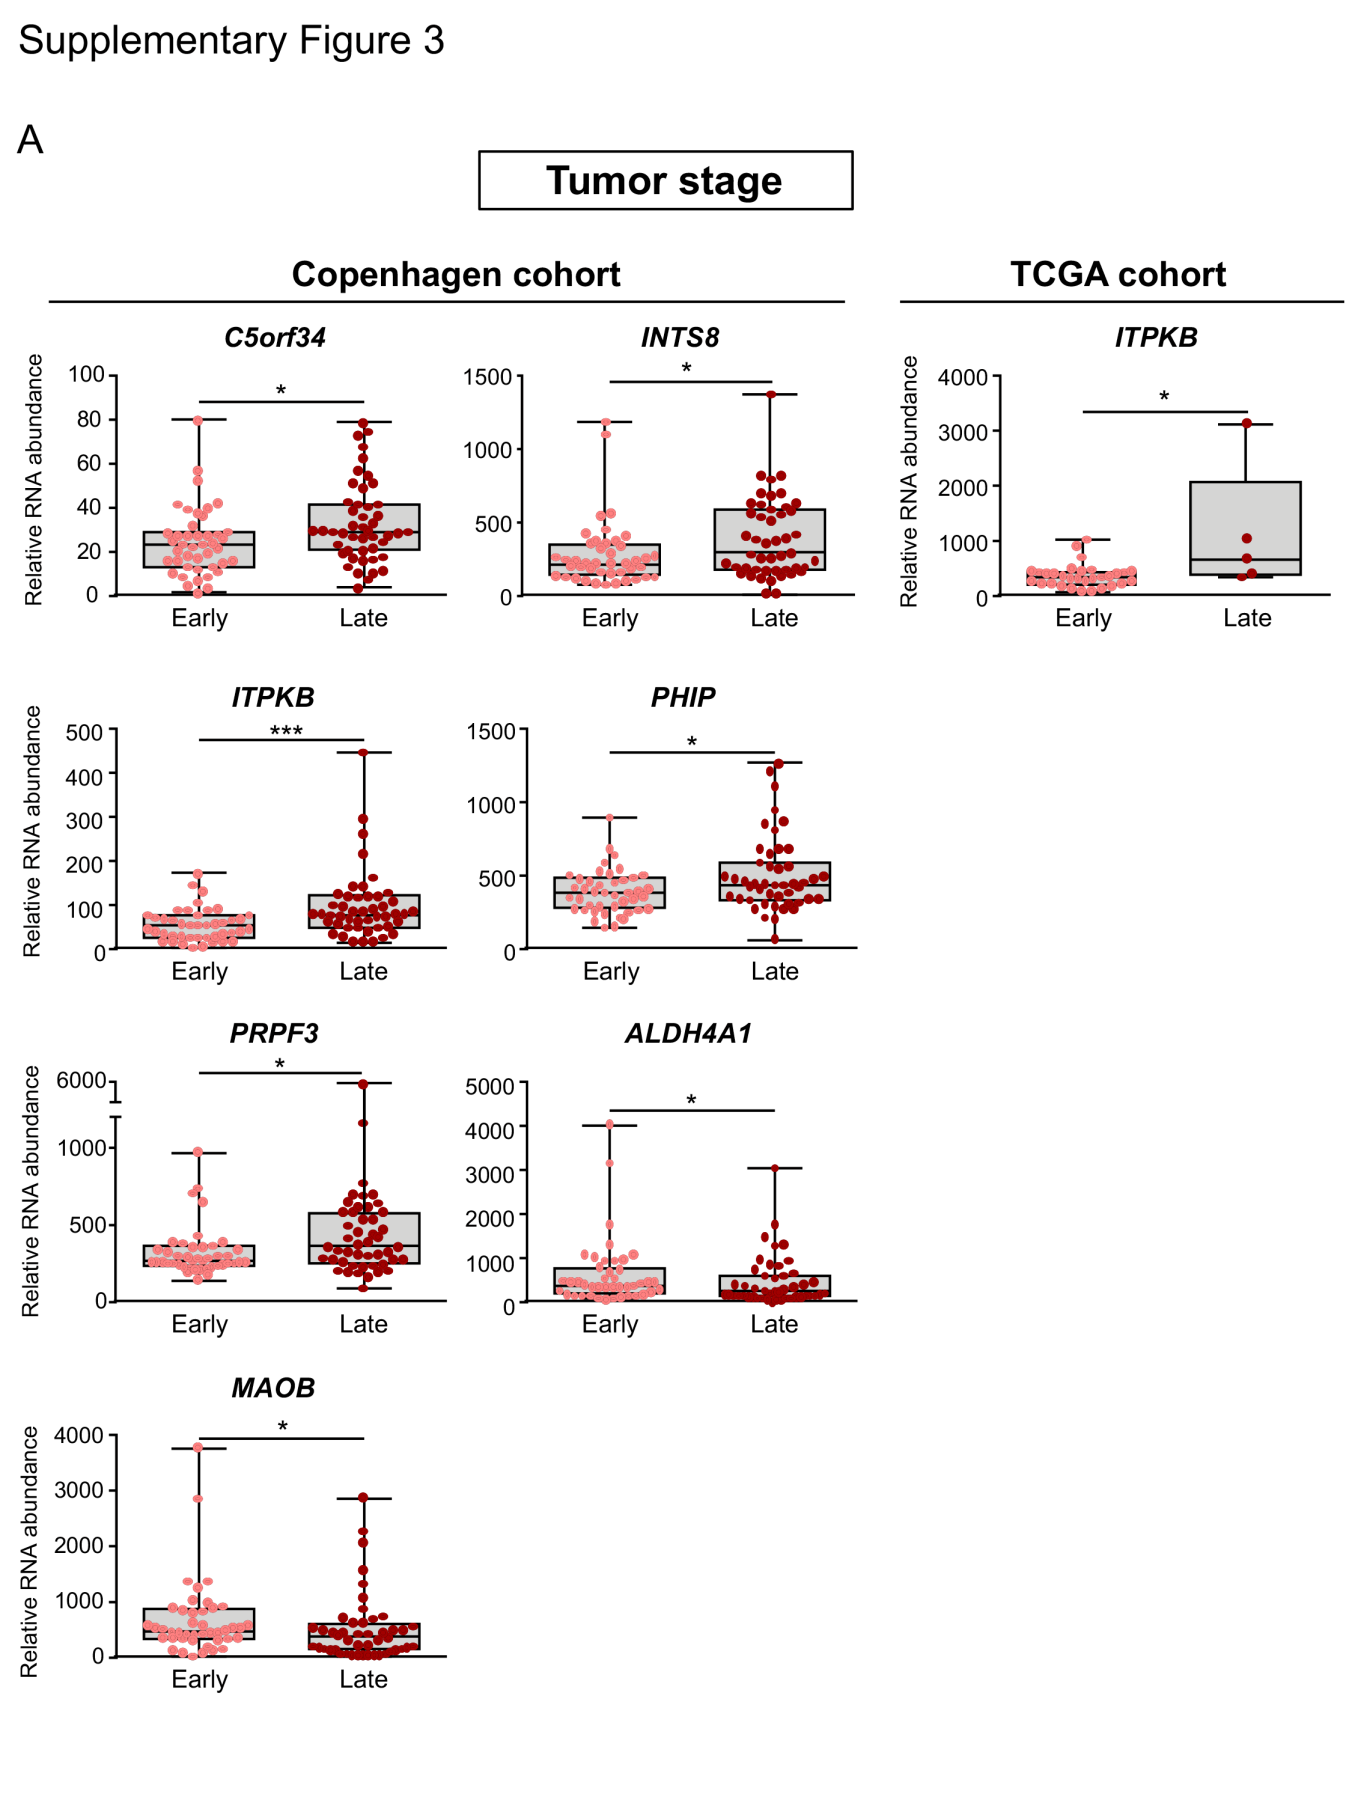


**Supplementary Figure 3 – Comparative analysis of the levels of candidate serum liquid biopsy transcripts with CCA disease severity in the Copenhagen and TCGA cohorts. A)** Tumour stage. Abbreviations: Early, T1/2 tumor stage; Late, T3/4 tumor stage.

**
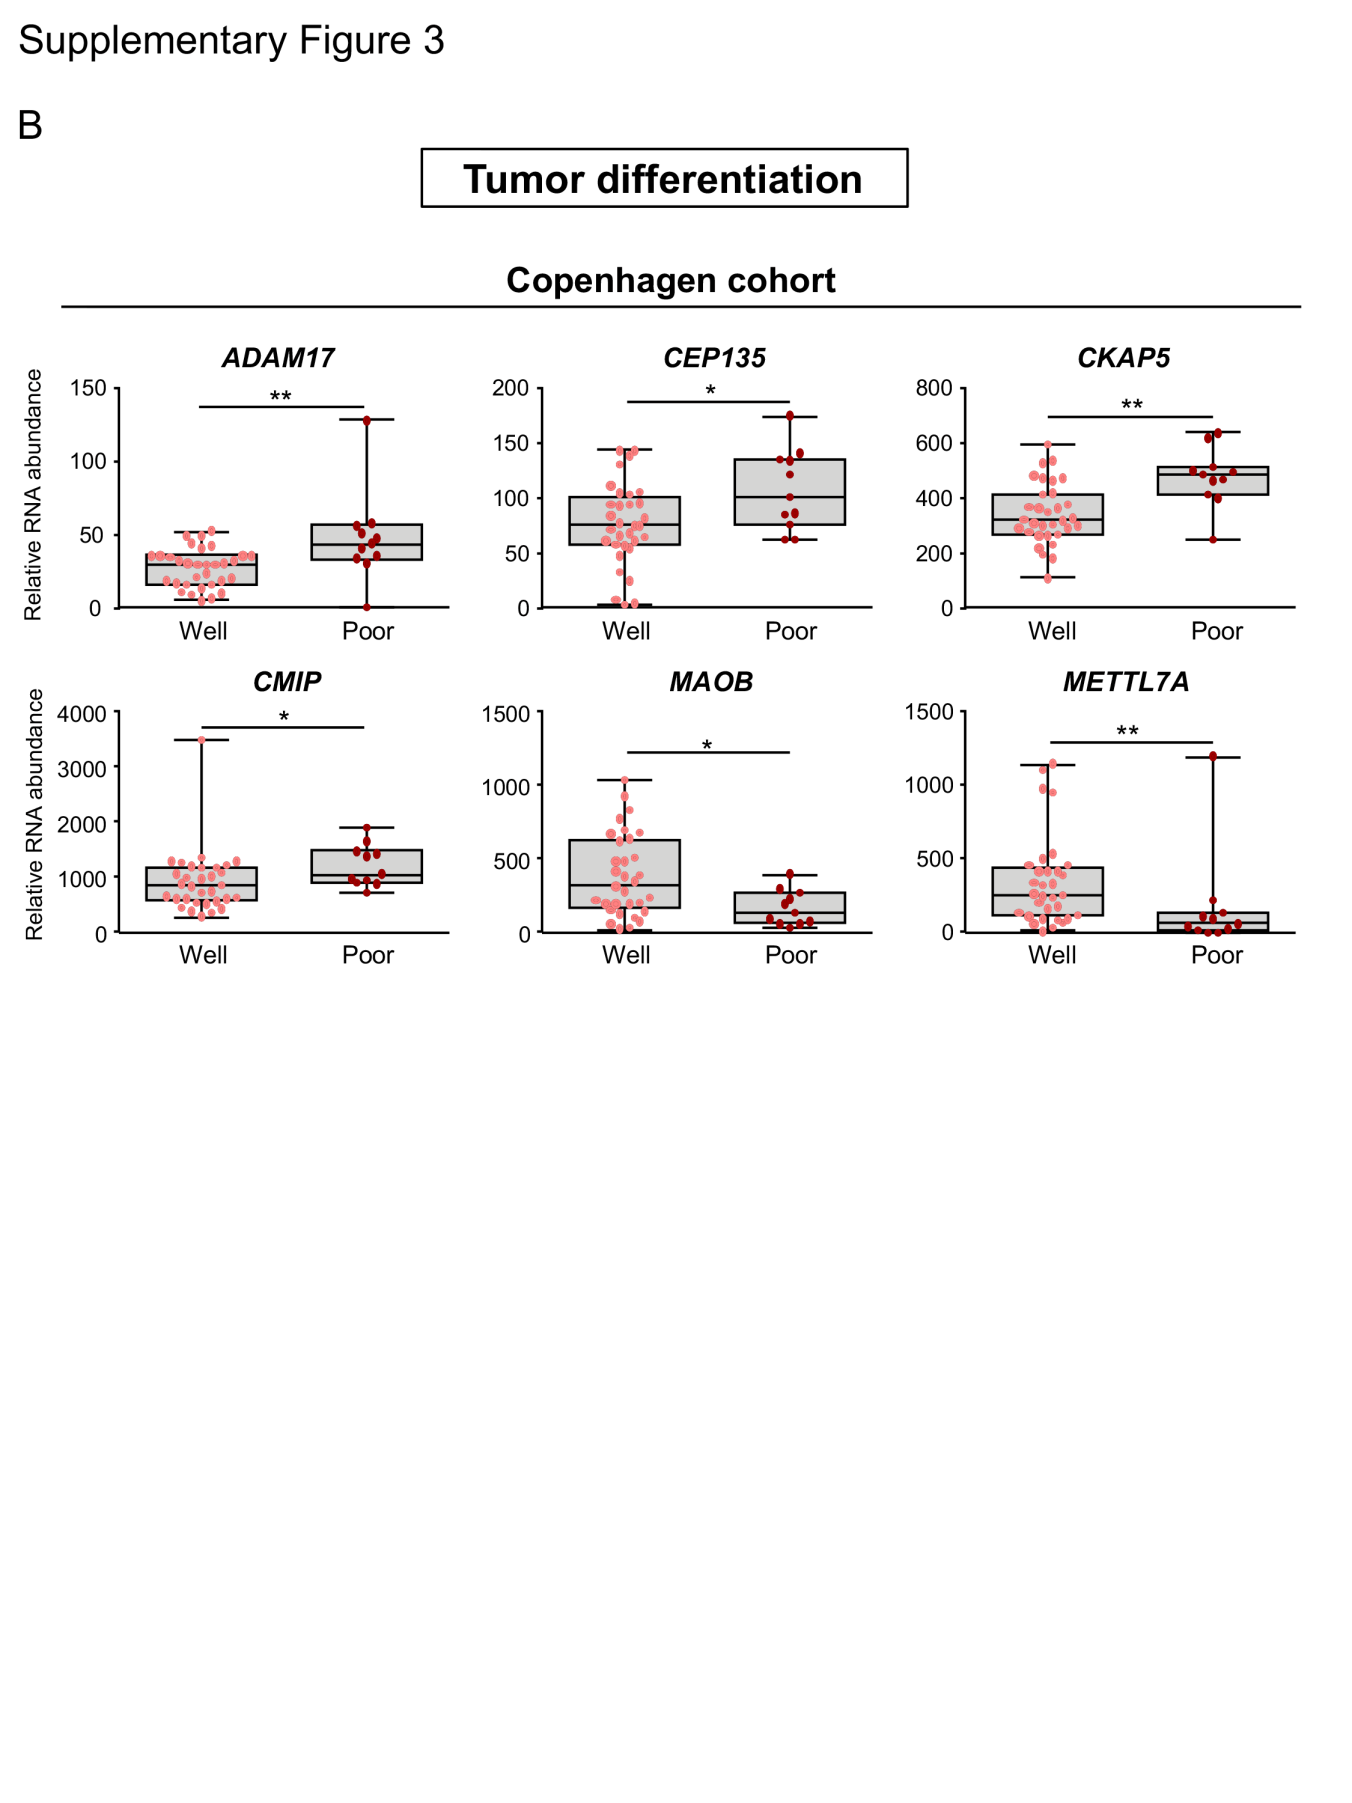
**

**Supplementary Figure 3 (continued) – Comparative analysis of the levels of candidate serum liquid biopsy transcripts with CCA disease severity in the Copenhagen and TCGA cohorts. B)** Tumour differentiation. Abbreviations: Well, well + well to moderate + moderate tumor differentiation; Poor, moderate to poor + poor differentiation.

**
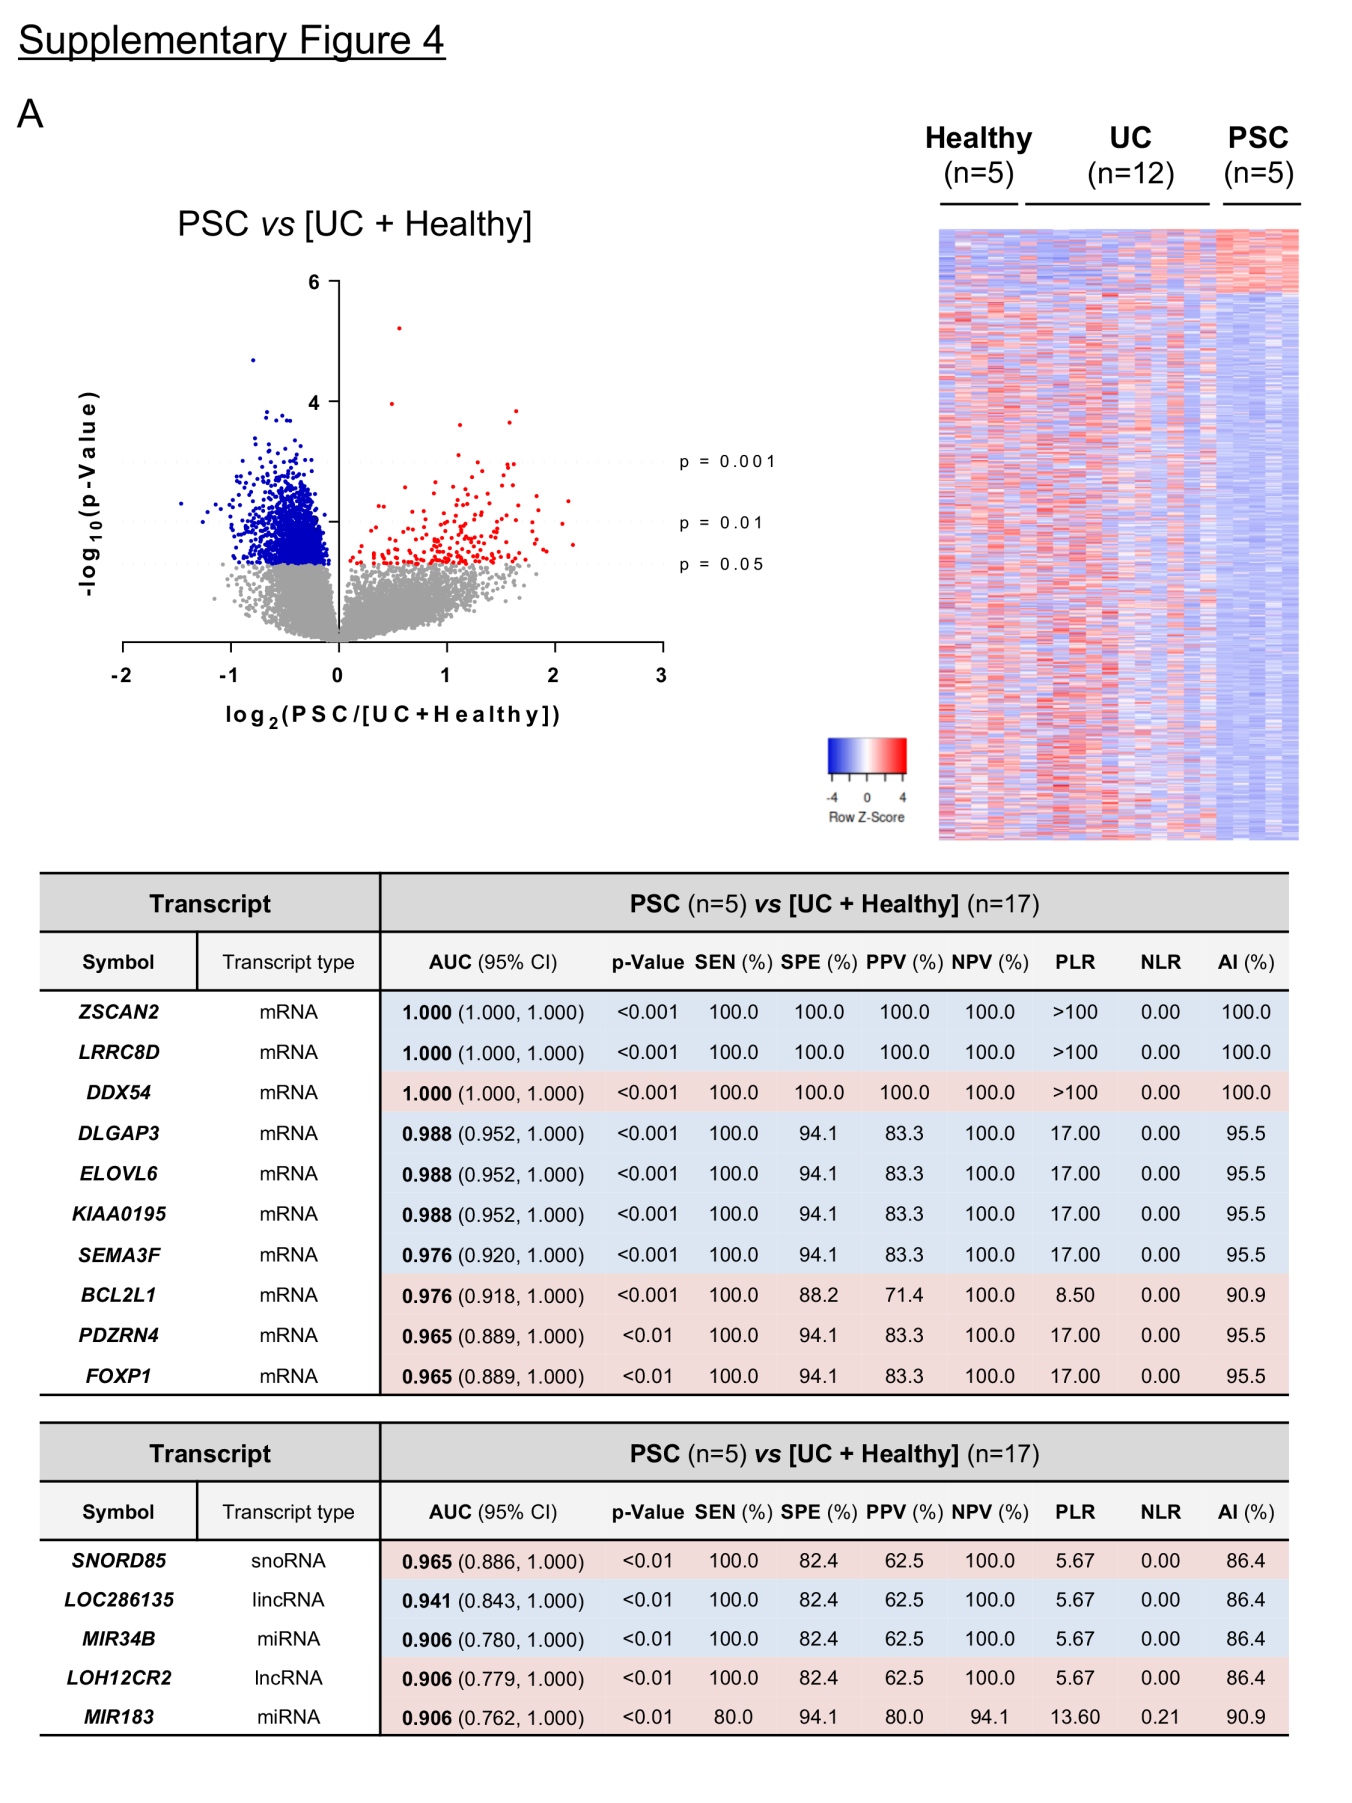
**

**Supplementary Figure 4 – Differential transcriptomic profile and diagnostic efficacy of urine EV transcripts. A)** Volcano plot [-log10(p-value) and log2(fold-change); up left], heatmap of the differentially expressed transcripts (up right) and diagrams with the diagnostic capacity with the highest AUC values of the 10 selected mRNAs and 5 selected non-coding RNAs in serum EVs from PSC *vs* [UC + Healthy individuals]. Abbreviations: AI, accuracy index; AUC, area under the receiver operating characteristic curve; CI, confidence interval; lncRNA, long non-coding RNA; miRNA, microRNA; NLR, negative likelihood ratio; NPV, negative predictive value; PLR, positive likelihood ratio; PPV, positive predictive value; SEN, sensitivity; snoRNA, small nucleolar RNA; SPE, specificity;

**
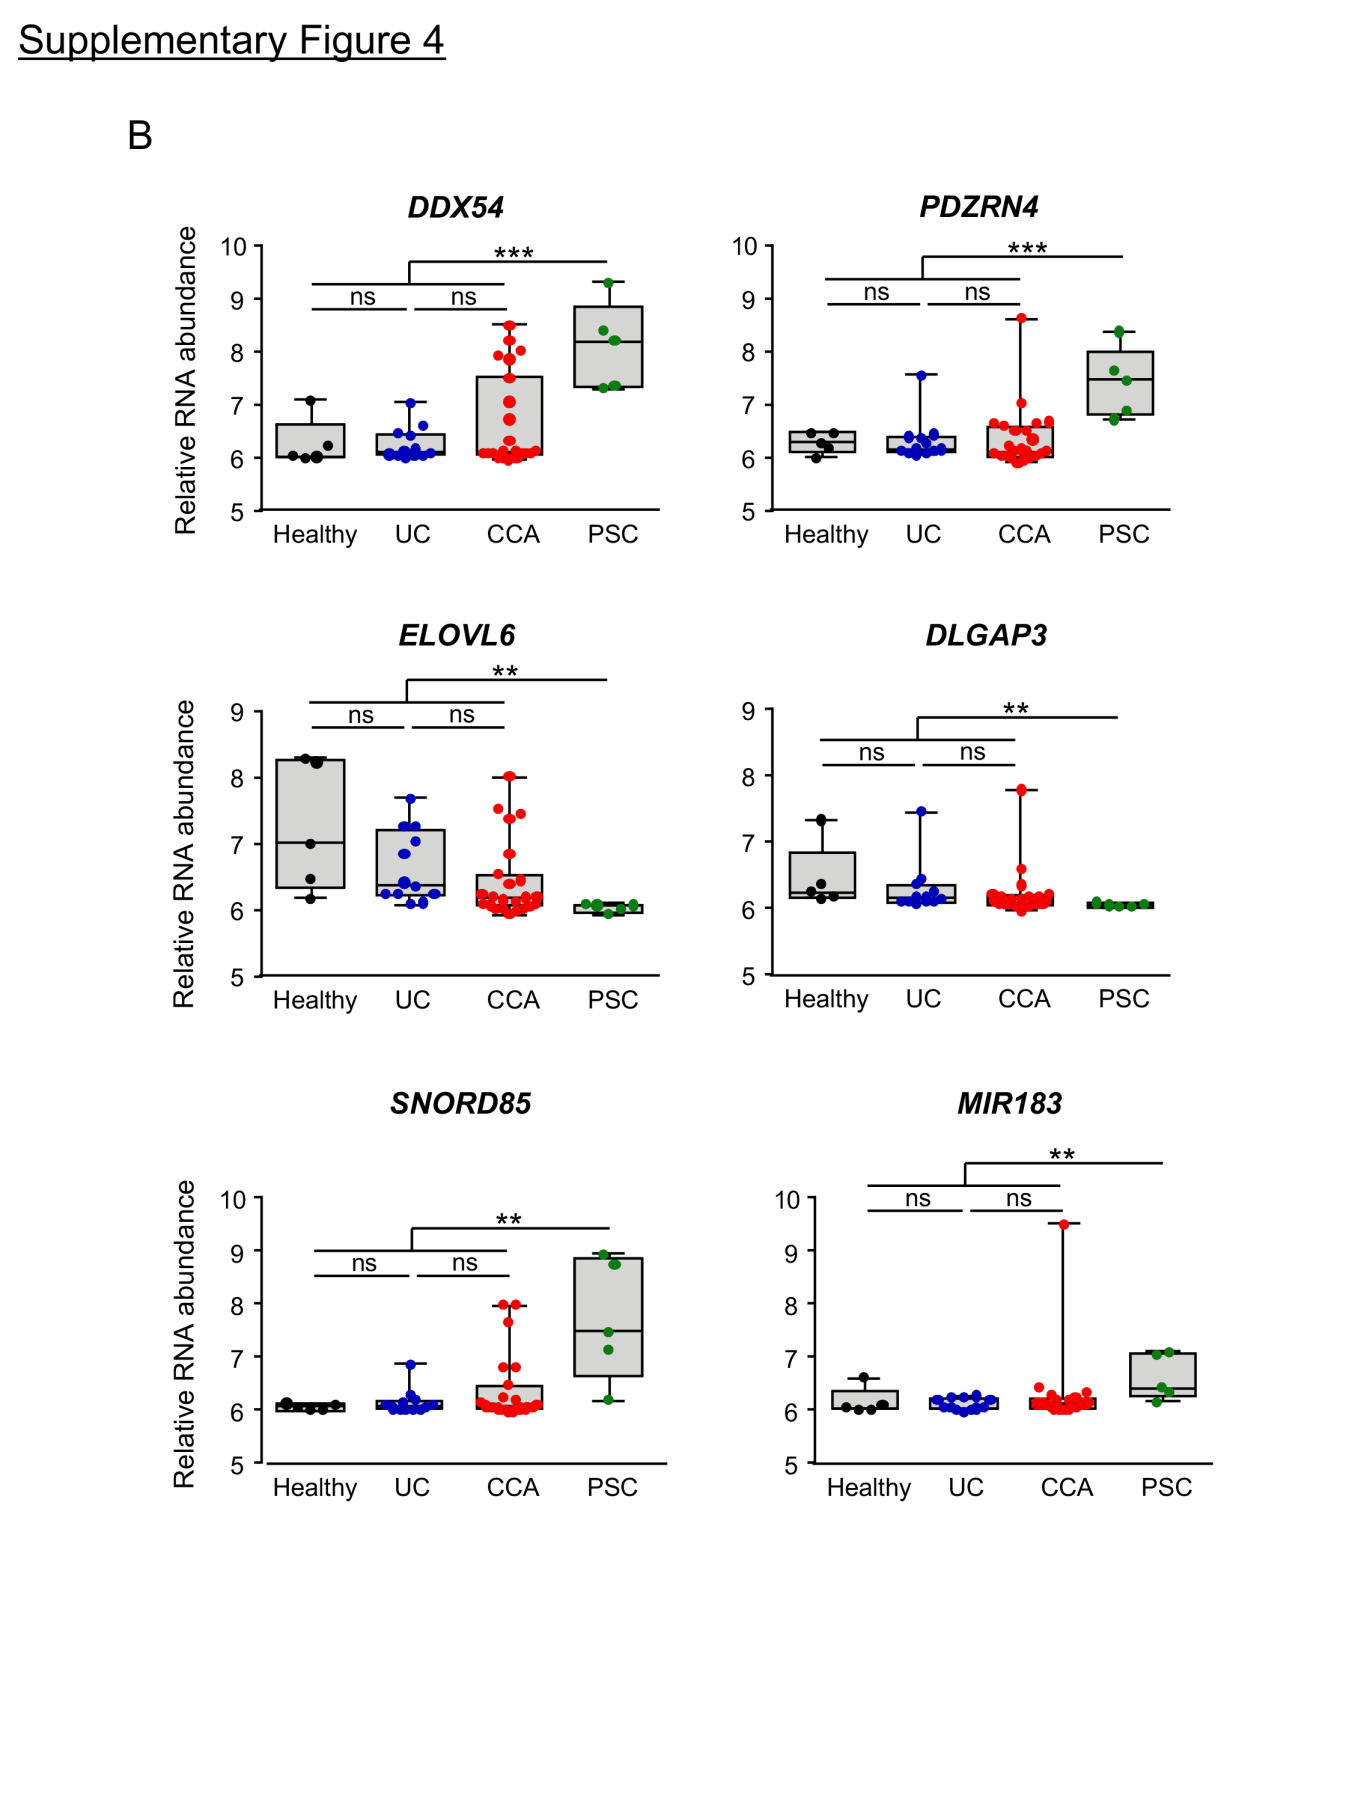
**

**Supplementary Figure 4 (continued) – Differential transcriptomic profile and diagnostic efficacy of urine EV transcripts. B)** Potential serum EV biomarkers for PSC.

**
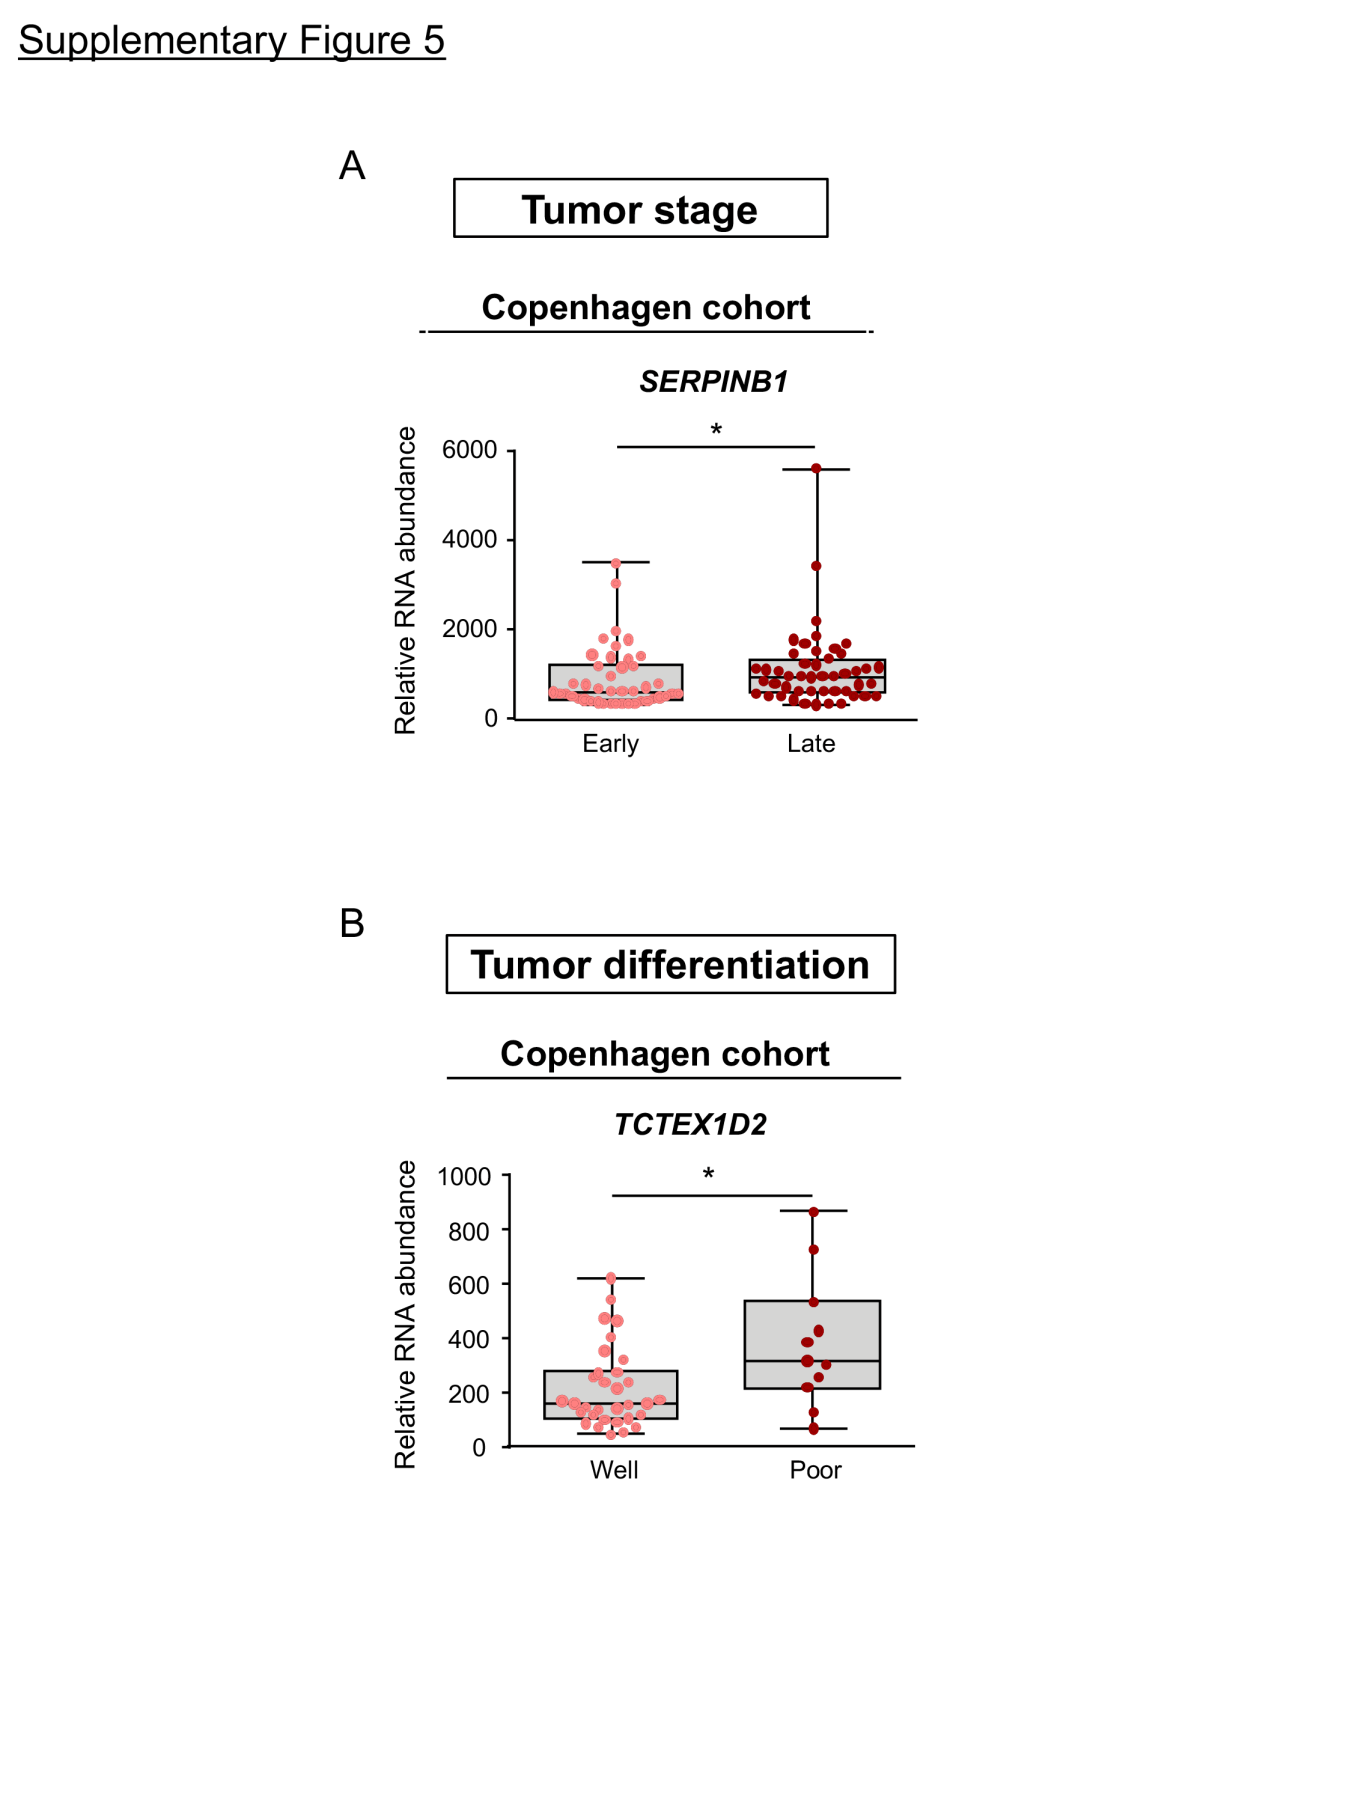
**

**Supplementary Figure 5 – Comparative analysis of the levels of candidate urine liquid biopsy transcripts with CCA disease severity in the Copenhagen and TCGA cohorts. A)** Tumour stage**; B)** Tumour differentiation. Abbreviations: Early, T1/2 tumor stage; Late, T3/4 tumor stage; Well, well + well to moderate + moderate tumor differentiation; Poor, moderate to poor + poor differentiation.

**Supplementary Table 1: Clinical information from study individuals**

**
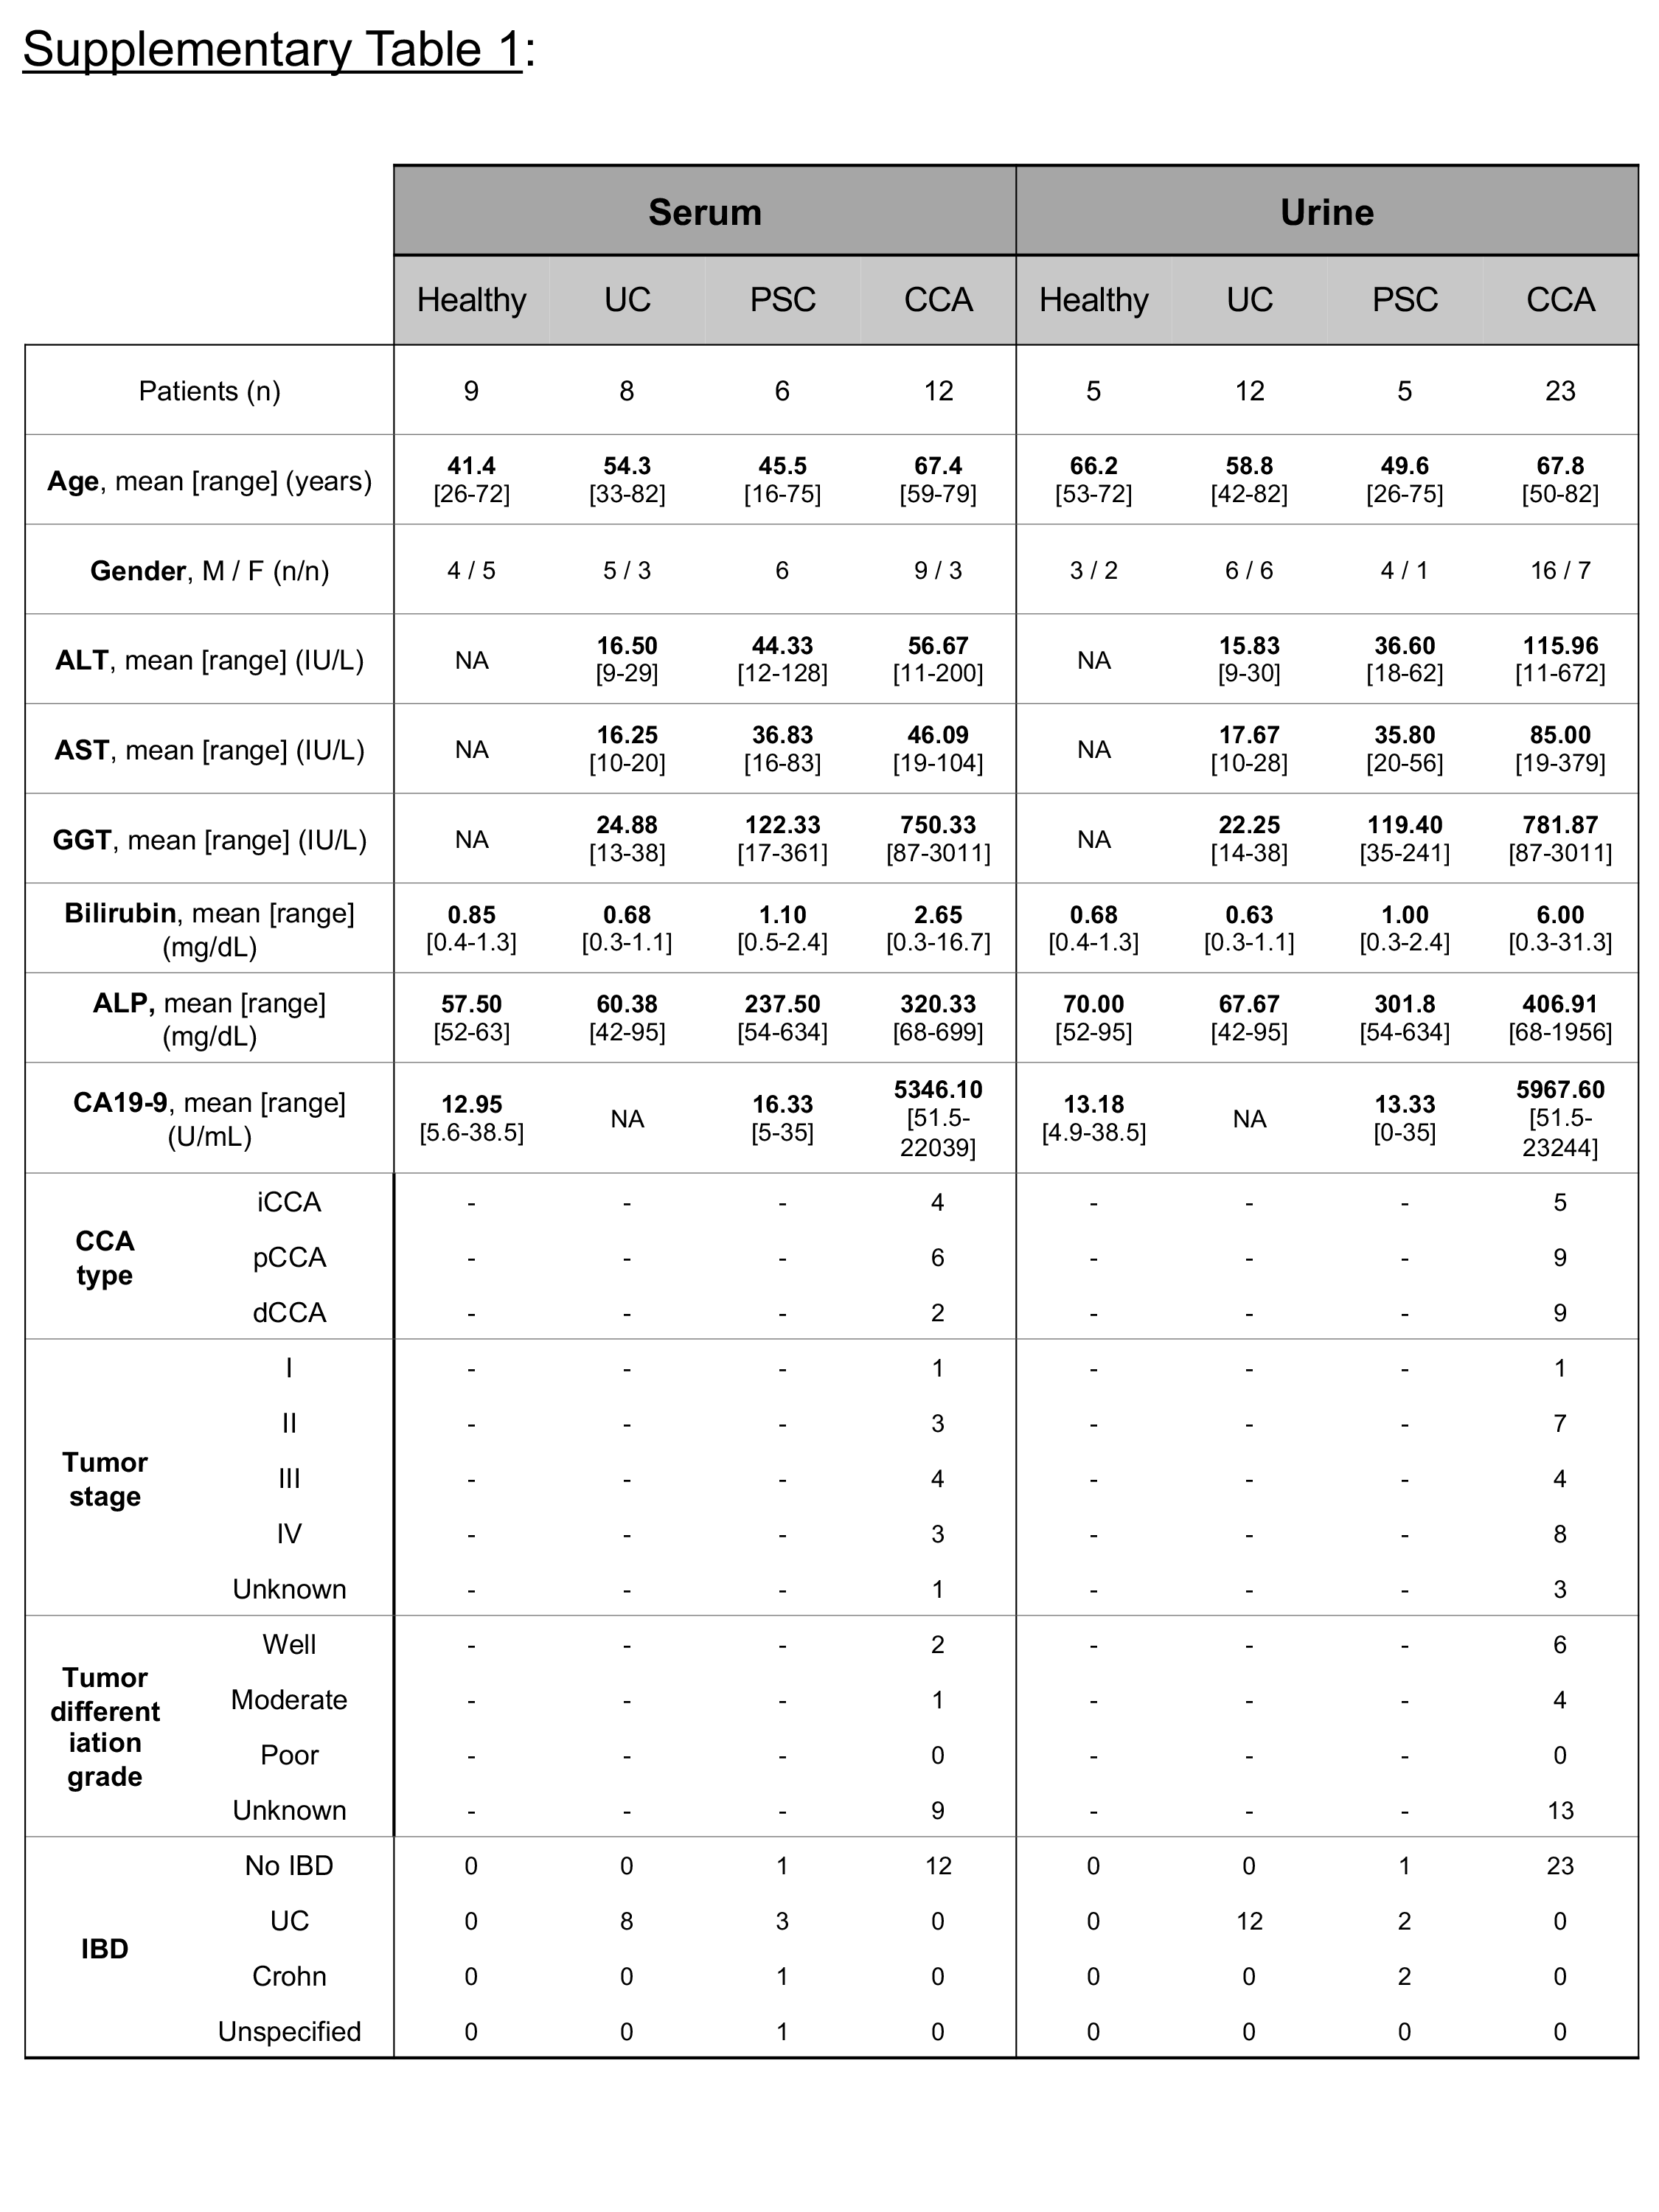
**

**Supplementary Table 2: Number of transcripts identified in each experimental group**

**
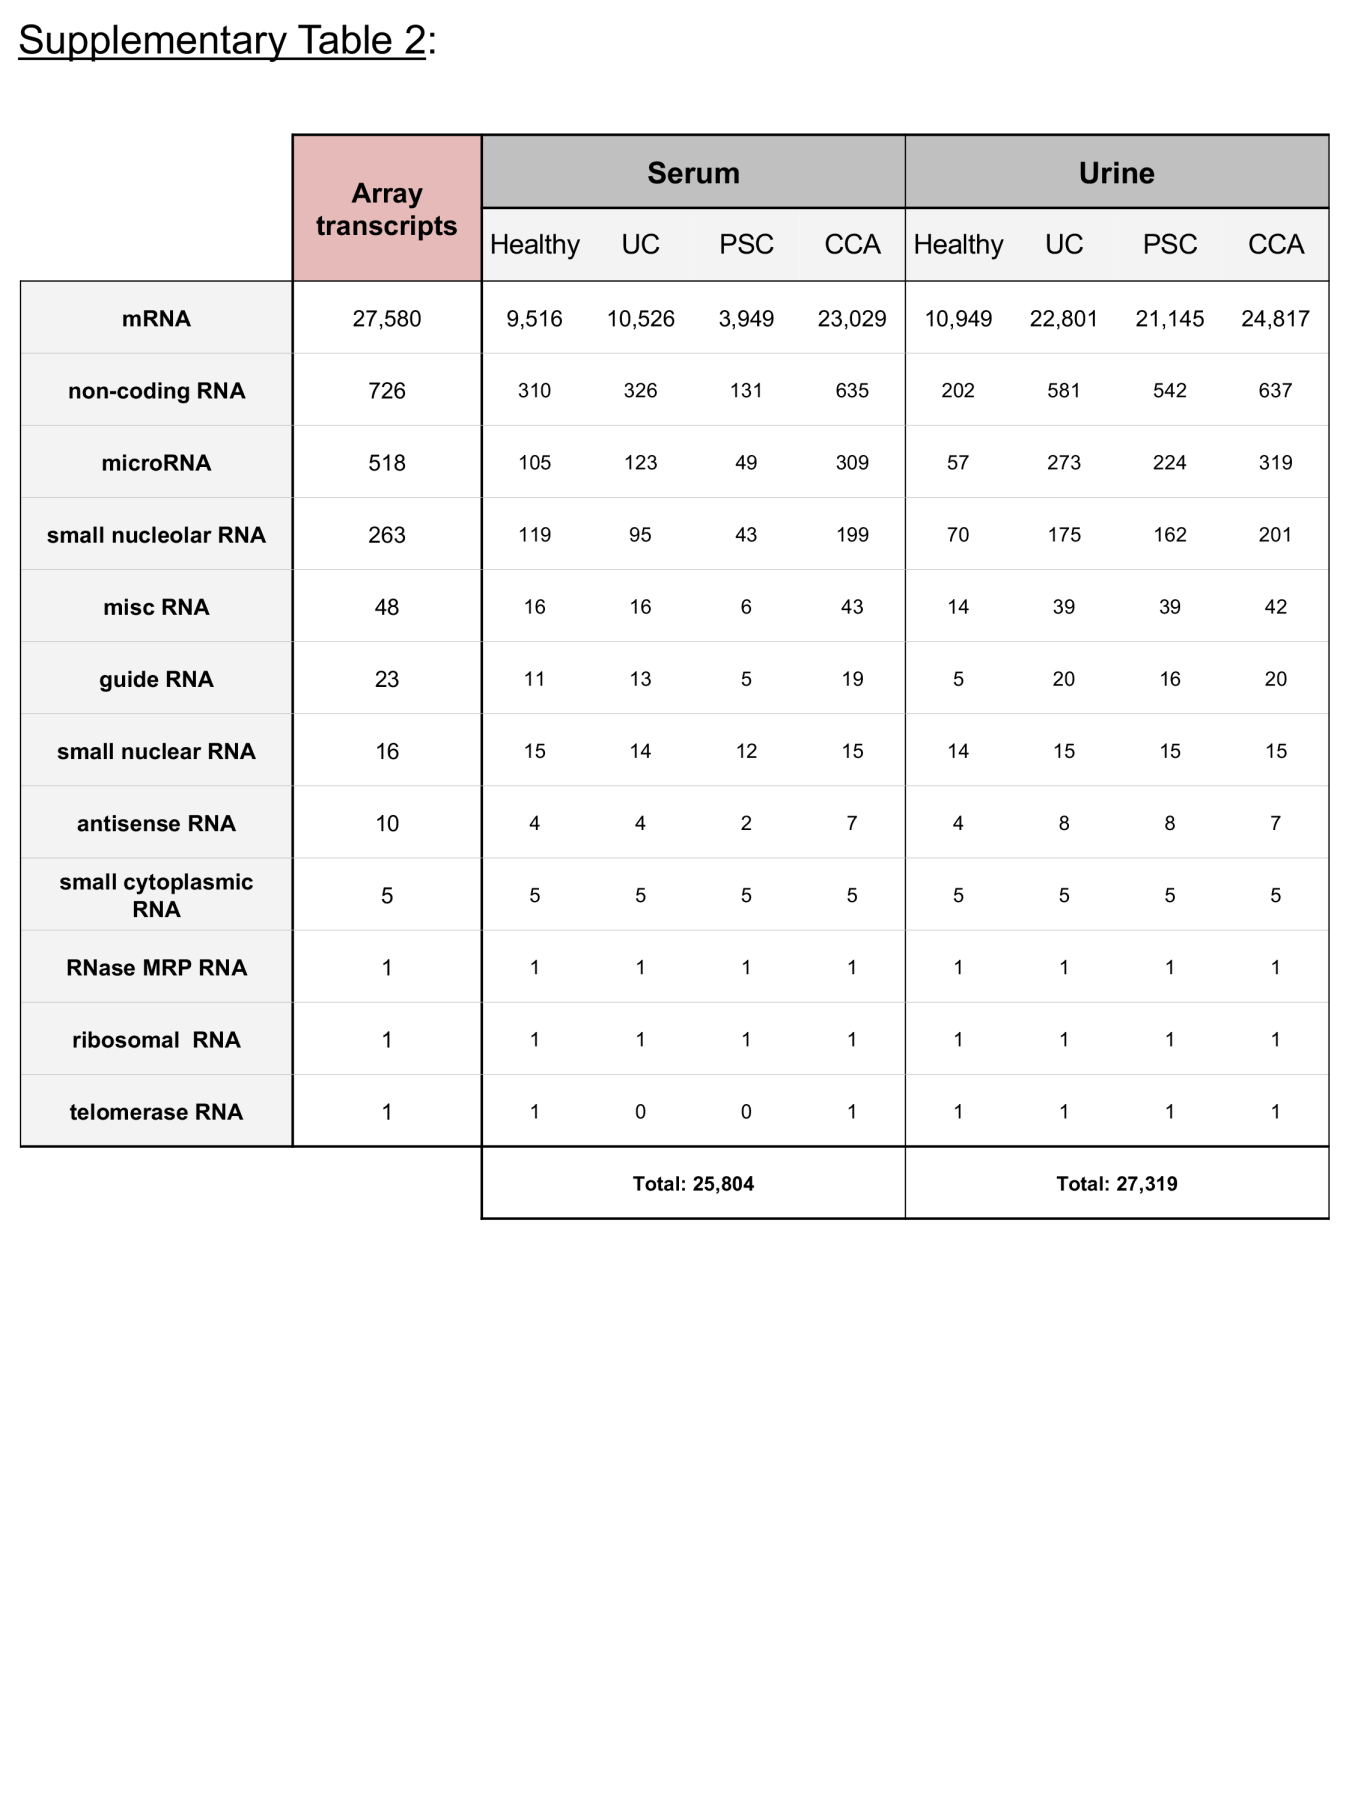
**
