# Supplementary figures and images for: Patients with Cholangiocarcinoma Present Specific RNA Profiles in Serum and Urine Extracellular Vesicles Mirroring the Tumor Expression: Novel Liquid Biopsy Biomarkers for Disease Diagnosis
Source: MDPI journal article supplement (doi:10.3390/cells9030721), 2020-03-14

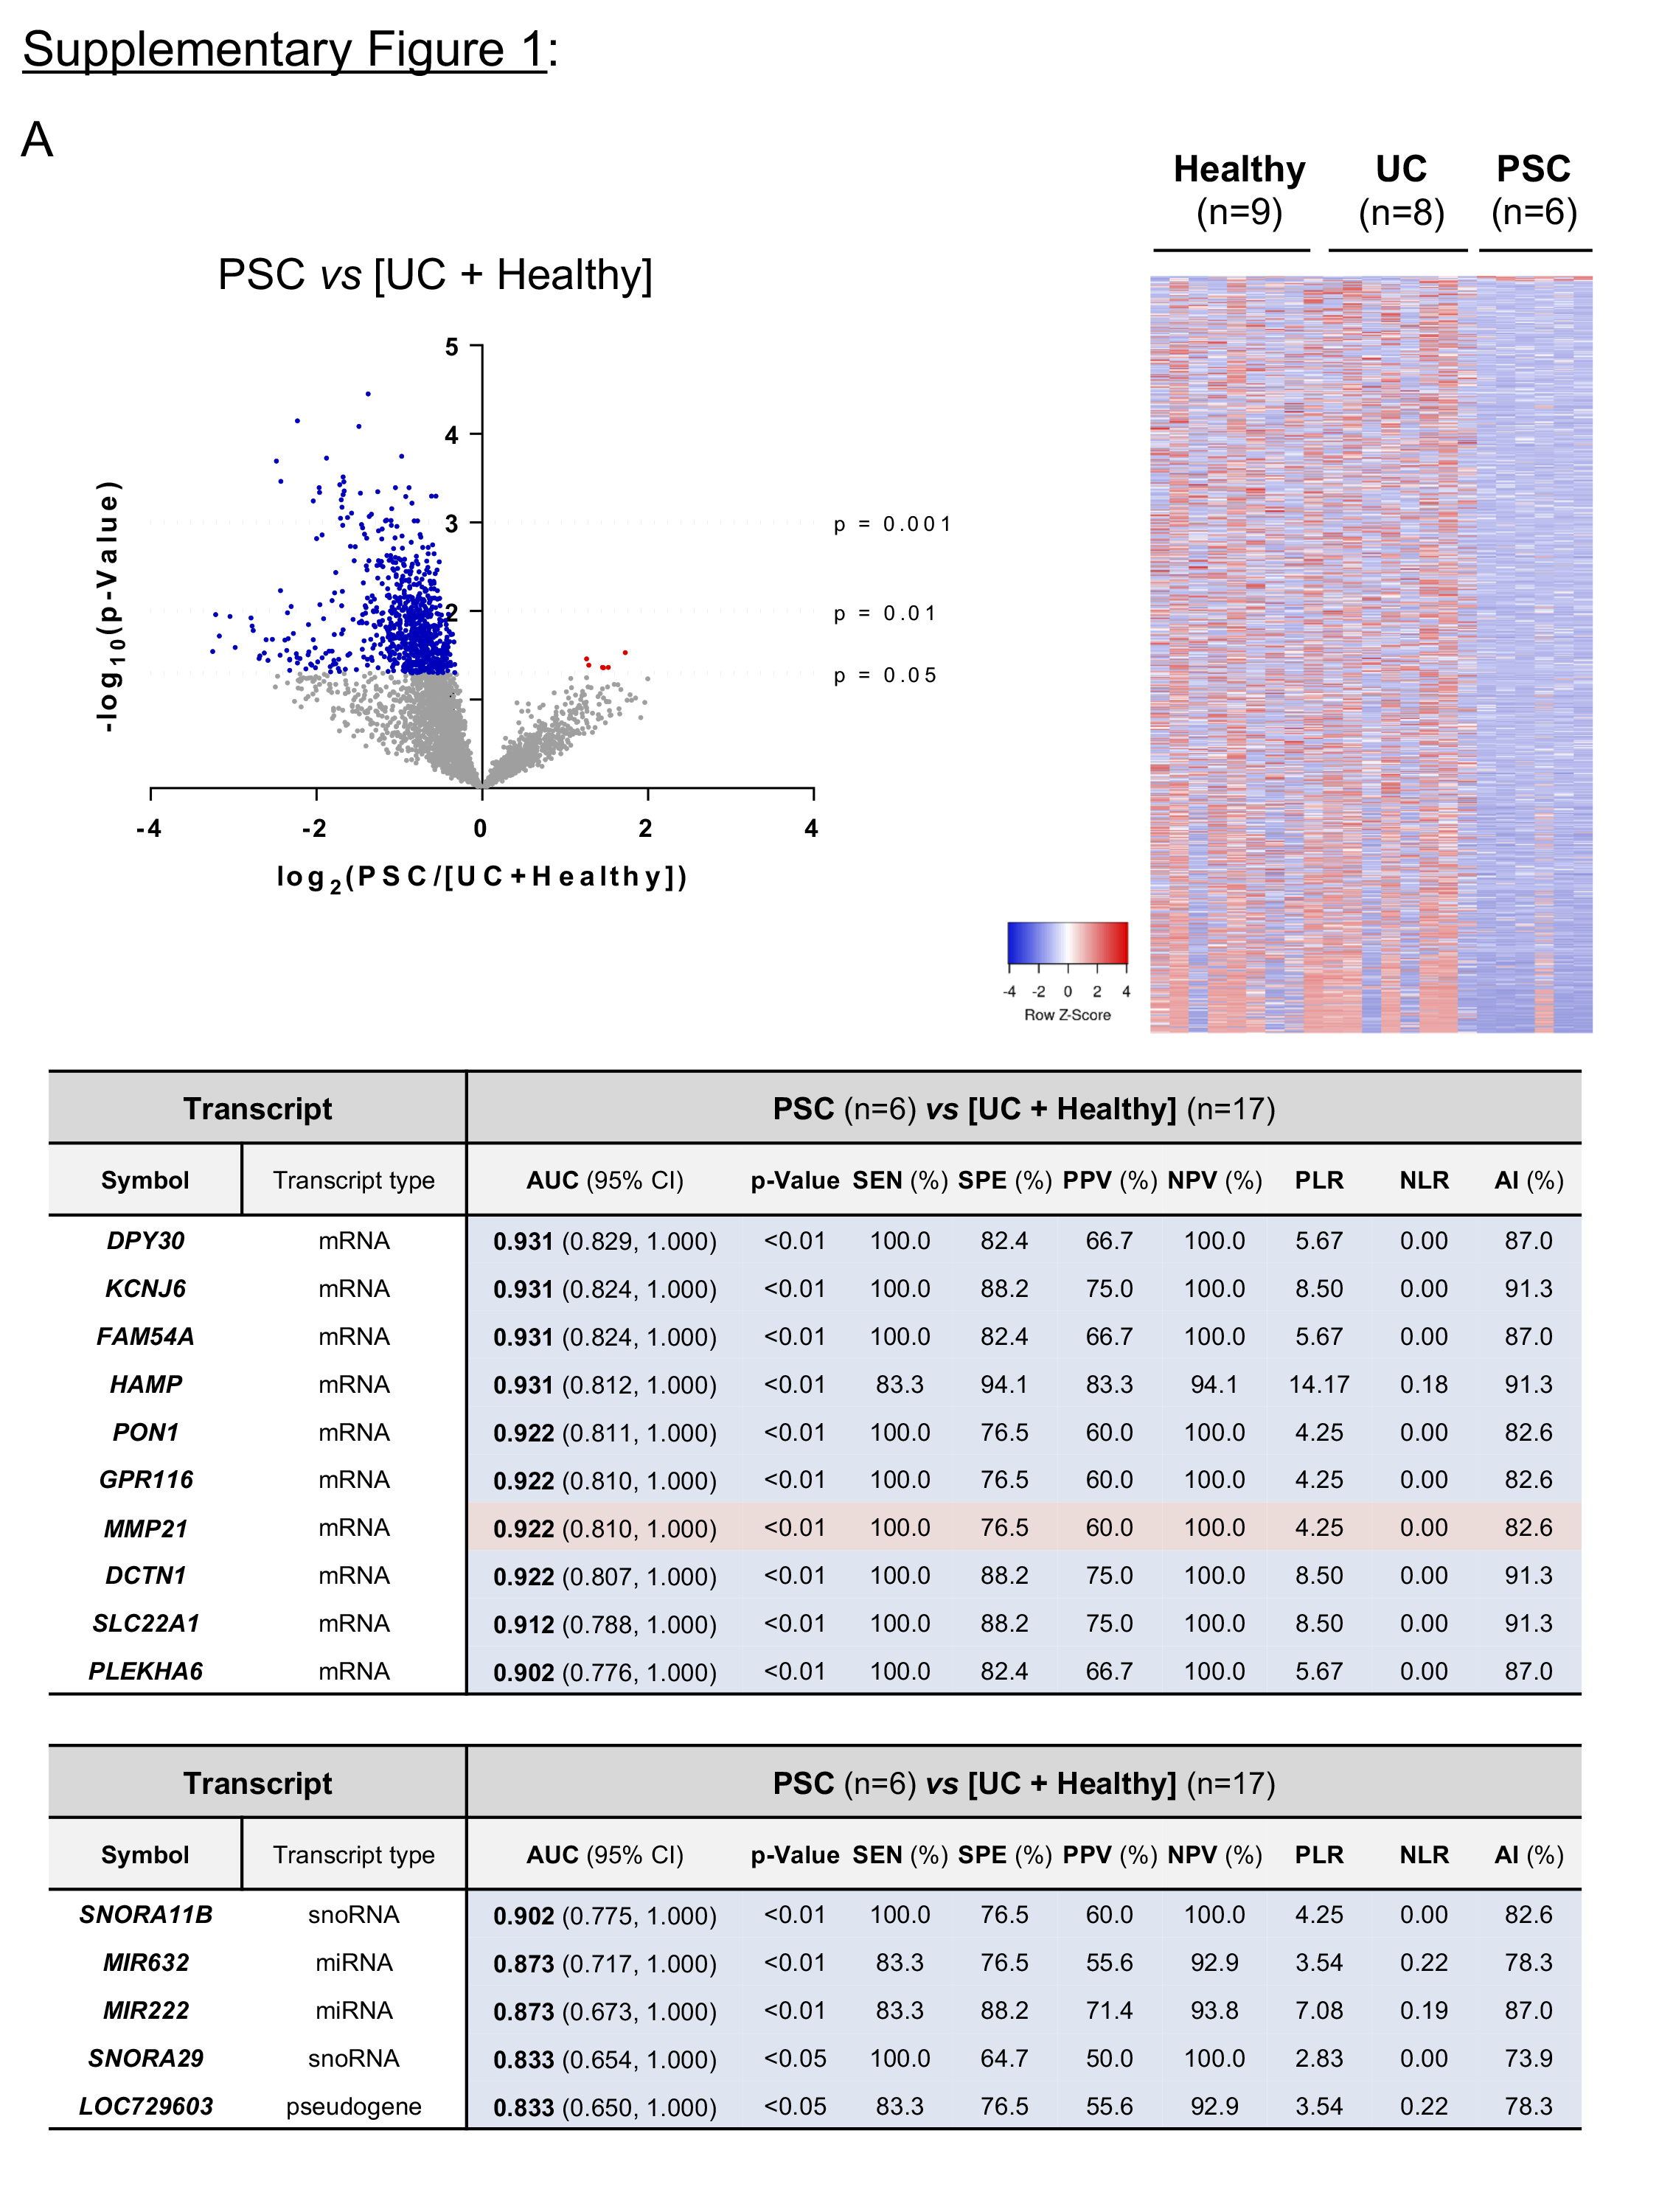

Supplement: s1 [file s1 › Suppl Fig 1A.tif]

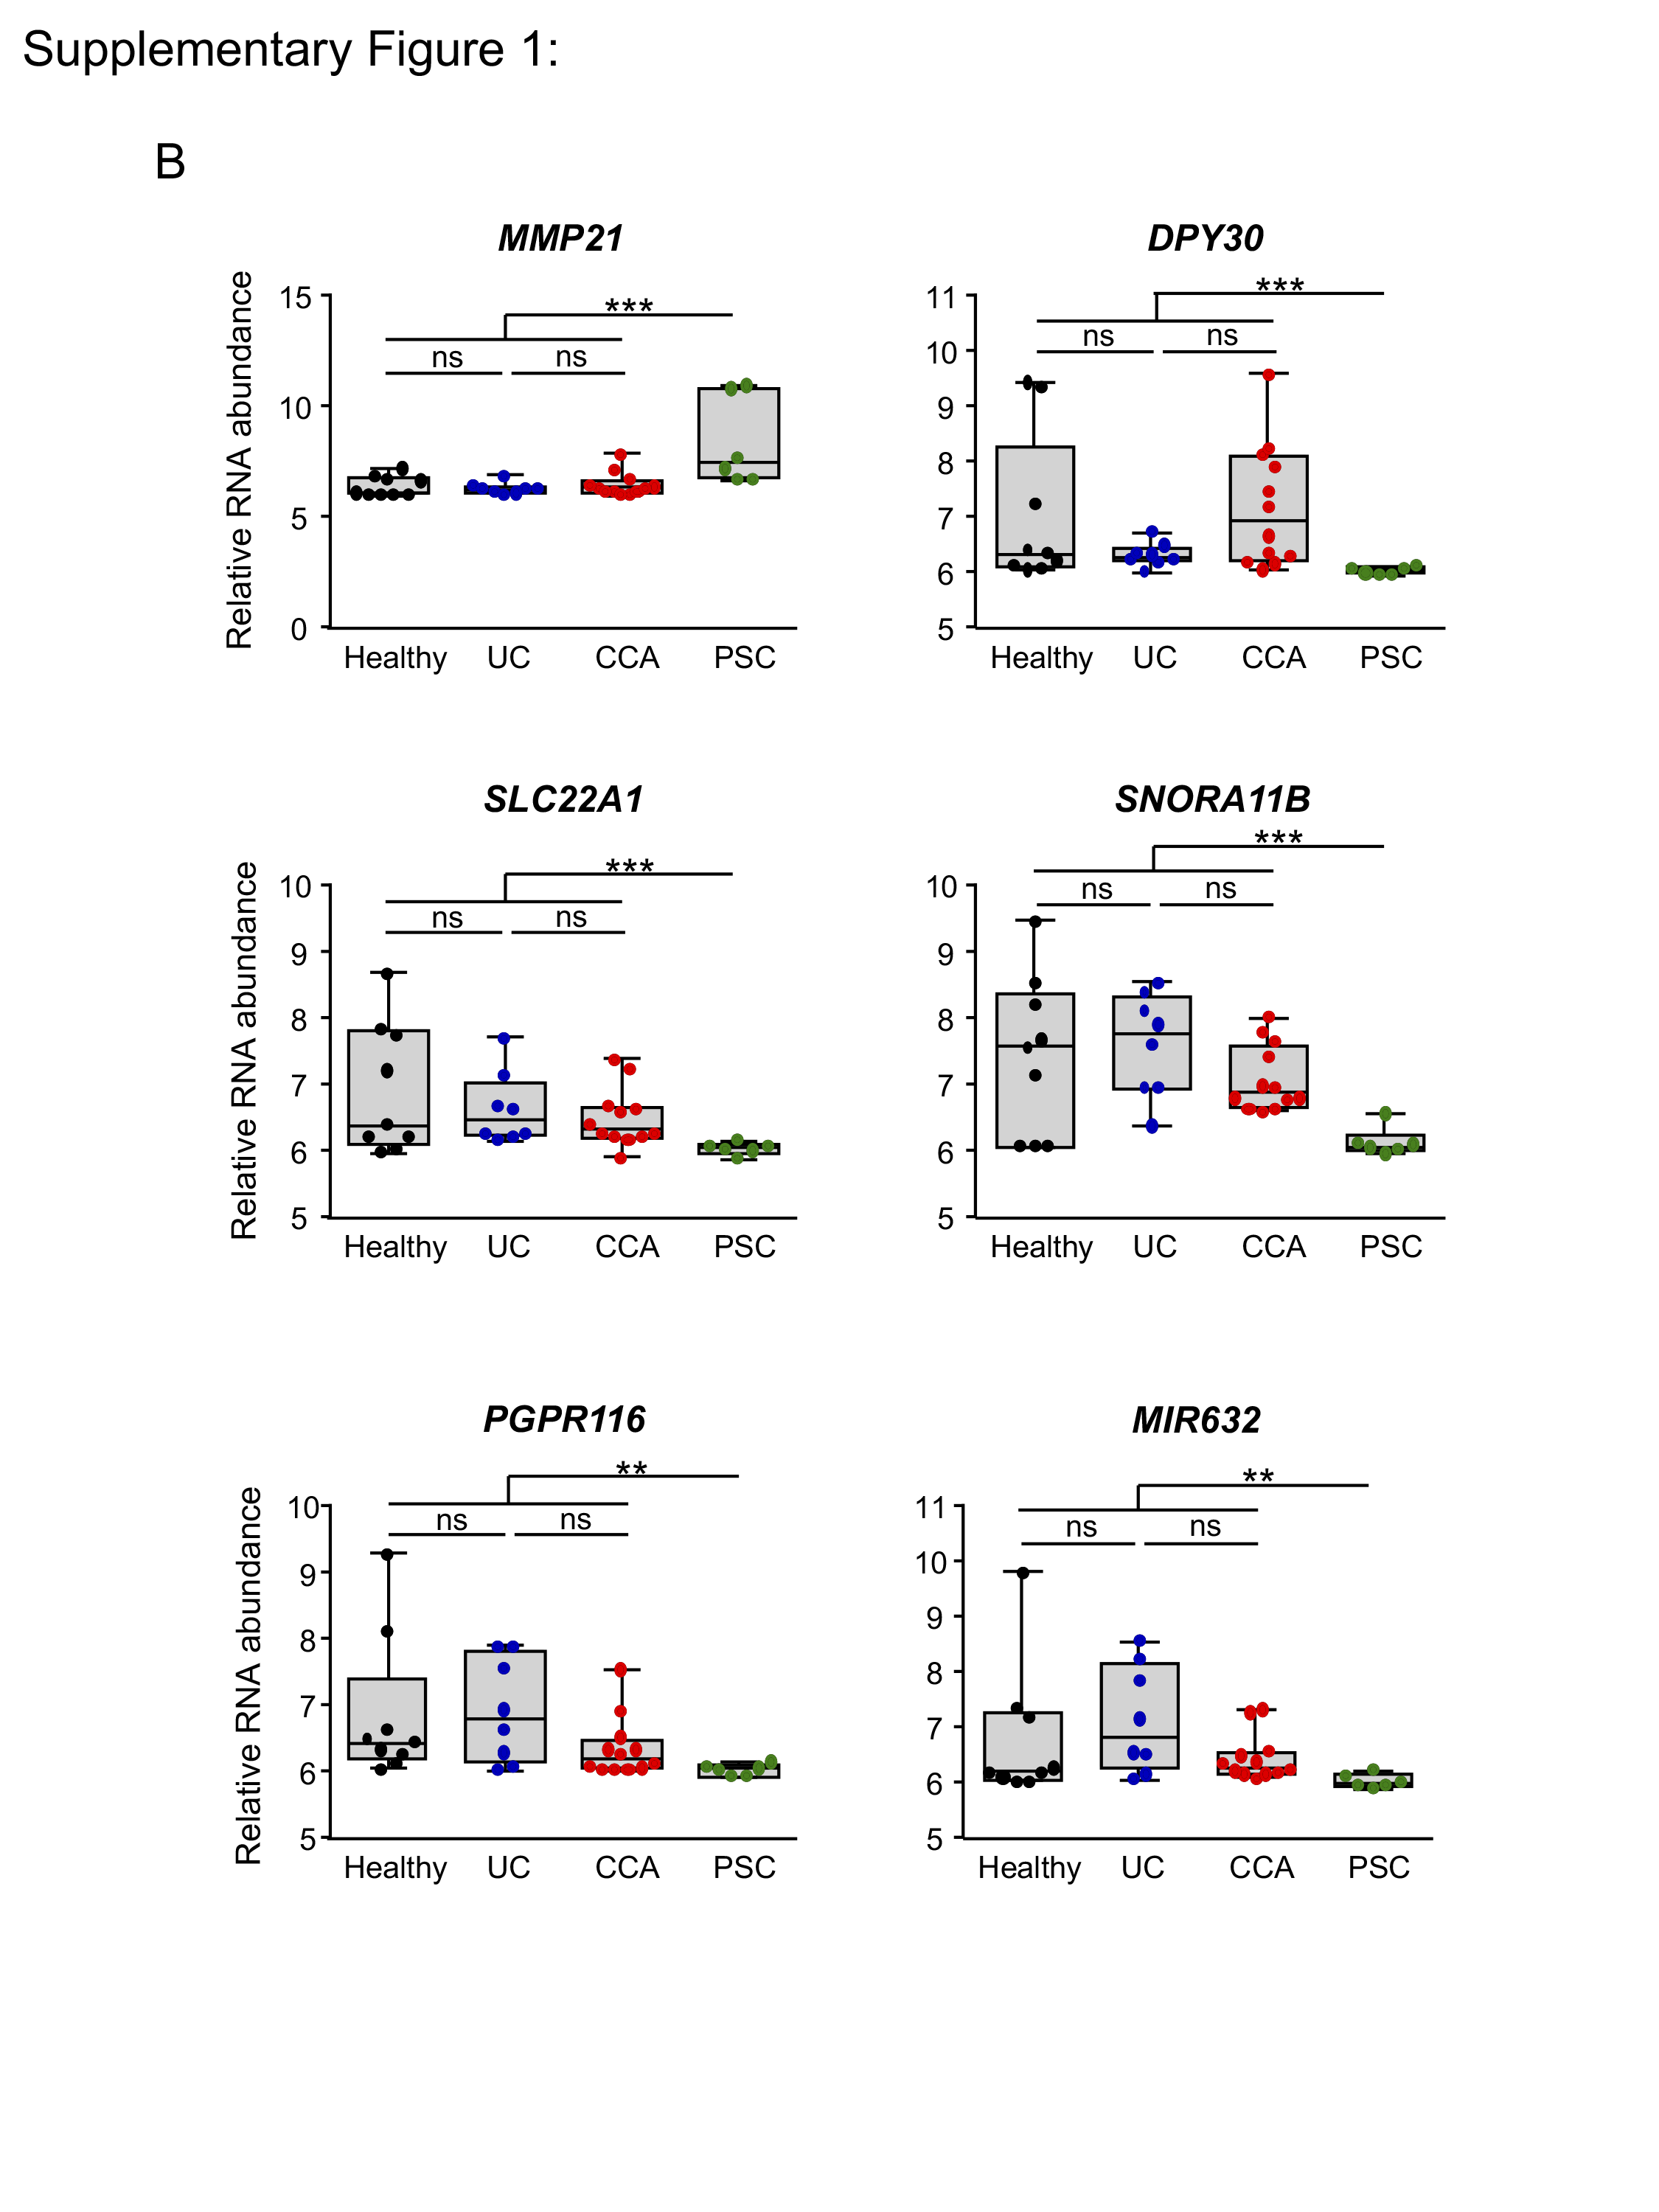

Supplement: s1 [file s1 › Suppl Fig 1B.tif]

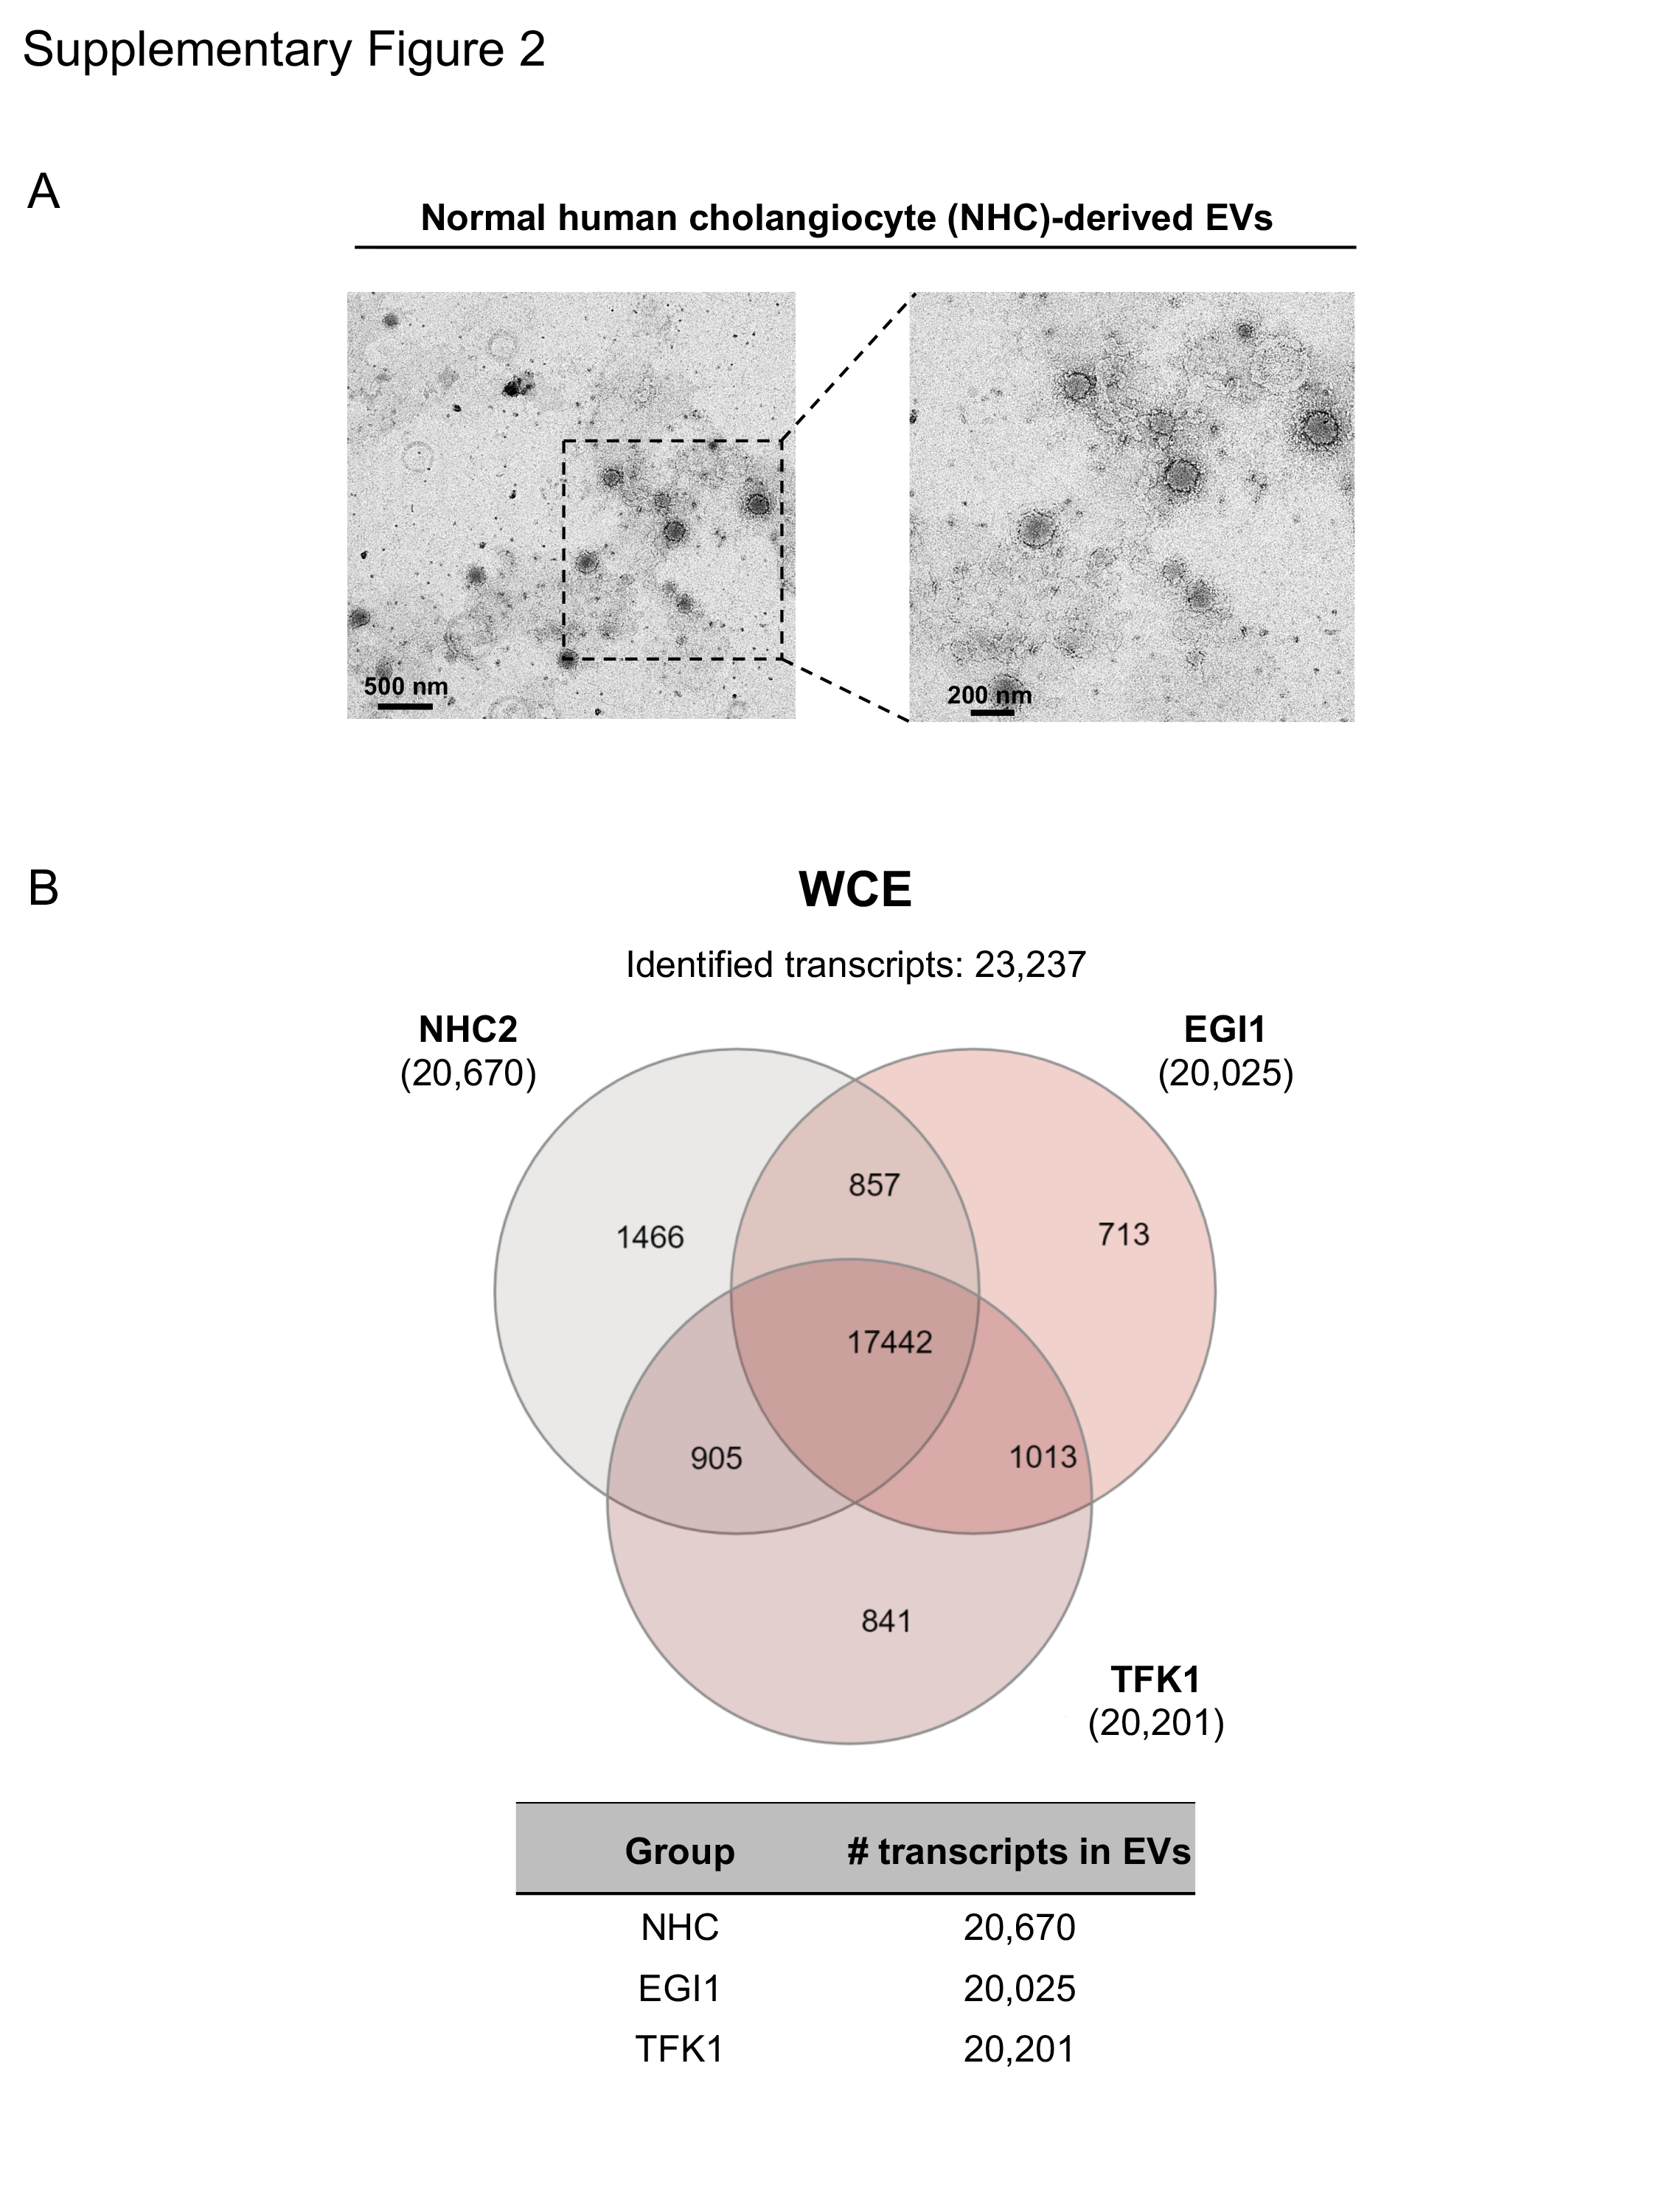

Supplement: s1 [file s1 › Suppl Fig 2A,B.tif]

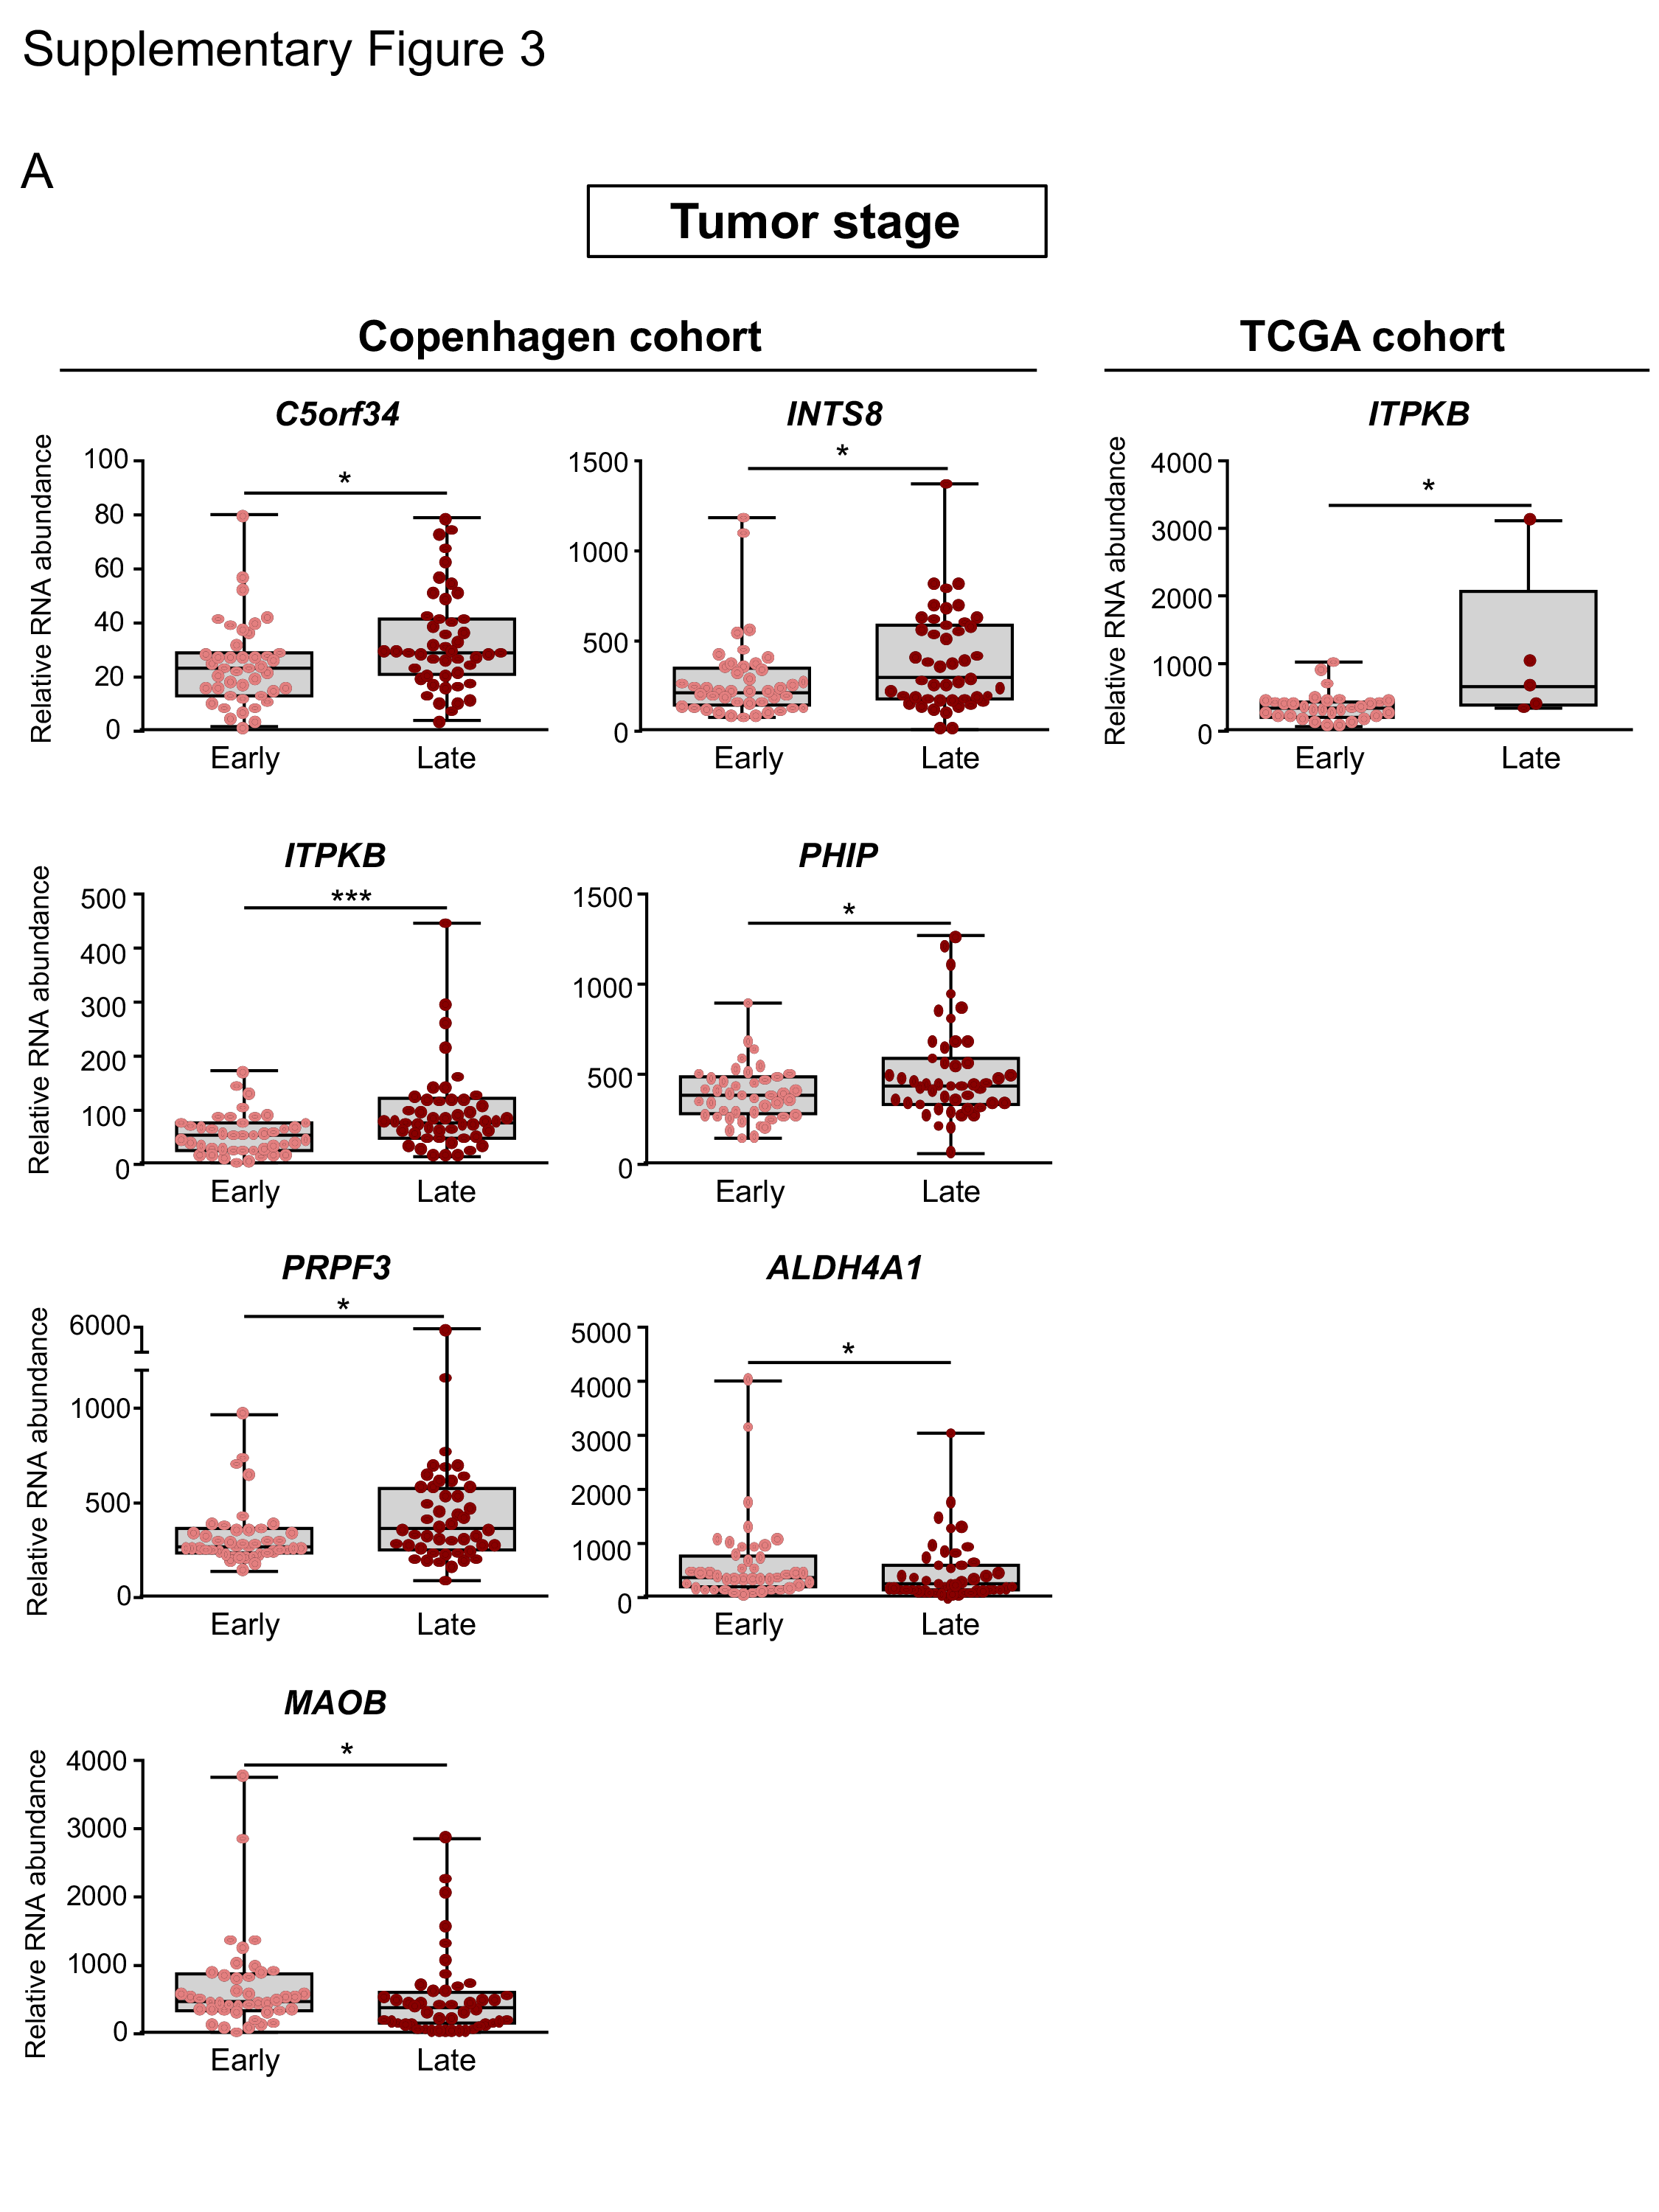

Supplement: s1 [file s1 › Suppl Fig 3A.tif]

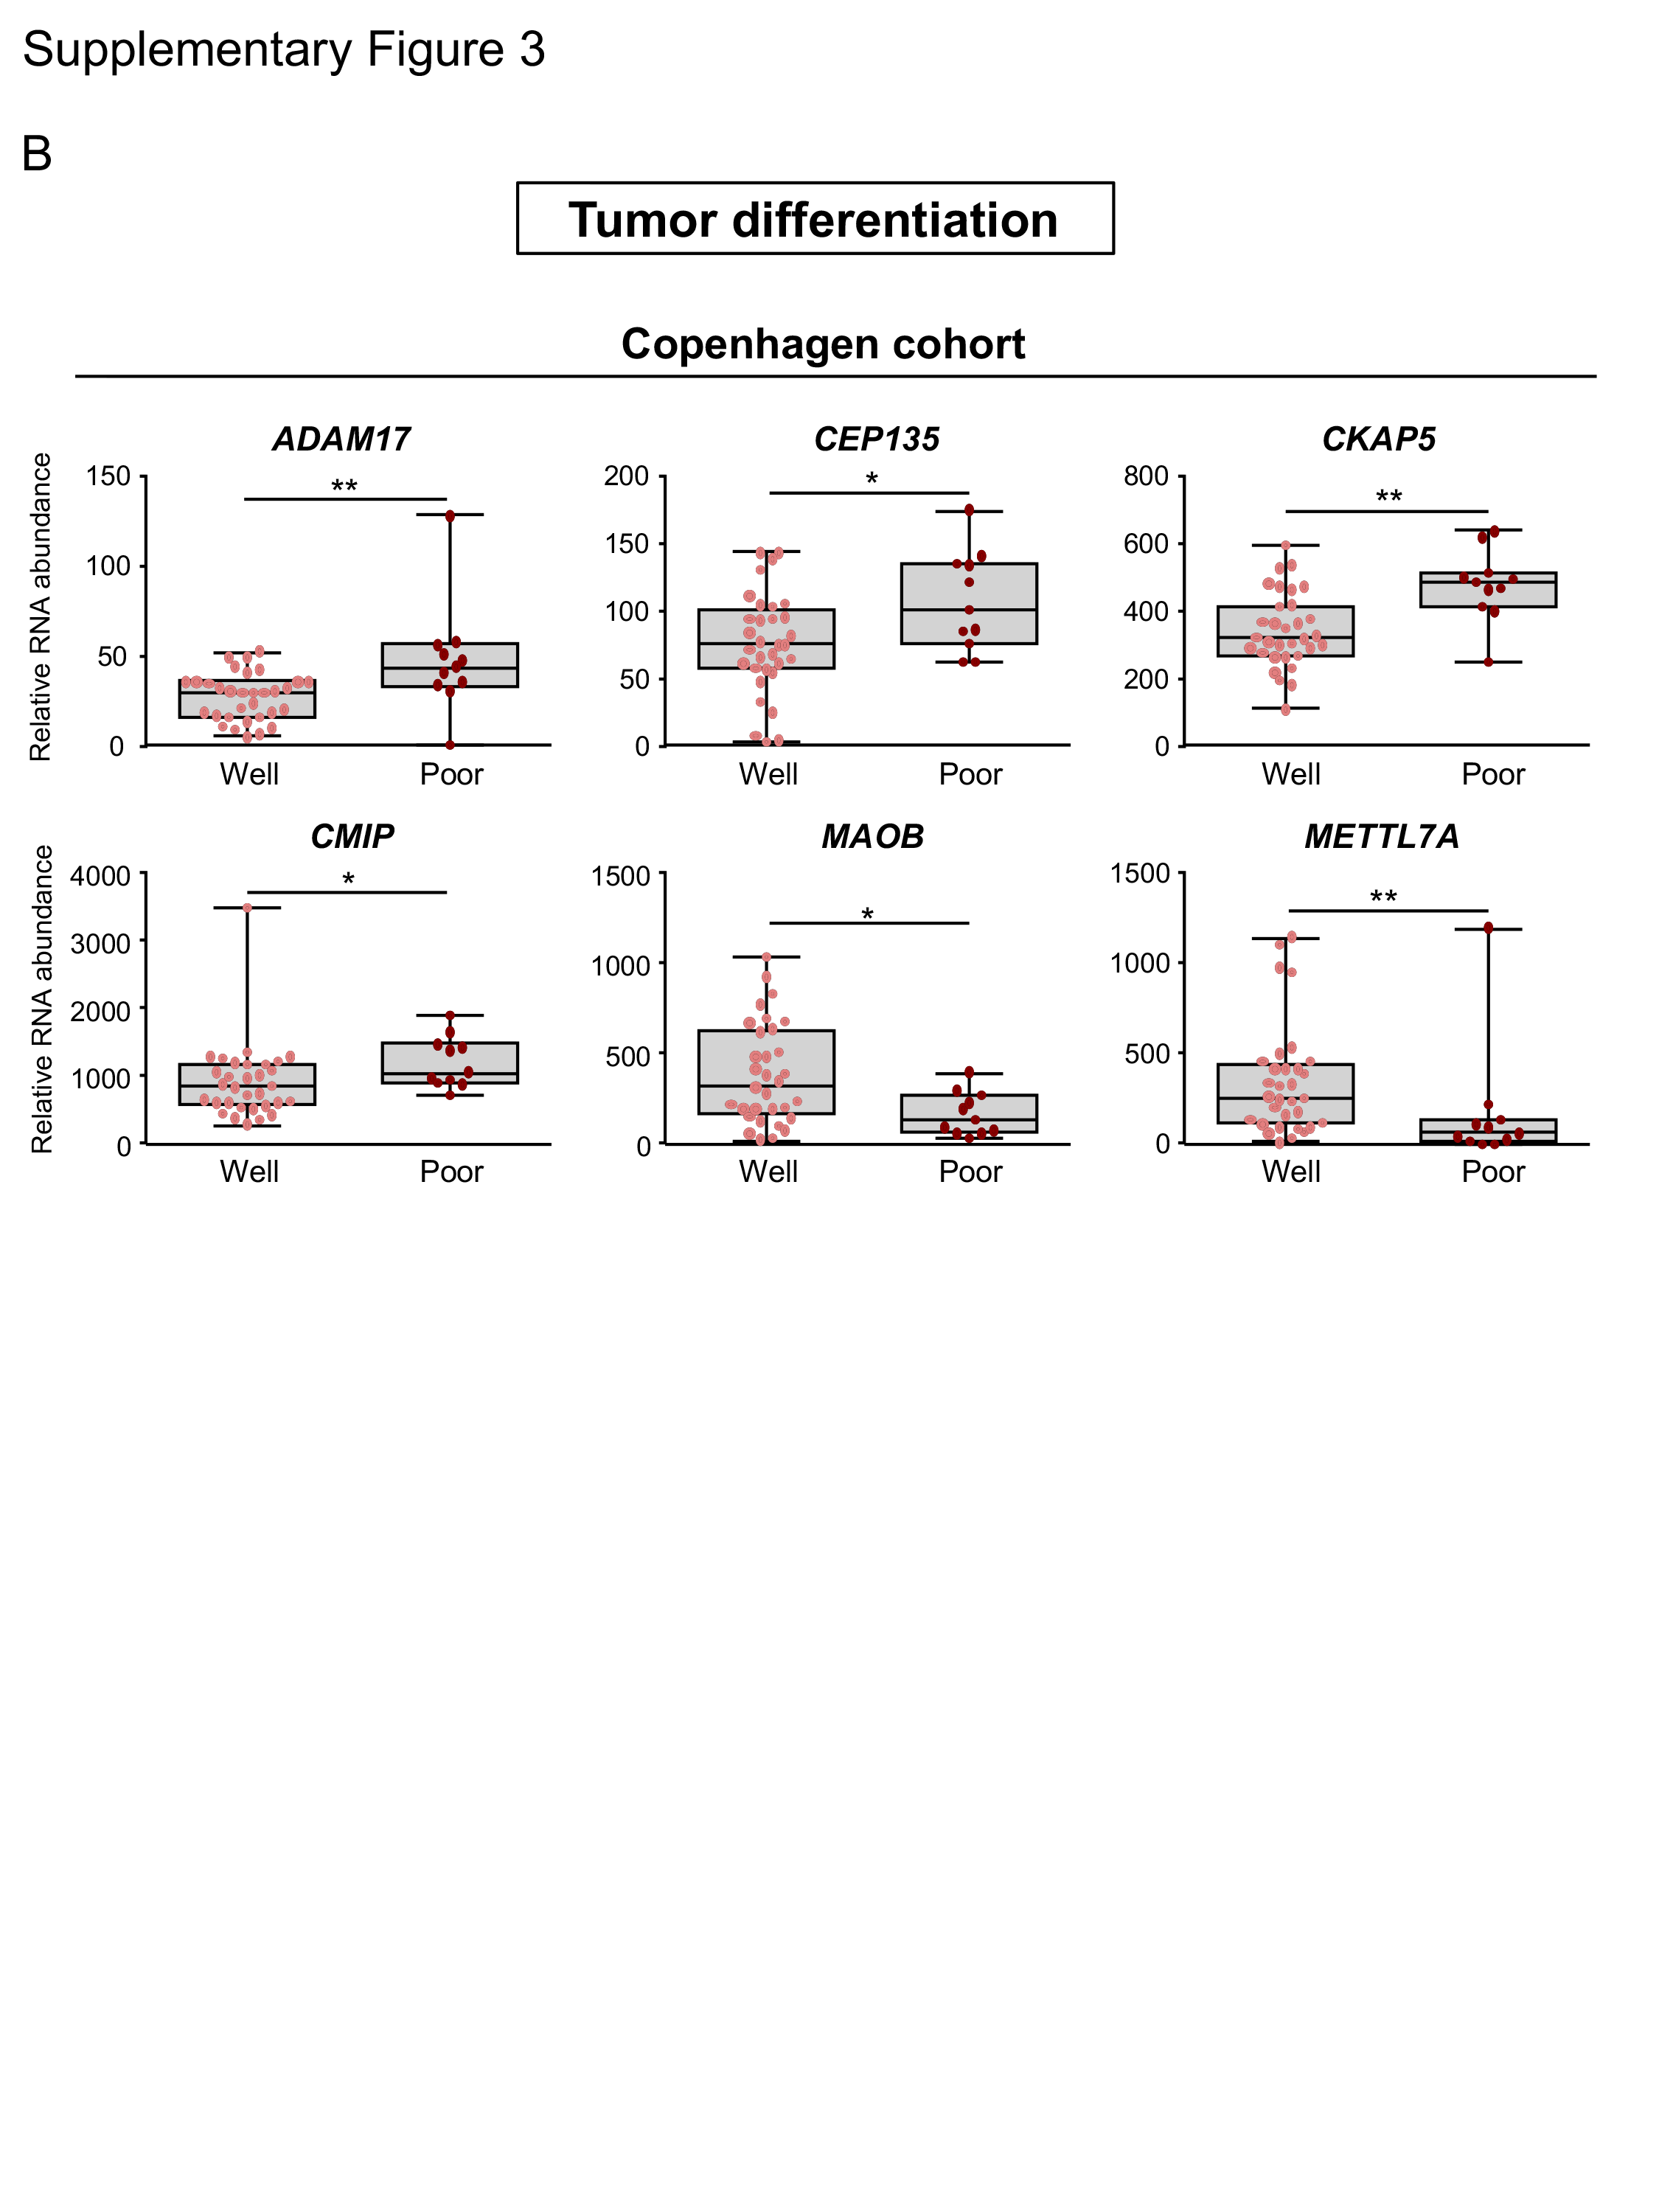

Supplement: s1 [file s1 › Suppl Fig 3B.tif]

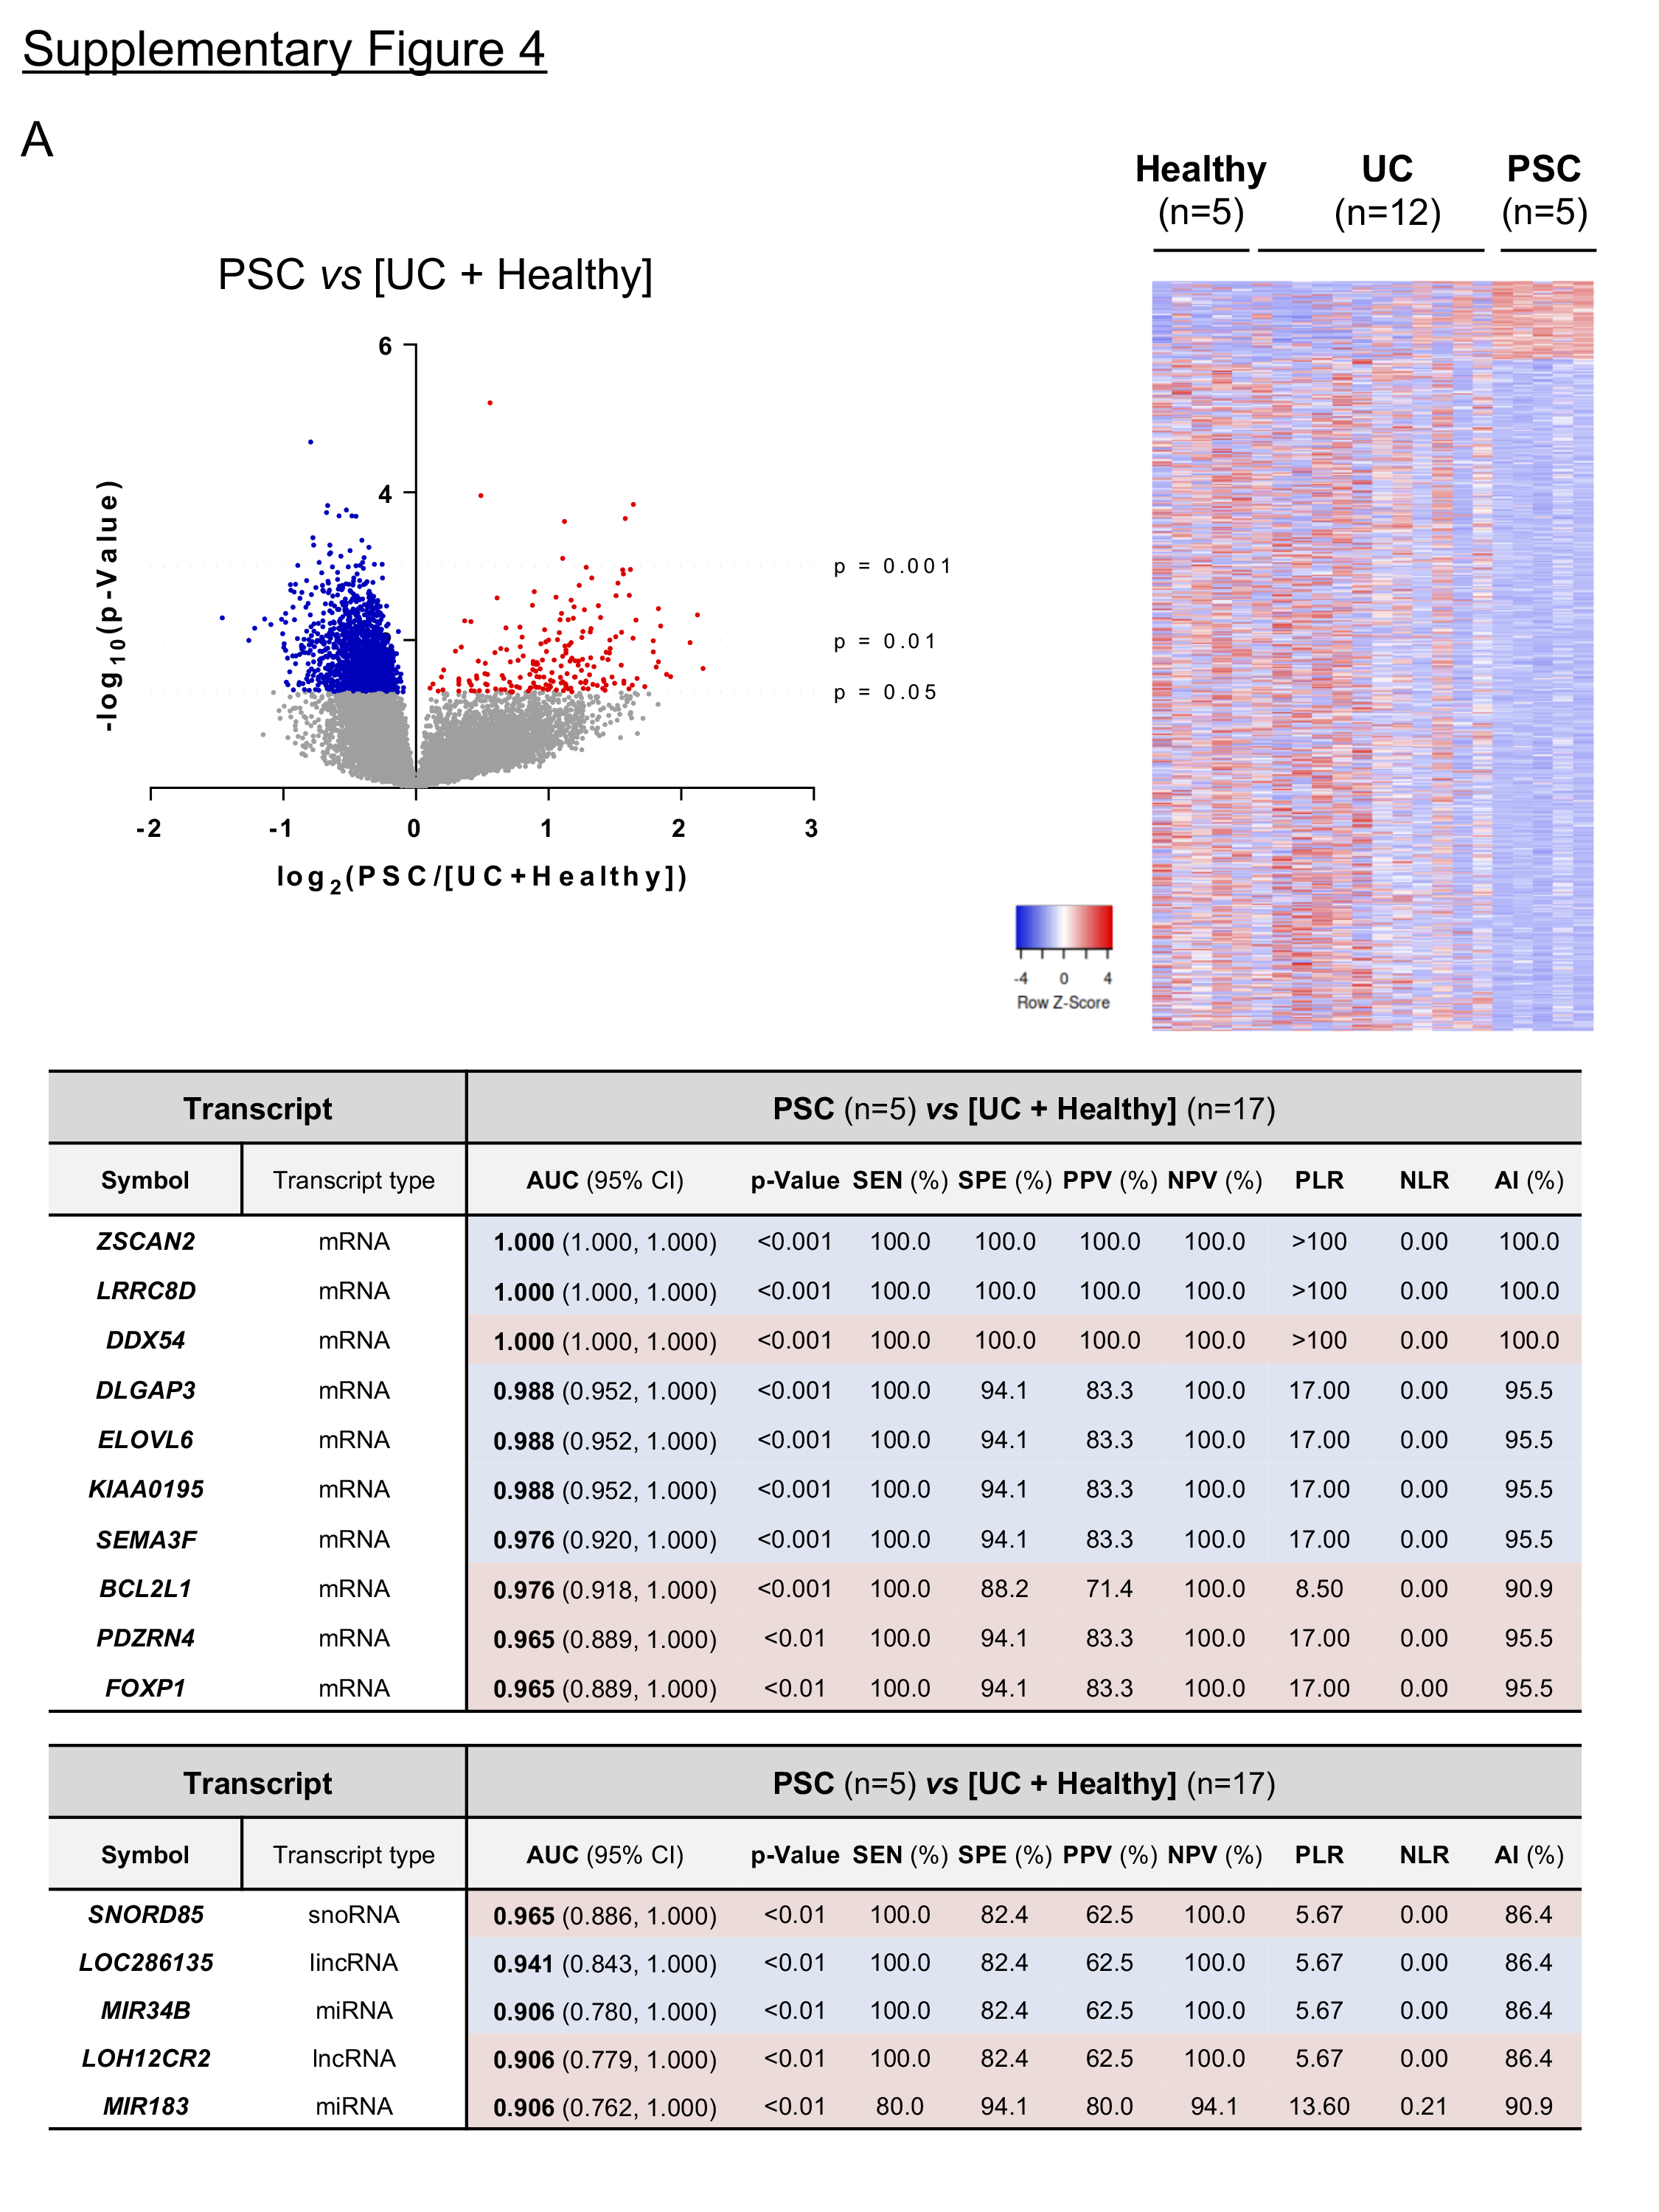

Supplement: s1 [file s1 › Suppl Fig 4A.tif]

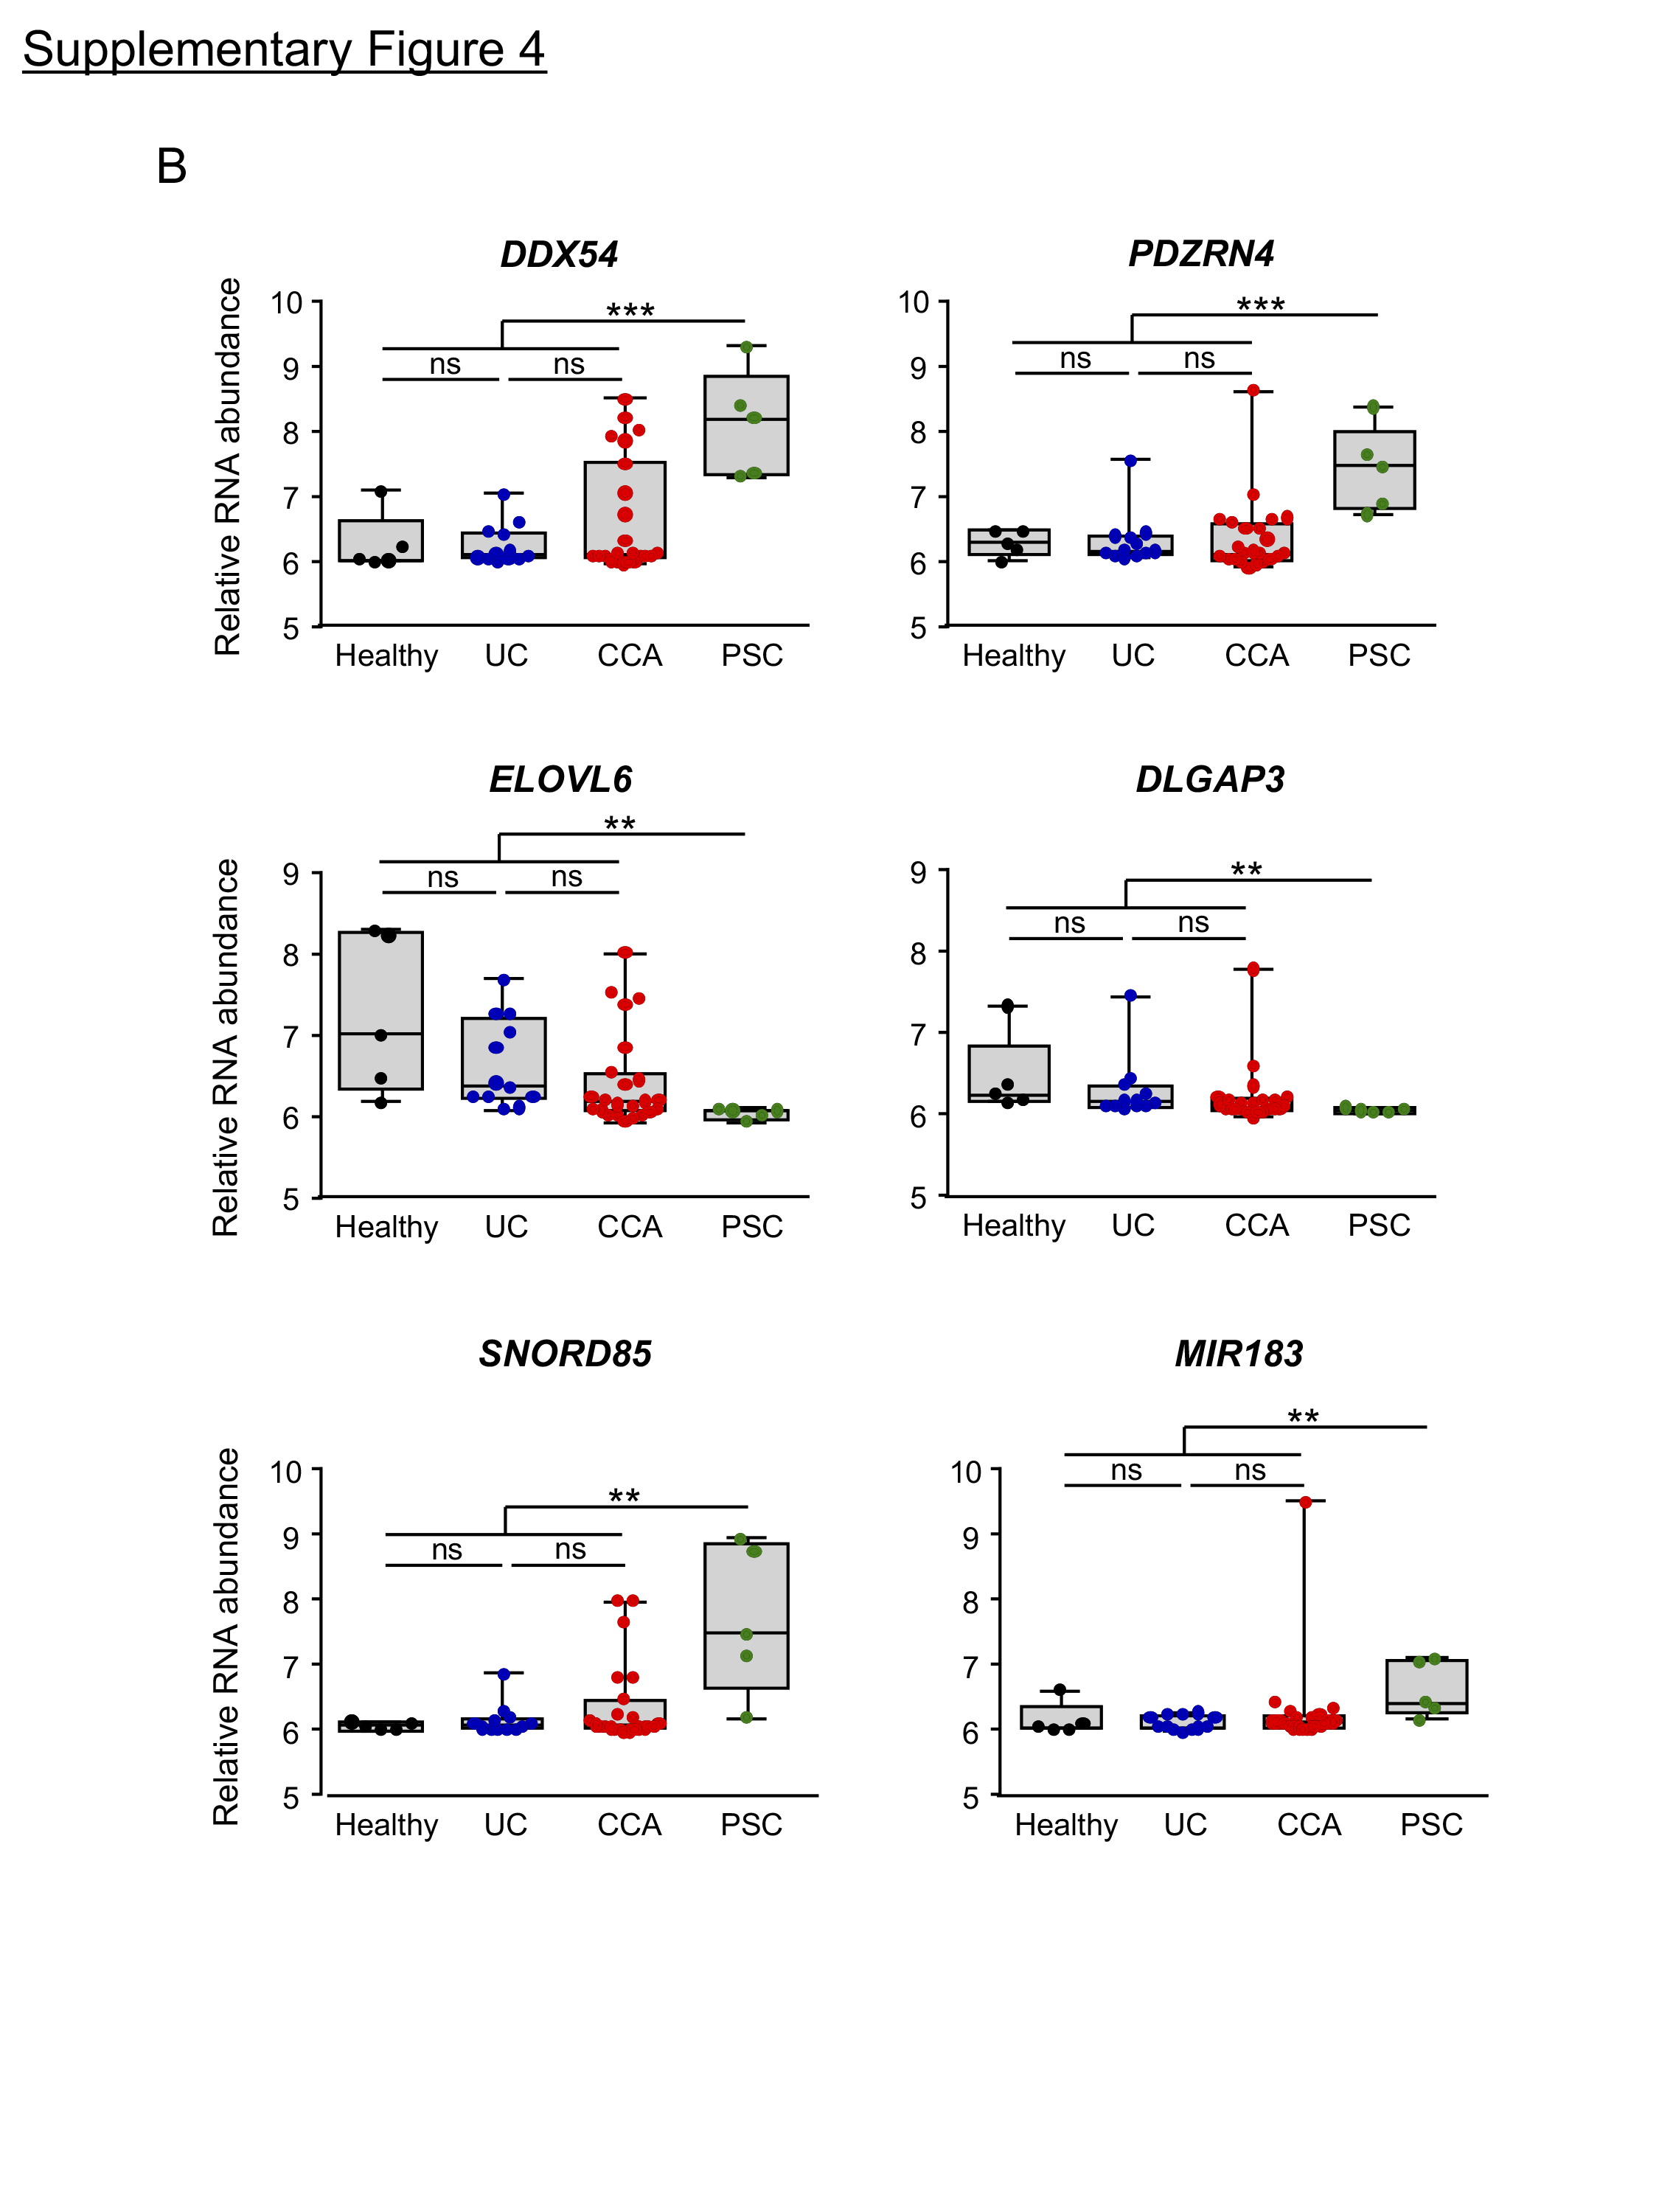

Supplement: s1 [file s1 › Suppl Fig 4B.tif]

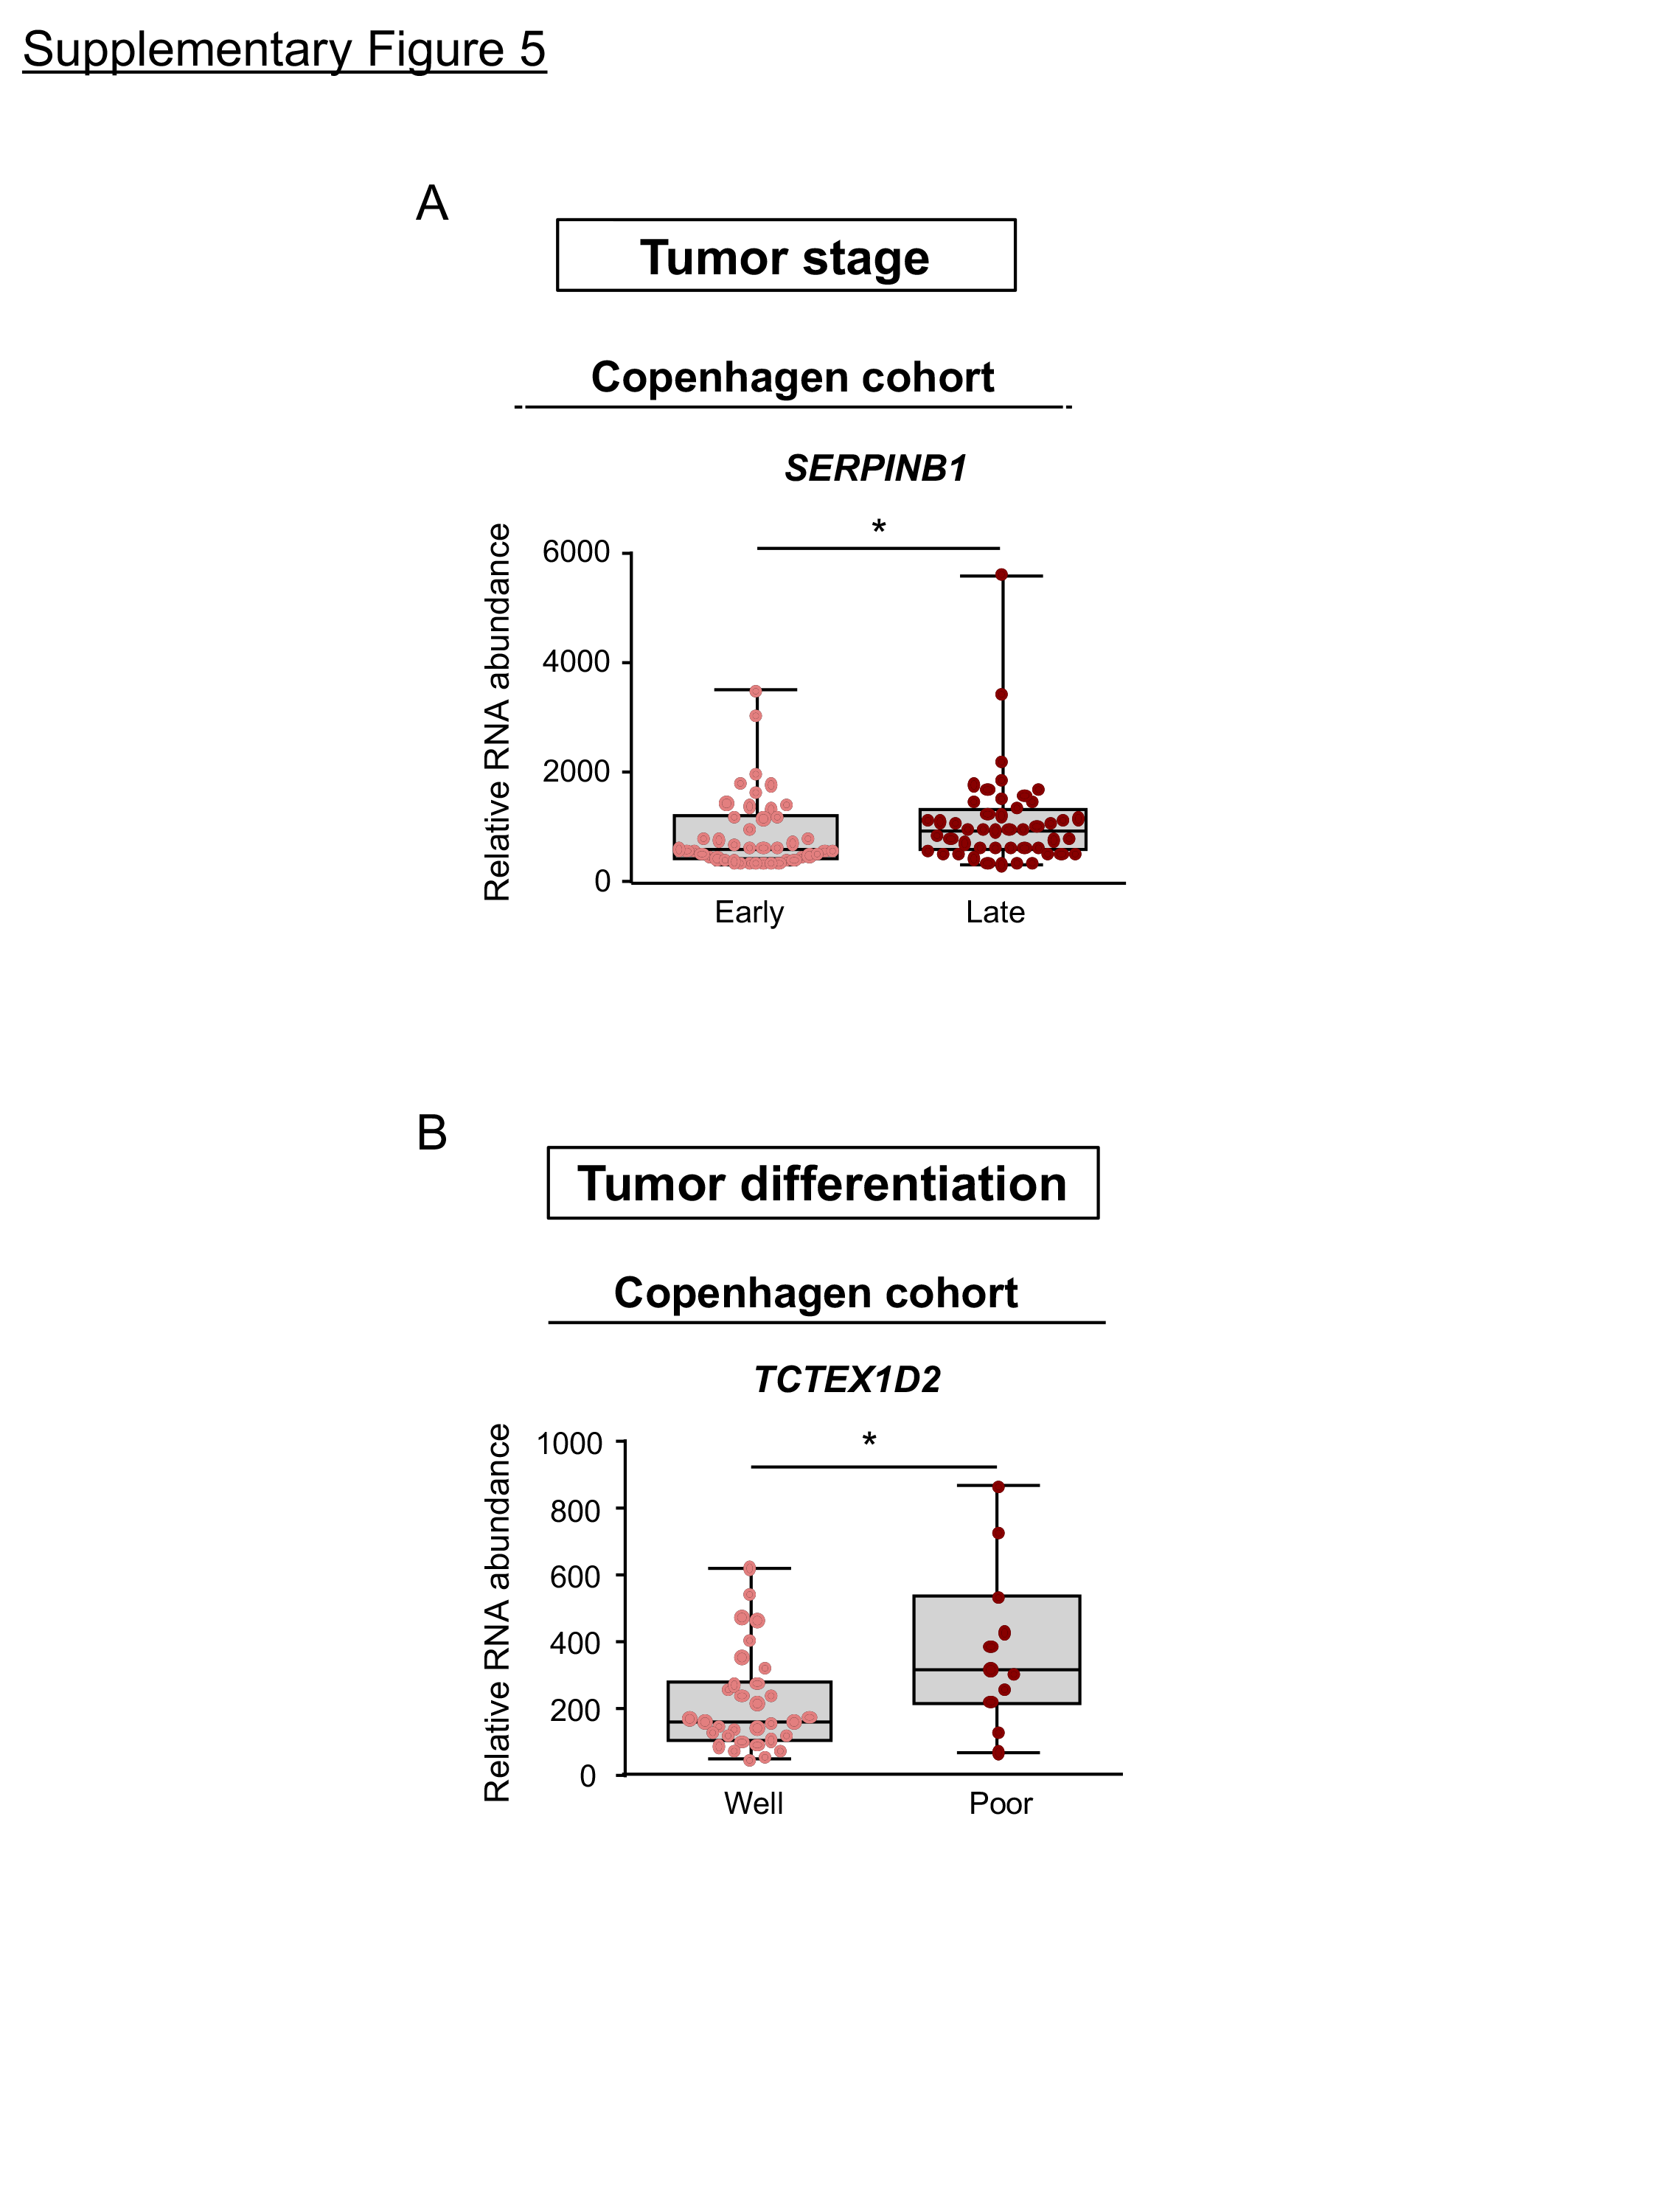

Supplement: s1 [file s1 › Suppl Fig 5A,B.tif]

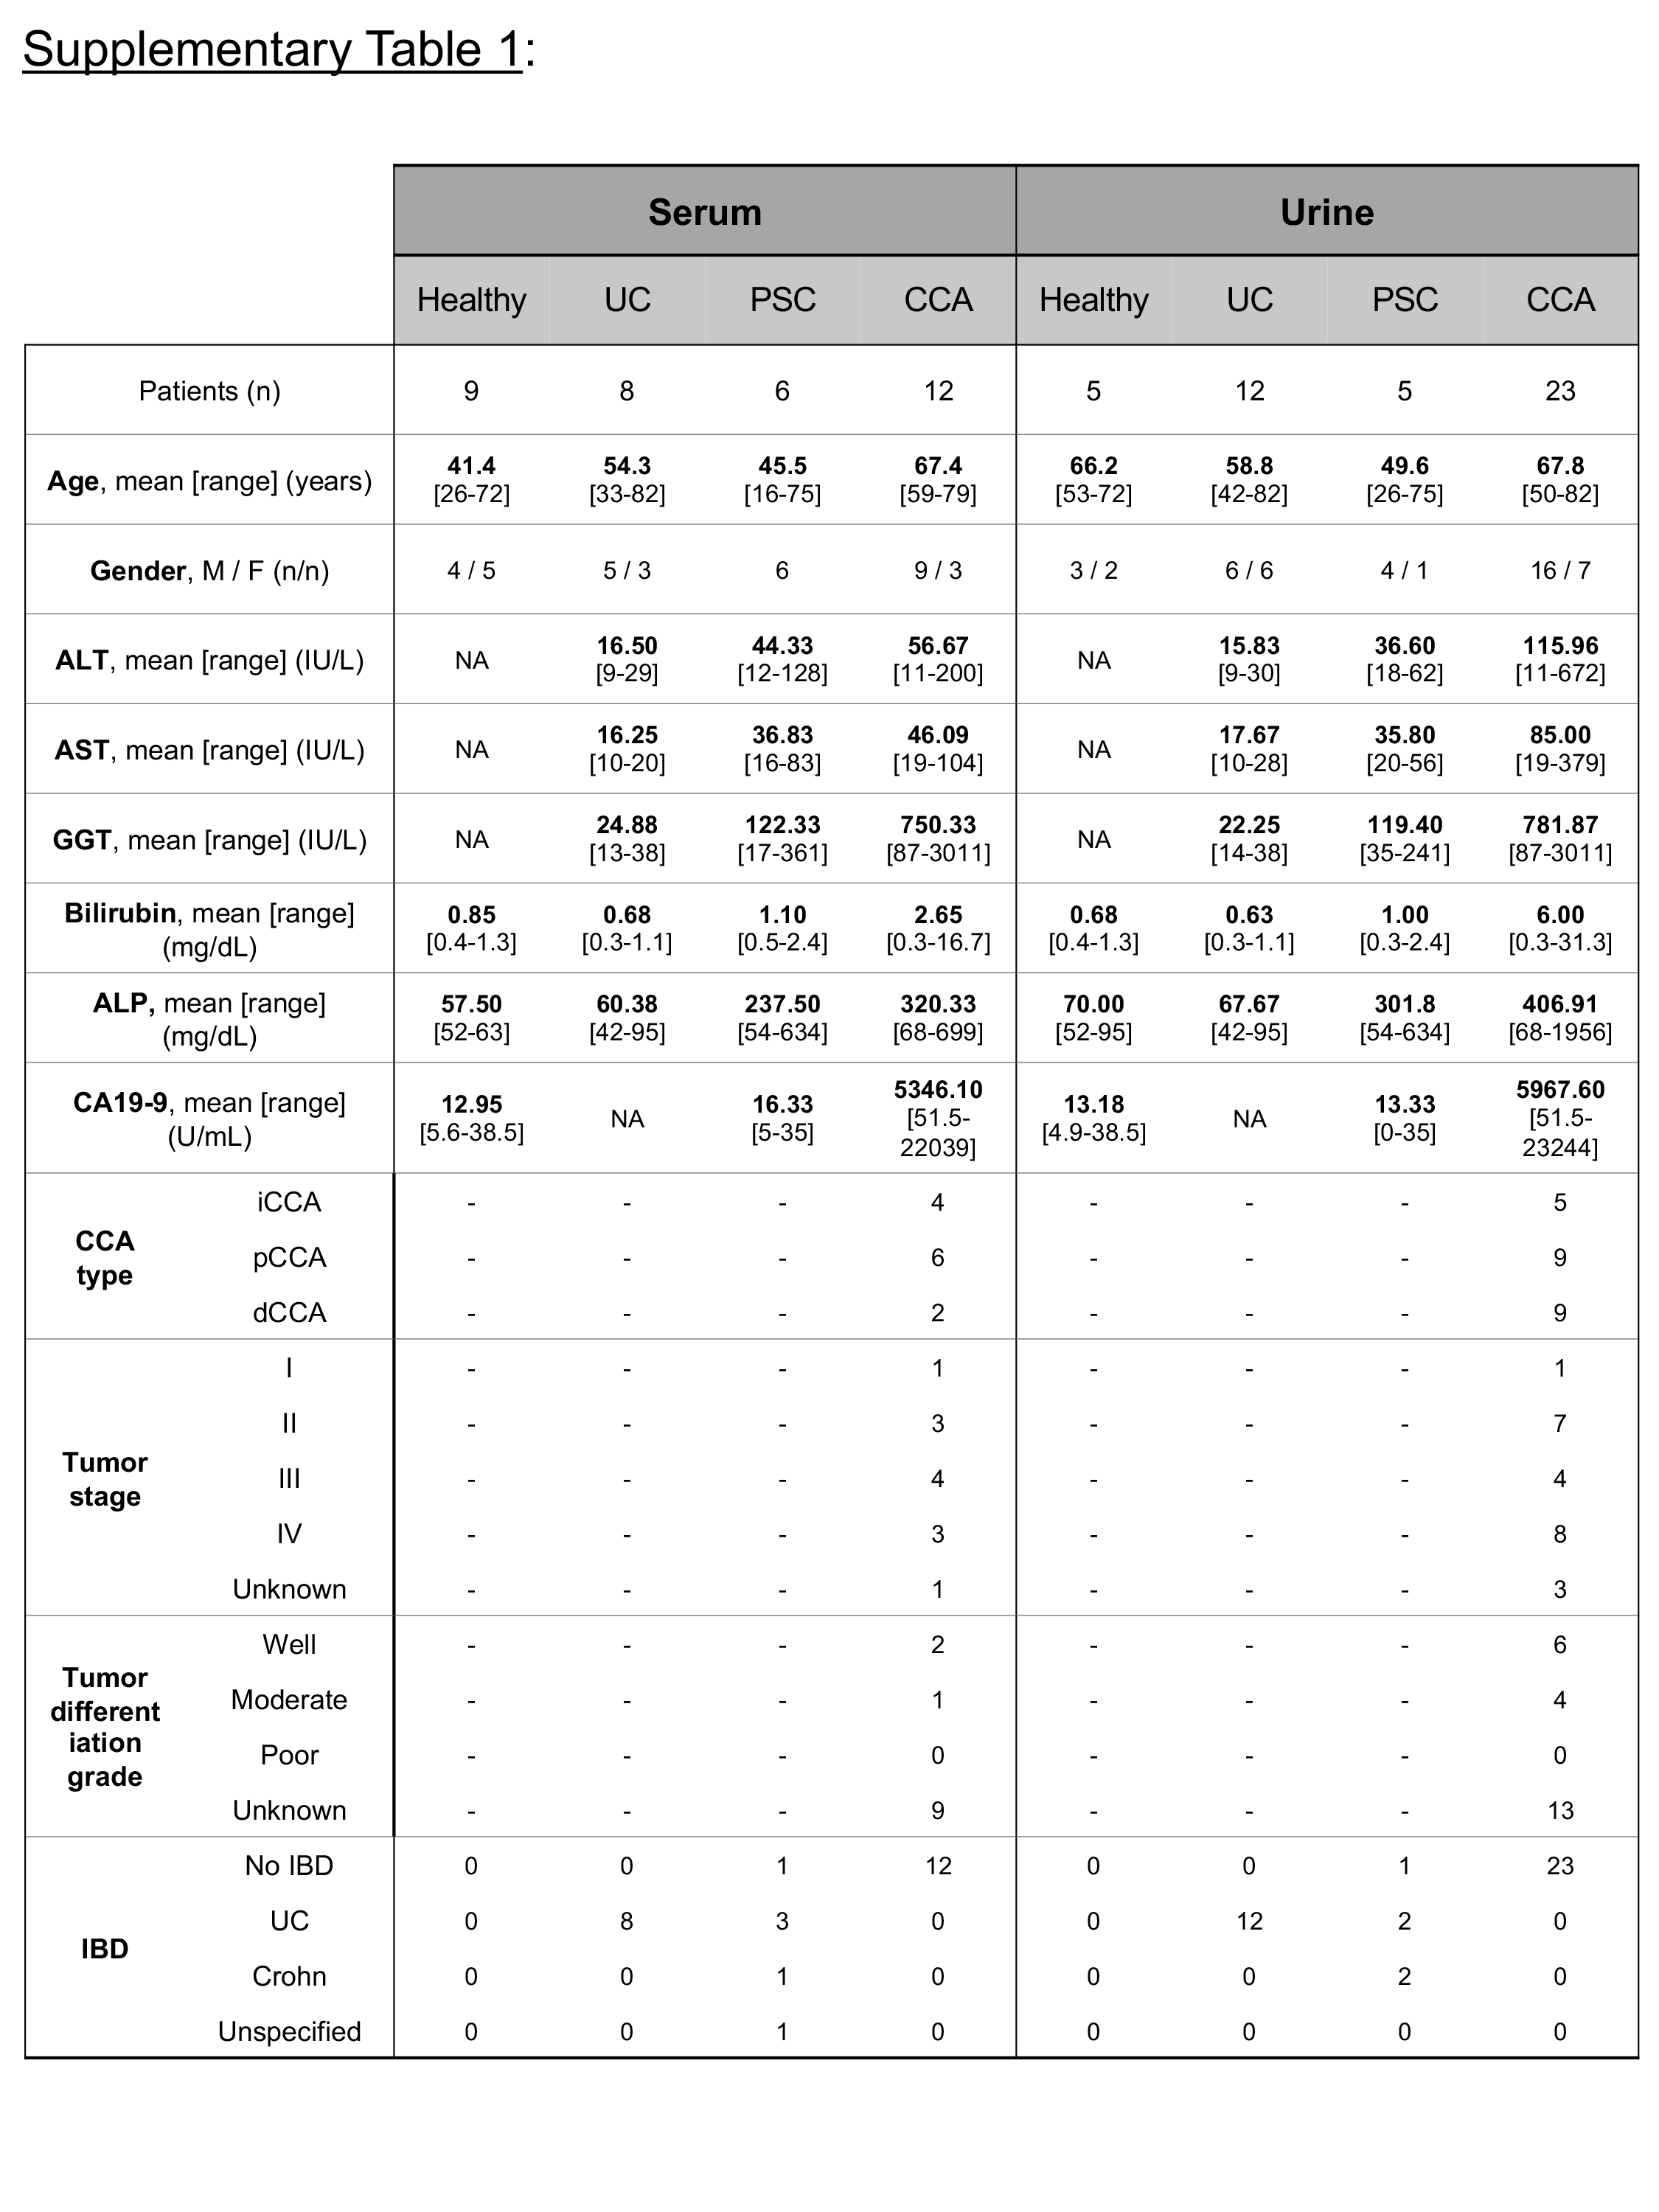

Supplement: s1 [file s1 › Suppl Table 1.tif]

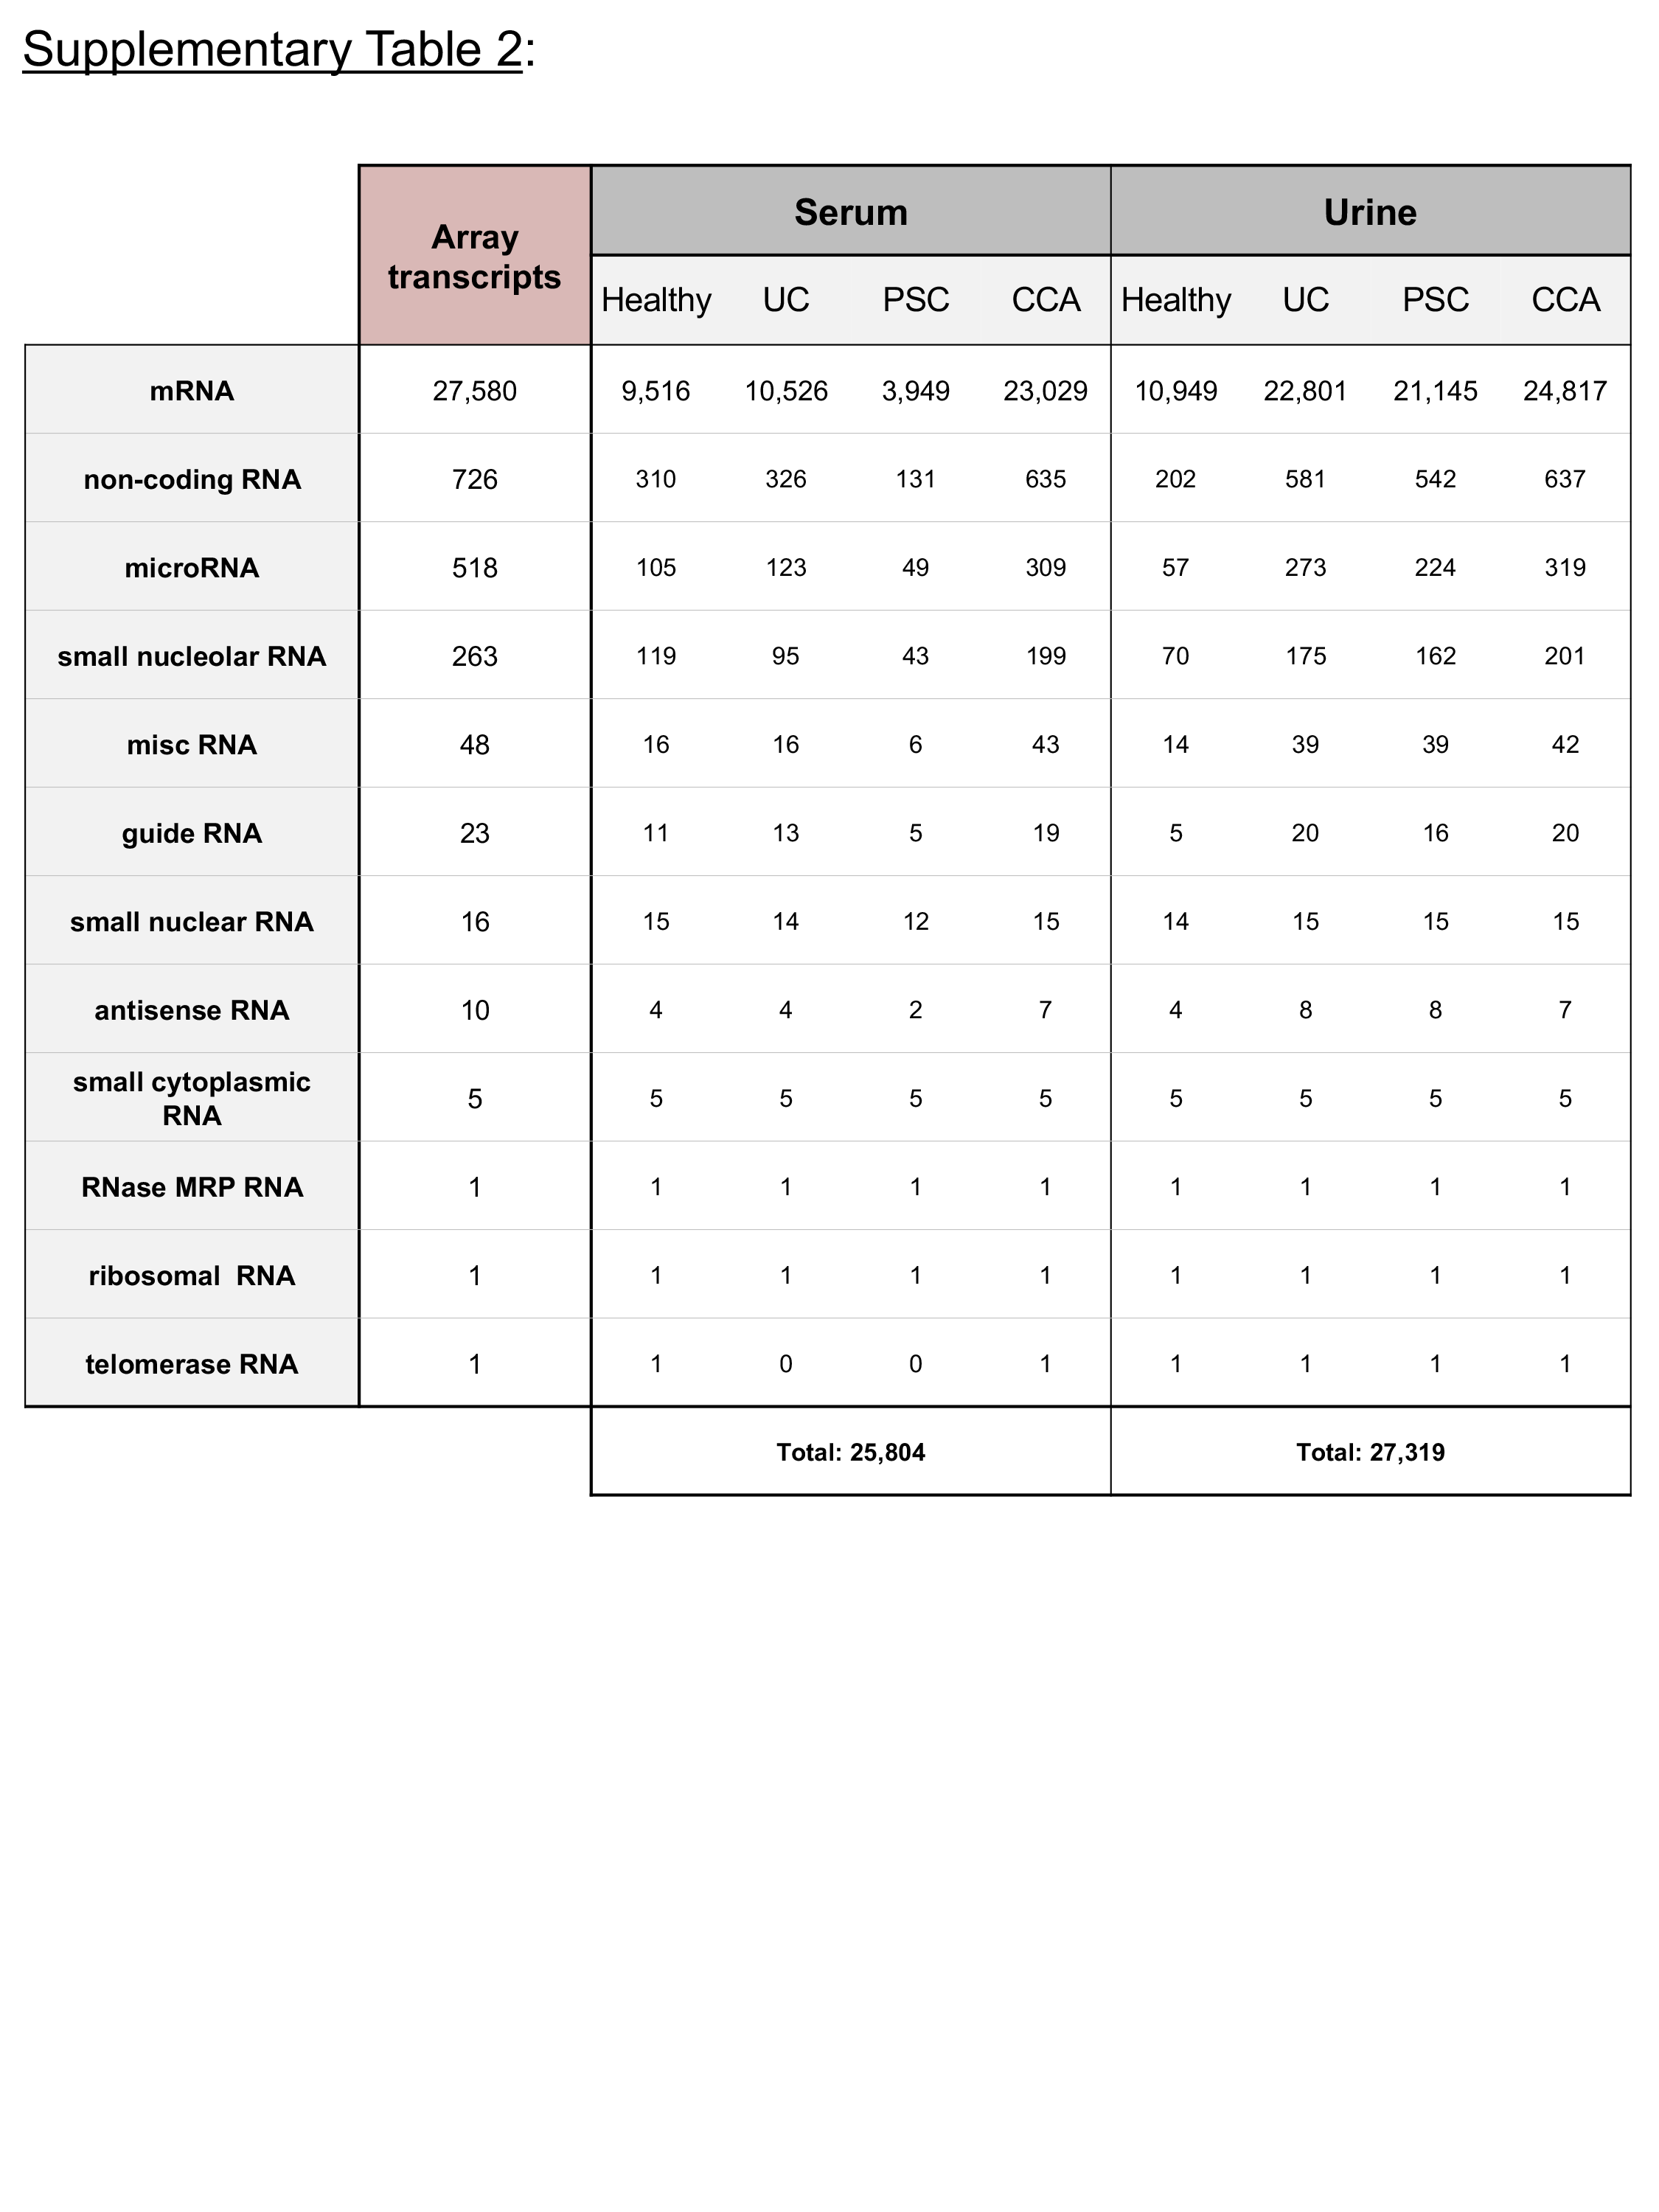

Supplement: s1 [file s1 › Suppl Table 2.tif]
